# Supplementary material for: New 11-Methoxymethylgermacranolides from the Whole Plant of Carpesium divaricatum
Source: MDPI journal article supplement (doi:10.3390/molecules27185991), 2022-09-14
Supplement: s1 [file s1]

## Contents of Supplementary Information

|                     | contents                                                                                                                                                                                                                      |
|---------------------|-------------------------------------------------------------------------------------------------------------------------------------------------------------------------------------------------------------------------------|
| C1                  | The relevant data of ECD calculations of compounds <b>5Ja</b> and <b>7Ja</b>                                                                                                                                                  |
| Table S1            | Crystal data and structure refinement for <b>1</b> .                                                                                                                                                                          |
| Table S2            | Fractional atomic coordinates ( $\times 10^4$ ) and equivalent isotropic displacement parameters ( $\text{\AA}^2 \times 10^3$ ) for <b>1</b> . $U_{eq}$ is defined as 1/3 of the trace of the orthogonalised $U_{ij}$ tensor. |
| Table S3            | Anisotropic displacement parameters ( $\text{\AA}^2 \times 10^3$ ) for <b>1</b> . The anisotropic displacement factor exponent takes the form: $-2\pi^2[h^2a^*2U_{11} + \dots + 2hka \times b \times U_{12}]$                 |
| Table S4            | Bond lengths for <b>1</b> .                                                                                                                                                                                                   |
| Table S5            | Bond angles for <b>1</b> .                                                                                                                                                                                                    |
| Table S6            | Torsion angles for <b>1</b> .                                                                                                                                                                                                 |
| Table S7            | Hydrogen atom coordinates ( $\text{\AA} \times 10^4$ ) and isotropic displacement parameters ( $\text{\AA}^2 \times 10^3$ ) for <b>1</b> .                                                                                    |
|                     | Computational details                                                                                                                                                                                                         |
| Table S8            | Conformational analysis of <b>5Ja</b>                                                                                                                                                                                         |
| Table S9            | Conformational analysis of <b>7Ja</b>                                                                                                                                                                                         |
| <b>Figure S1.1</b>  | $^1\text{H}$ NMR spectrum of compound <b>1</b> in $\text{CD}_3\text{OD}$                                                                                                                                                      |
| <b>Figure S1.2</b>  | $^{13}\text{C}$ NMR spectrum of compound <b>1</b> in $\text{CD}_3\text{OD}$                                                                                                                                                   |
| <b>Figure S1.3</b>  | $^1\text{H}$ - $^1\text{H}$ COSY spectrum of compound <b>1</b> in $\text{CD}_3\text{OD}$                                                                                                                                      |
| <b>Figure S1.4</b>  | HSQC spectrum of compound <b>1</b> in $\text{CD}_3\text{OD}$                                                                                                                                                                  |
| <b>Figure S1.5</b>  | HMBC spectrum of compound <b>1</b> in $\text{CD}_3\text{OD}$                                                                                                                                                                  |
| <b>Figure S1.6</b>  | NOESY spectrum of compound <b>1</b> in $\text{CD}_3\text{OD}$                                                                                                                                                                 |
| <b>Figure S1.7</b>  | UV spectrum of compound <b>1</b>                                                                                                                                                                                              |
| <b>Figure S1.8</b>  | IR spectrum of compound <b>1</b>                                                                                                                                                                                              |
| <b>Figure S1.9</b>  | HRESIMS spectrum of compound <b>1</b>                                                                                                                                                                                         |
| <b>Figure S1.10</b> | ECD spectrum of compound <b>1</b>                                                                                                                                                                                             |
| <b>Figure S2.1</b>  | $^1\text{H}$ NMR spectrum of compound <b>2</b> in $\text{CD}_3\text{OD}$                                                                                                                                                      |
| <b>Figure S2.2</b>  | $^{13}\text{C}$ NMR spectrum of compound <b>2</b> in $\text{CD}_3\text{OD}$                                                                                                                                                   |
| <b>Figure S2.3</b>  | $^1\text{H}$ - $^1\text{H}$ COSY spectrum of compound <b>2</b> in $\text{CD}_3\text{OD}$                                                                                                                                      |
| <b>Figure S2.4</b>  | HSQC spectrum of compound <b>2</b> in $\text{CD}_3\text{OD}$                                                                                                                                                                  |
| <b>Figure S2.5</b>  | HMBC spectrum of compound <b>2</b> in $\text{CD}_3\text{OD}$                                                                                                                                                                  |
| <b>Figure S2.6</b>  | NOESY spectrum of compound <b>2</b> in $\text{CD}_3\text{OD}$                                                                                                                                                                 |
| <b>Figure S2.7</b>  | UV spectrum of compound <b>2</b>                                                                                                                                                                                              |
| <b>Figure S2.8</b>  | IR spectrum of compound <b>2</b>                                                                                                                                                                                              |
| <b>Figure S2.9</b>  | HRESIMS spectrum of compound <b>2</b>                                                                                                                                                                                         |
| <b>Figure S2.10</b> | ECD spectrum of compound <b>2</b>                                                                                                                                                                                             |
| <b>Figure S3.1</b>  | $^1\text{H}$ NMR spectrum of compound <b>3</b> in $\text{CD}_3\text{OD}$                                                                                                                                                      |
| <b>Figure S3.2</b>  | $^{13}\text{C}$ NMR spectrum of compound <b>3</b> in $\text{CD}_3\text{OD}$                                                                                                                                                   |
| <b>Figure S3.3</b>  | $^1\text{H}$ - $^1\text{H}$ COSY spectrum of compound <b>3</b> in $\text{CD}_3\text{OD}$                                                                                                                                      |
| <b>Figure S3.4</b>  | HSQC spectrum of compound <b>3</b> in $\text{CD}_3\text{OD}$                                                                                                                                                                  |
| <b>Figure S3.5</b>  | HMBC spectrum of compound <b>3</b> in $\text{CD}_3\text{OD}$                                                                                                                                                                  |

|                     |                                                                                         |
|---------------------|-----------------------------------------------------------------------------------------|
| <b>Figure S3.6</b>  | ROESY spectrum of compound <b>3</b> in CD <sub>3</sub> OD                               |
| <b>Figure S3.7</b>  | UV spectrum of compound <b>3</b>                                                        |
| <b>Figure S3.8</b>  | IR spectrum of compound <b>3</b>                                                        |
| <b>Figure S3.9</b>  | HRESIMS spectrum of compound <b>3</b>                                                   |
| <b>Figure S3.10</b> | ECD spectrum of compound <b>3</b>                                                       |
| <b>Figure S4.1</b>  | <sup>1</sup> H NMR spectrum of compound <b>4</b> in CD <sub>3</sub> OD                  |
| <b>Figure S4.2</b>  | <sup>13</sup> C NMR spectrum of compound <b>4</b> in CD <sub>3</sub> OD                 |
| <b>Figure S4.3</b>  | <sup>1</sup> H- <sup>1</sup> H COSY spectrum of compound <b>4</b> in CD <sub>3</sub> OD |
| <b>Figure S4.4</b>  | HSQC spectrum of compound <b>4</b> in CD <sub>3</sub> OD                                |
| <b>Figure S4.5</b>  | HMBC spectrum of compound <b>4</b> in CD <sub>3</sub> OD                                |
| <b>Figure S4.6</b>  | NOESY spectrum of compound <b>4</b> in CD <sub>3</sub> OD                               |
| <b>Figure S4.7</b>  | UV spectrum of compound <b>4</b>                                                        |
| <b>Figure S4.8</b>  | IR spectrum of compound <b>4</b>                                                        |
| <b>Figure S4.9</b>  | HRESIMS spectrum of compound <b>4</b>                                                   |
| <b>Figure S4.10</b> | ECD spectrum of compound <b>4</b>                                                       |
| <b>Figure S5.1</b>  | <sup>1</sup> H NMR spectrum of compound <b>5</b> in CD <sub>3</sub> OD                  |
| <b>Figure S5.2</b>  | <sup>13</sup> C NMR spectrum of compound <b>5</b> in CD <sub>3</sub> OD                 |
| <b>Figure S5.3</b>  | <sup>1</sup> H- <sup>1</sup> H COSY spectrum of compound <b>5</b> in CD <sub>3</sub> OD |
| <b>Figure S5.4</b>  | HSQC spectrum of compound <b>5</b> in CD <sub>3</sub> OD                                |
| <b>Figure S5.5</b>  | HMBC spectrum of compound <b>5</b> in CD <sub>3</sub> OD                                |
| <b>Figure S5.6</b>  | NOESY spectrum of compound <b>5</b> in CD <sub>3</sub> OD                               |
| <b>Figure S5.7</b>  | UV spectrum of compound <b>5</b>                                                        |
| <b>Figure S5.8</b>  | IR spectrum of compound <b>5</b>                                                        |
| <b>Figure S5.9</b>  | HRESIMS spectrum of compound <b>5</b>                                                   |
| <b>Figure S5.10</b> | ECD spectrum of compound <b>5</b>                                                       |
| <b>Figure S6.1</b>  | <sup>1</sup> H NMR spectrum of compound <b>6</b> in CD <sub>3</sub> OD                  |
| <b>Figure S6.2</b>  | <sup>13</sup> C NMR spectrum of compound <b>6</b> in CD <sub>3</sub> OD                 |
| <b>Figure S6.3</b>  | <sup>1</sup> H- <sup>1</sup> H COSY spectrum of compound <b>6</b> in CD <sub>3</sub> OD |
| <b>Figure S6.4</b>  | HSQC spectrum of compound <b>6</b> in CD <sub>3</sub> OD                                |
| <b>Figure S6.5</b>  | HMBC spectrum of compound <b>6</b> in CD <sub>3</sub> OD                                |
| <b>Figure S6.6</b>  | ROESY spectrum of compound <b>6</b> in CD <sub>3</sub> OD                               |
| <b>Figure S6.7</b>  | UV spectrum of compound <b>6</b>                                                        |
| <b>Figure S6.8</b>  | IR spectrum of compound <b>6</b>                                                        |
| <b>Figure S6.9</b>  | HRESIMS spectrum of compound <b>6</b>                                                   |
| <b>Figure S6.10</b> | ECD spectrum of compound <b>6</b>                                                       |
| <b>Figure S7.1</b>  | <sup>1</sup> H NMR spectrum of compound <b>7</b> in CD <sub>3</sub> OD                  |
| <b>Figure S7.2</b>  | <sup>13</sup> C NMR spectrum of compound <b>7</b> in CD <sub>3</sub> OD                 |
| <b>Figure S7.3</b>  | <sup>1</sup> H- <sup>1</sup> H COSY spectrum of compound <b>7</b> in CD <sub>3</sub> OD |
| <b>Figure S7.4</b>  | HSQC spectrum of compound <b>7</b> in CD <sub>3</sub> OD                                |
| <b>Figure S7.5</b>  | HMBC spectrum of compound <b>7</b> in CD <sub>3</sub> OD                                |
| <b>Figure S7.6</b>  | ROESY spectrum of compound <b>7</b> in CD <sub>3</sub> OD                               |
| <b>Figure S7.7</b>  | UV spectrum of compound <b>7</b>                                                        |
| <b>Figure S7.8</b>  | IR spectrum of compound <b>7</b>                                                        |

|                     |                                                                                         |
|---------------------|-----------------------------------------------------------------------------------------|
| <b>Figure S7.9</b>  | HRESIMS spectrum of compound <b>7</b>                                                   |
| <b>Figure S7.10</b> | ECD spectrum of compound <b>7</b>                                                       |
| <b>Figure S8.1</b>  | <sup>1</sup> H NMR spectrum of compound <b>8</b> in CD <sub>3</sub> OD                  |
| <b>Figure S8.2</b>  | <sup>13</sup> C NMR spectrum of compound <b>8</b> in CD <sub>3</sub> OD                 |
| <b>Figure S8.3</b>  | <sup>1</sup> H- <sup>1</sup> H COSY spectrum of compound <b>8</b> in CD <sub>3</sub> OD |
| <b>Figure S8.4</b>  | HSQC spectrum of compound <b>8</b> in CD <sub>3</sub> OD                                |
| <b>Figure S8.5</b>  | HMBC spectrum of compound <b>8</b> in CD <sub>3</sub> OD                                |
| <b>Figure S8.6</b>  | NOESY spectrum of compound <b>8</b> in CD <sub>3</sub> OD                               |
| <b>Figure S8.7</b>  | UV spectrum of compound <b>8</b>                                                        |
| <b>Figure S8.8</b>  | IR spectrum of compound <b>8</b>                                                        |
| <b>Figure S8.9</b>  | HRESIMS spectrum of compound <b>8</b>                                                   |
| <b>Figure S8.10</b> | ECD spectrum of compound <b>8</b>                                                       |

C1: The relevant data of ECD calculations of compounds **5Ja** and **7Ja**

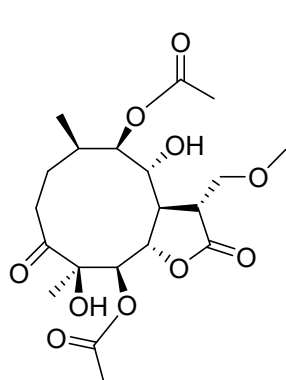

A simplified structure **5Ja**

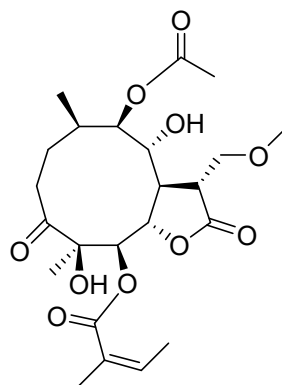

A simplified structure **7Ja**

**Table S1.** Crystal data and structure refinement for **1**.

|                                         |                                                 |
|-----------------------------------------|-------------------------------------------------|
| Identification code                     | exp_5475                                        |
| Empirical formula                       | C <sub>25</sub> H <sub>38</sub> O <sub>10</sub> |
| Formula weight                          | 498.55                                          |
| Temperature/K                           | 110.7(2)                                        |
| Crystal system                          | monoclinic                                      |
| Space group                             | P21                                             |
| a/Å, b/Å, c/Å                           | 9.0365(3), 11.1281(3), 13.1083(4)               |
| α/°, β/°, γ/°                           | 90.00, 97.237(3), 90.00                         |
| Volume/Å <sup>3</sup>                   | 1307.66(7)                                      |
| Z                                       | 2                                               |
| ρ <sub>calc</sub> / mg mm <sup>-3</sup> | 1.266                                           |
| μ/mm <sup>-1</sup>                      | 0.813                                           |
| F(000)                                  | 536                                             |
| Crystal size / mm <sup>3</sup>          | 0.25 × 0.22 × 0.13                              |

|                                                                |                                                                   |
|----------------------------------------------------------------|-------------------------------------------------------------------|
| 2 $\Theta$ range for data collection                           | 10.46 to 142.04°                                                  |
| Index ranges                                                   | $-7 \leq h \leq 11$ , $-13 \leq k \leq 13$ , $-15 \leq l \leq 15$ |
| Reflections collected                                          | 8728                                                              |
| Independent reflections                                        | 4912[R(int) = 0.0283]                                             |
| Data/restraints/parameters                                     | 4912/1/325                                                        |
| Goodness-of-fit on F <sup>2</sup>                              | 1.035                                                             |
| Final R indexes [ $I > 2\sigma(I)$ i.e. $F_0 > 4\sigma(F_0)$ ] | $R_1 = 0.0327$ , $wR_2 = 0.0818$                                  |
| Final R indexes [all data]                                     | $R_1 = 0.0341$ , $wR_2 = 0.0831$                                  |
| Largest diff. peak/hole / e Å <sup>-3</sup>                    | 0.210/-0.177                                                      |
| Flack Parameters                                               | -0.03(12)                                                         |
| Completeness                                                   | 0.9988                                                            |

**Table S2.** Fractional atomic coordinates ( $\times 10^4$ ) and equivalent isotropic displacement parameters ( $\text{\AA}^2 \times 10^3$ ) for **1**.  $U_{eq}$  is defined as 1/3 of the trace of the orthogonalised  $U_{ij}$  tensor.

| Atom | <i>x</i>    | <i>y</i>    | <i>z</i>    | <i>U</i> (eq) |
|------|-------------|-------------|-------------|---------------|
| O7   | 1357.0(11)  | 8588.5(11)  | 1777.4(8)   | 16.3(2)       |
| O9   | 328.3(15)   | 11800.4(13) | -753.5(10)  | 28.3(3)       |
| O1   | -3978.8(12) | 9395.3(10)  | -183.6(8)   | 14.8(2)       |
| O8   | -1362.7(13) | 10552.8(10) | -259.0(8)   | 18.2(2)       |
| O5   | 1478.4(11)  | 8554.3(10)  | 3817.9(8)   | 14.7(2)       |
| O4   | -3287.9(13) | 10795.1(11) | 2776.5(9)   | 21.2(3)       |
| O3   | -3026.5(13) | 7944.2(9)   | 1652.1(9)   | 17.0(2)       |
| O6   | 3809.4(13)  | 9307.5(11)  | 4111.5(10)  | 21.9(3)       |
| O10  | 434.8(15)   | 12776.9(12) | 1634.7(12)  | 32.2(3)       |
| O2   | -5288.8(14) | 11105.8(11) | -500.2(10)  | 27.2(3)       |
| C3   | -3104.9(16) | 9723.7(15)  | 2692.8(12)  | 15.7(3)       |
| C16  | -4995.3(18) | 10097.6(15) | -740.0(13)  | 17.3(3)       |
| C4   | -2456.1(18) | 8947.9(15)  | 3589.6(12)  | 16.9(3)       |
| C22  | 4451.5(19)  | 6884.1(16)  | 5026.2(13)  | 20.5(3)       |
| C17  | -5722(2)    | 9410.7(16)  | -1669.5(13) | 22.4(4)       |
| C1   | -3183.5(17) | 9870.8(14)  | 766.1(11)   | 13.5(3)       |
| C9   | -400.4(17)  | 10242.4(14) | 1504.3(12)  | 13.2(3)       |
| C20  | 2973.2(17)  | 8465.1(15)  | 4061.6(11)  | 14.5(3)       |
| C10  | -1543.0(17) | 9777.9(14)  | 619.1(11)   | 13.3(3)       |
| C6   | -81.9(18)   | 10337.7(15) | 3947.2(12)  | 18.2(3)       |
| C8   | 218.0(16)   | 9208.3(13)  | 2224.2(12)  | 13.0(3)       |
| C24  | 5179(2)     | 7683.0(18)  | 5857.6(14)  | 26.2(4)       |
| C21  | 3446.0(18)  | 7184.8(14)  | 4235.3(12)  | 16.3(3)       |
| C5   | -1332.1(18) | 9618.9(16)  | 4364.4(12)  | 19.8(3)       |
| C2   | -3656.3(17) | 9107.6(14)  | 1656.8(12)  | 15.4(3)       |

|     |             |             |             |         |
|-----|-------------|-------------|-------------|---------|
| C11 | -65.4(19)   | 11146.7(15) | -108.4(13)  | 19.1(3) |
| C7  | 916.0(17)   | 9642.5(14)  | 3285.0(12)  | 14.5(3) |
| C15 | 893(2)      | 10919.6(18) | 4864.3(14)  | 27.2(4) |
| C19 | -6595(2)    | 10238.8(18) | -2456.6(14) | 31.5(4) |
| C18 | -6715(3)    | 8425.9(19)  | -1312.3(18) | 42.6(6) |
| C23 | 2758(2)     | 6288.0(15)  | 3449.8(13)  | 22.0(3) |
| C13 | 1549.3(19)  | 11952.0(16) | 1440.3(14)  | 23.4(4) |
| C12 | 778.3(17)   | 10852.5(15) | 931.9(13)   | 17.3(3) |
| C25 | 1026(3)     | 13747.8(18) | 2262.8(16)  | 34.9(5) |
| C14 | -5359.4(18) | 9059.8(18)  | 1597.8(14)  | 23.3(4) |

**Table S3.** Anisotropic displacement parameters ( $\text{\AA}^2 \times 10^3$ ) for **1**. The anisotropic displacement factor exponent takes the form:  $-2\pi^2[h^2a^{*2}U_{11} + \dots + 2hka \times b \times U_{12}]$

| Atom | U11     | U22      | U33     | U23     | U13      | U12     |
|------|---------|----------|---------|---------|----------|---------|
| O7   | 12.7(5) | 16.1(5)  | 19.7(6) | -0.1(5) | 1.0(4)   | 1.7(4)  |
| O9   | 25.1(7) | 31.8(7)  | 27.1(7) | 15.1(6) | 0.5(5)   | -4.3(5) |
| O1   | 13.1(5) | 14.8(5)  | 14.7(5) | -2.0(4) | -4.9(4)  | 0.9(4)  |
| O8   | 18.1(6) | 20.8(6)  | 14.6(5) | 5.5(4)  | -2.2(4)  | -2.3(4) |
| O5   | 12.8(5) | 14.5(5)  | 15.7(5) | 4.3(4)  | -2.9(4)  | -0.6(4) |
| O4   | 20.6(6) | 21.5(6)  | 21.0(6) | -4.1(5) | 0.7(5)   | 6.1(5)  |
| O3   | 17.7(5) | 11.6(5)  | 20.2(6) | -0.7(4) | -3.1(4)  | -2.4(4) |
| O6   | 15.3(6) | 16.9(6)  | 31.6(7) | -0.4(5) | -4.9(5)  | -2.6(5) |
| O10  | 25.2(7) | 18.7(6)  | 49.4(9) | -6.9(6) | -8.7(6)  | -3.7(5) |
| O2   | 32.2(7) | 19.4(6)  | 25.3(6) | -3.4(5) | -14.7(5) | 9.2(5)  |
| C3   | 7.4(7)  | 23.7(8)  | 16.4(7) | -0.4(6) | 3.4(5)   | 1.6(6)  |
| C16  | 16.0(8) | 16.3(8)  | 18.6(8) | -0.5(6) | -2.2(6)  | 1.7(6)  |
| C4   | 13.8(7) | 22.7(8)  | 14.0(7) | 0.0(6)  | 1.0(6)   | 0.5(6)  |
| C22  | 17.7(8) | 20.1(8)  | 23.5(8) | 6.0(7)  | 1.7(6)   | 4.2(6)  |
| C17  | 22.3(8) | 19.7(8)  | 22.0(8) | -6.7(7) | -9.9(7)  | 5.8(7)  |
| C1   | 12.2(7) | 13.2(7)  | 13.5(7) | -4.1(6) | -4.7(5)  | 1.4(5)  |
| C9   | 10.3(7) | 13.0(7)  | 15.1(7) | 0.4(6)  | -2.9(6)  | -0.9(6) |
| C20  | 14.3(7) | 18.0(8)  | 10.6(6) | -0.6(6) | -0.9(5)  | 0.3(6)  |
| C10  | 13.8(7) | 13.7(7)  | 11.6(7) | 2.6(6)  | -1.1(6)  | -1.0(6) |
| C6   | 19.3(8) | 17.9(8)  | 15.6(7) | -3.4(6) | -4.6(6)  | 2.0(6)  |
| C8   | 10.2(7) | 12.6(7)  | 15.8(7) | 1.2(6)  | 0.0(6)   | 0.0(6)  |
| C24  | 22.0(9) | 31.7(10) | 22.5(9) | 6.5(8)  | -6.5(7)  | -0.7(7) |
| C21  | 15.2(8) | 17.0(8)  | 16.9(7) | 1.5(6)  | 3.1(6)   | 0.0(6)  |
| C5   | 19.7(8) | 26.9(9)  | 11.9(7) | -1.4(6) | -1.4(6)  | 4.2(7)  |
| C2   | 9.6(7)  | 17.2(8)  | 18.8(8) | -0.7(6) | -0.2(6)  | 0.8(6)  |
| C11  | 16.6(7) | 17.7(7)  | 22.4(8) | 3.9(7)  | 0.7(6)   | 0.6(6)  |

|     |          |          |          |         |           |           |
|-----|----------|----------|----------|---------|-----------|-----------|
| C7  | 13.7(7)  | 12.2(7)  | 16.4(7)  | 2.9(6)  | -3.3(6)   | -0.6(6)   |
| C15 | 28.8(9)  | 28.1(9)  | 22.8(9)  | -9.5(7) | -4.3(7)   | -0.3(8)   |
| C19 | 37.7(11) | 28.4(9)  | 23.1(9)  | -3.4(8) | -16.8(8)  | 4.8(8)    |
| C18 | 51.4(13) | 25.7(10) | 42.2(12) | -0.1(9) | -26.9(10) | -13.2(10) |
| C23 | 27.0(9)  | 15.7(8)  | 22.6(8)  | -1.8(7) | 1.0(7)    | 0.1(7)    |
| C13 | 16.1(8)  | 21.2(8)  | 30.5(9)  | 7.4(7)  | -6.5(7)   | -6.0(6)   |
| C12 | 12.3(7)  | 16.7(7)  | 22.0(8)  | 5.5(6)  | -0.8(6)   | -0.1(6)   |
| C25 | 43.3(12) | 24(1)    | 34.1(10) | -2.6(8) | -8.1(9)   | -9.7(8)   |
| C14 | 10.7(8)  | 35.5(10) | 23.4(9)  | -0.6(7) | 0.3(6)    | -2.4(7)   |

**Table S4.** Bond lengths for **1**.

| Atom | Atom | Length/Å   | Atom | Atom | Length/Å |
|------|------|------------|------|------|----------|
| O7   | C8   | 1.4248(18) | C22  | C24  | 1.493(3) |
| O9   | C11  | 1.203(2)   | C22  | C21  | 1.332(2) |
| O1   | C16  | 1.3482(19) | C17  | C19  | 1.527(2) |
| O1   | C1   | 1.4563(17) | C17  | C18  | 1.527(3) |
| O8   | C10  | 1.4637(18) | C1   | C10  | 1.522(2) |
| O8   | C11  | 1.339(2)   | C1   | C2   | 1.547(2) |
| O5   | C20  | 1.3520(18) | C9   | C10  | 1.542(2) |
| O5   | C7   | 1.4571(18) | C9   | C8   | 1.547(2) |
| O4   | C3   | 1.211(2)   | C9   | C12  | 1.536(2) |
| O3   | C2   | 1.4146(19) | C20  | C21  | 1.497(2) |
| O6   | C20  | 1.201(2)   | C6   | C5   | 1.540(2) |
| O10  | C13  | 1.409(2)   | C6   | C7   | 1.537(2) |
| O10  | C25  | 1.421(2)   | C6   | C15  | 1.541(2) |
| O2   | C16  | 1.204(2)   | C8   | C7   | 1.531(2) |
| C3   | C4   | 1.516(2)   | C21  | C23  | 1.511(2) |
| C3   | C2   | 1.547(2)   | C2   | C14  | 1.532(2) |
| C16  | C17  | 1.516(2)   | C11  | C12  | 1.512(2) |
| C4   | C5   | 1.537(2)   | C13  | C12  | 1.520(2) |

**Table S5.** Bond angles for **1**.

| Atom | Atom | Atom | Angle/°    | Atom | Atom | Atom | Angle/°    |
|------|------|------|------------|------|------|------|------------|
| C16  | O1   | C1   | 118.75(12) | C5   | C6   | C15  | 108.32(14) |
| C11  | O8   | C10  | 110.92(12) | C7   | C6   | C5   | 116.62(13) |
| C20  | O5   | C7   | 116.88(12) | C7   | C6   | C15  | 109.48(14) |
| C13  | O10  | C25  | 112.03(15) | O7   | C8   | C9   | 109.48(12) |
| O4   | C3   | C4   | 122.32(15) | O7   | C8   | C7   | 106.85(12) |

|     |     |     |            |     |     |     |            |
|-----|-----|-----|------------|-----|-----|-----|------------|
| O4  | C3  | C2  | 118.92(15) | C7  | C8  | C9  | 113.27(12) |
| C4  | C3  | C2  | 118.61(14) | C22 | C21 | C20 | 120.74(15) |
| O1  | C16 | C17 | 109.82(13) | C22 | C21 | C23 | 123.12(15) |
| O2  | C16 | O1  | 123.82(15) | C20 | C21 | C23 | 116.11(14) |
| O2  | C16 | C17 | 126.33(15) | C4  | C5  | C6  | 118.11(13) |
| C3  | C4  | C5  | 113.25(14) | O3  | C2  | C3  | 108.92(13) |
| C21 | C22 | C24 | 127.79(16) | O3  | C2  | C1  | 110.47(12) |
| C16 | C17 | C19 | 111.93(14) | O3  | C2  | C14 | 111.73(13) |
| C16 | C17 | C18 | 109.10(15) | C3  | C2  | C1  | 109.29(12) |
| C18 | C17 | C19 | 111.52(16) | C14 | C2  | C3  | 105.67(13) |
| O1  | C1  | C10 | 104.52(12) | C14 | C2  | C1  | 110.62(13) |
| O1  | C1  | C2  | 106.99(12) | O9  | C11 | O8  | 121.74(16) |
| C10 | C1  | C2  | 115.10(12) | O9  | C11 | C12 | 127.22(16) |
| C10 | C9  | C8  | 111.45(12) | O8  | C11 | C12 | 111.03(13) |
| C12 | C9  | C10 | 102.73(12) | O5  | C7  | C6  | 109.97(12) |
| C12 | C9  | C8  | 114.03(13) | O5  | C7  | C8  | 104.60(12) |
| O5  | C20 | C21 | 111.31(13) | C8  | C7  | C6  | 117.90(13) |
| O6  | C20 | O5  | 123.97(15) | O10 | C13 | C12 | 107.76(13) |
| O6  | C20 | C21 | 124.70(14) | C11 | C12 | C9  | 103.55(13) |
| O8  | C10 | C1  | 105.44(12) | C11 | C12 | C13 | 111.86(14) |
| O8  | C10 | C9  | 105.30(12) | C13 | C12 | C9  | 116.70(14) |
| C1  | C10 | C9  | 116.90(13) |     |     |     |            |

**Table S6.** Torsion angles for **1**.

| <b>A</b> | <b>B</b> | <b>C</b> | <b>D</b> | <b>Angle/°</b> |
|----------|----------|----------|----------|----------------|
| O7       | C8       | C7       | O5       | -56.98(14)     |
| O7       | C8       | C7       | C6       | -179.48(13)    |
| O9       | C11      | C12      | C9       | 166.79(17)     |
| O9       | C11      | C12      | C13      | 40.3(2)        |
| O1       | C16      | C17      | C19      | -166.24(16)    |
| O1       | C16      | C17      | C18      | 69.84(18)      |
| O1       | C1       | C10      | O8       | 62.35(14)      |
| O1       | C1       | C10      | C9       | 178.91(12)     |
| O1       | C1       | C2       | O3       | 71.59(15)      |
| O1       | C1       | C2       | C3       | -168.59(11)    |
| O1       | C1       | C2       | C14      | -52.64(16)     |
| O8       | C11      | C12      | C9       | -14.50(18)     |
| O8       | C11      | C12      | C13      | -141.00(15)    |

|     |     |     |     |             |
|-----|-----|-----|-----|-------------|
| O5  | C20 | C21 | C22 | -136.38(15) |
| O5  | C20 | C21 | C23 | 45.54(18)   |
| O4  | C3  | C4  | C5  | -31.3(2)    |
| O4  | C3  | C2  | O3  | 166.35(14)  |
| O4  | C3  | C2  | C1  | 45.58(18)   |
| O4  | C3  | C2  | C14 | -73.48(18)  |
| O6  | C20 | C21 | C22 | 44.9(2)     |
| O6  | C20 | C21 | C23 | -133.14(16) |
| O10 | C13 | C12 | C9  | -54.60(18)  |
| O10 | C13 | C12 | C11 | 64.38(18)   |
| O2  | C16 | C17 | C19 | 15.7(3)     |
| O2  | C16 | C17 | C18 | -108.2(2)   |
| C3  | C4  | C5  | C6  | -49.35(19)  |
| C16 | O1  | C1  | C10 | -122.68(14) |
| C16 | O1  | C1  | C2  | 114.81(14)  |
| C4  | C3  | C2  | O3  | -18.02(18)  |
| C4  | C3  | C2  | C1  | -138.78(14) |
| C4  | C3  | C2  | C14 | 102.15(16)  |
| C1  | O1  | C16 | O2  | 0.2(2)      |
| C1  | O1  | C16 | C17 | -177.94(14) |
| C9  | C8  | C7  | O5  | -177.61(12) |
| C9  | C8  | C7  | C6  | 59.89(17)   |
| C20 | O5  | C7  | C6  | -117.64(14) |
| C20 | O5  | C7  | C8  | 114.84(13)  |
| C10 | O8  | C11 | O9  | 177.26(16)  |
| C10 | O8  | C11 | C12 | -1.53(18)   |
| C10 | C1  | C2  | O3  | -44.05(17)  |
| C10 | C1  | C2  | C3  | 75.77(15)   |
| C10 | C1  | C2  | C14 | -168.28(13) |
| C10 | C9  | C8  | O7  | 80.58(15)   |
| C10 | C9  | C8  | C7  | -160.30(13) |
| C10 | C9  | C12 | C11 | 23.22(15)   |
| C10 | C9  | C12 | C13 | 146.59(13)  |
| C8  | C9  | C10 | O8  | -147.11(12) |
| C8  | C9  | C10 | C1  | 96.26(16)   |
| C8  | C9  | C12 | C11 | 143.96(13)  |
| C8  | C9  | C12 | C13 | -92.67(16)  |
| C24 | C22 | C21 | C20 | 3.5(3)      |
| C24 | C22 | C21 | C23 | -178.58(17) |
| C5  | C6  | C7  | O5  | -51.08(17)  |



|     |     |     |     |             |
|-----|-----|-----|-----|-------------|
| C5  | C6  | C7  | C8  | 68.65(18)   |
| C2  | C3  | C4  | C5  | 153.18(13)  |
| C2  | C1  | C10 | O8  | 179.39(12)  |
| C2  | C1  | C10 | C9  | -64.05(18)  |
| C11 | O8  | C10 | C1  | 141.18(13)  |
| C11 | O8  | C10 | C9  | 16.97(16)   |
| C7  | O5  | C20 | O6  | 19.8(2)     |
| C7  | O5  | C20 | C21 | -158.93(12) |
| C7  | C6  | C5  | C4  | -55.82(19)  |
| C15 | C6  | C5  | C4  | -179.80(14) |
| C15 | C6  | C7  | O5  | 72.30(16)   |
| C15 | C6  | C7  | C8  | -167.97(14) |
| C12 | C9  | C10 | O8  | -24.61(15)  |
| C12 | C9  | C10 | C1  | -141.24(14) |
| C12 | C9  | C8  | O7  | -35.17(17)  |
| C12 | C9  | C8  | C7  | 83.96(16)   |
| C25 | O10 | C13 | C12 | 170.14(15)  |

**Table S7.** Hydrogen atom coordinates ( $\text{\AA}\times 10^4$ ) and isotropic displacement parameters ( $\text{\AA}^2\times 10^3$ ) for **1**.

| Atom | <i>x</i> | <i>y</i> | <i>z</i> | U(eq) |
|------|----------|----------|----------|-------|
| H7   | 1006     | 7981     | 1486     | 24    |
| H3   | -3575    | 7507     | 1268     | 26    |
| H4A  | -1965    | 8259     | 3327     | 20    |
| H4B  | -3263    | 8650     | 3943     | 20    |
| H22  | 4734     | 6080     | 5065     | 25    |
| H17  | -4931    | 9024     | -2000    | 27    |
| H1   | -3456    | 10714    | 852      | 16    |
| H9   | -874     | 10845    | 1902     | 16    |
| H10  | -1305    | 8946     | 456      | 16    |
| H6   | -557     | 10990    | 3523     | 22    |
| H8   | -592     | 8646     | 2309     | 16    |
| H24A | 5086     | 7333     | 6516     | 39    |
| H24B | 4704     | 8456     | 5810     | 39    |
| H24C | 6216     | 7774     | 5782     | 39    |
| H5A  | -866     | 9034     | 4852     | 24    |
| H5B  | -1888    | 10170    | 4745     | 24    |
| H7A  | 1772     | 10152    | 3190     | 17    |
| H15A | 1641     | 11415    | 4615     | 41    |
| H15B | 1368     | 10302    | 5301     | 41    |
| H15C | 280      | 11404    | 5248     | 41    |

|      |       |       |       |    |
|------|-------|-------|-------|----|
| H19A | -7397 | 10608 | -2156 | 47 |
| H19B | -6994 | 9779  | -3048 | 47 |
| H19C | -5943 | 10850 | -2661 | 47 |
| H18A | -6125 | 7901  | -842  | 64 |
| H18B | -7156 | 7973  | -1896 | 64 |
| H18C | -7488 | 8784  | -974  | 64 |
| H23A | 2967  | 6523  | 2778  | 33 |
| H23B | 1698  | 6265  | 3461  | 33 |
| H23C | 3171  | 5506  | 3611  | 33 |
| H13A | 2146  | 11727 | 2079  | 28 |
| H13B | 2201  | 12310 | 991   | 28 |
| H12  | 1545  | 10256 | 832   | 21 |
| H25A | 1811  | 14128 | 1952  | 52 |
| H25B | 1415  | 13450 | 2930  | 52 |
| H25C | 250   | 14321 | 2330  | 52 |
| H14A | -5762 | 8621  | 996   | 35 |
| H14B | -5752 | 9862  | 1562  | 35 |
| H14C | -5631 | 8666  | 2199  | 35 |

---

### Computational details

In general, conformational analyses were carried out via random searching in the Sybyl-X 2.0 using the MMFF94S force field with an energy cutoff of 2.5 kcal/mol.<sup>1</sup> Subsequently, the conformers were re-optimized using DFT at the b3lyp/6-31+g(d) level in gas phase by the GAUSSIAN 09 program.<sup>2</sup> The energies, oscillator strengths, and rotational strengths (velocity) of the first 100 electronic excitations were calculated using the TDDFT methodology at the b3lyp/6-311++g (d,p) level in vacuum. The ECD spectra were simulated by the overlapping Gaussian function (half the bandwidth at 1/e peak height,  $\sigma = 0.3$  for 1 and hjb-24, and 0.35 for hjb-10).<sup>3</sup> To get the final spectra, the simulated spectra of the conformers were averaged according to the Boltzmann distribution theory and their relative Gibbs free energy ( $\Delta G$ ). Theoretical ECD spectrum of the corresponding enantiomer was obtained by directly inverse of the ECD spectrum of the above-mentioned compounds,

respectively. By comparing the experiment spectrum with the calculated ECD spectra, the eight chiral centers of **5J** and **7J** were determined to be 4*R*, 5*R*, 6*S*, 7*R*, 8*R*, 9*R*, 10*R*, and 11*R*.

**Reference:**

- (1) Sybyl Software, version X 2.0; Tripos Associates Inc.: St. Louis, MO, 2013.
- (2) Frisch, M. J.; Trucks, G. W.; Schlegel, H. B.; Scuseria, G. E.; Robb, M. A.; Cheeseman, J. R.; Scalmani, G.; Barone, V.; Mennucci, B.; Petersson, G. A.; Nakatsuji, H.; Caricato, M.; Li, X.; Hratchian, H. P.; Izmaylov, A. F.; Bloino, J.; Zheng, G.; Sonnenberg, J. L.; Hada, M.; Ehara, M.; Toyota, K.; Fukuda, R.; Hasegawa, J.; Ishida, M.; Nakajima, T.; Honda, Y.; Kitao, O.; Nakai, H.; Vreven, T.; Montgomery, Jr., J. A.; Peralta, J. E.; Ogliaro, F.; Bearpark, M.; Heyd, J. J.; Brothers, E.; Kudin, K. N.; Staroverov, V. N.; Kobayashi, R.; Normand, J.; Raghavachari, K.; Rendell, A.; Burant, J. C.; Iyengar, S. S.; Tomasi, J.; Cossi, M.; Rega, N.; Millam, J. M.; Klene, M.; Knox, J. E.; Cross, J. B.; Bakken, V.; Adamo, C.; Jaramillo, J.; Gomperts, R.; Stratmann, R. E.; Yazyev, O.; Austin, A. J.; Cammi, R.; Pomelli, C.; Ochterski, J. W.; Martin, R. L.; Morokuma, K.; Zakrzewski, V. G.; Voth, G. A.; Salvador, P.; Dannenberg, J. J.; Dapprich, S.; Daniels, A. D.; Farkas, Ö.; Foresman, J. B.; Ortiz, J. V.; Cioslowski, J.; Fox, D. J. Gaussian 09, Rev. C 01; Gaussian, Inc., Wallingford CT, 2009.
- (3) Stephens, P. J.; Harada, N. ECD cotton effect approximated by the Gaussian curve and other methods. *Chirality*. 2010, 22, 229–233

**Table S8.** Conformational analysis of **5Ja**.

| No     | conformer                                                                            | population |
|--------|--------------------------------------------------------------------------------------|------------|
| 5Ja-C1 | 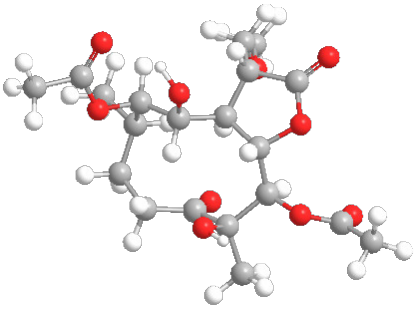   | 85.29%     |
| 5Ja-C2 |    | 3.92%      |
| 5Ja-C3 |   | 3.11%      |
| 5Ja-C4 |  | 2.67%      |
| 5Ja-C5 |  | 2.54%      |

**Table S9.** Conformational Analysis of **7Ja**.

| No     | conformer                                                                            | population |
|--------|--------------------------------------------------------------------------------------|------------|
| 7Ja-C1 | 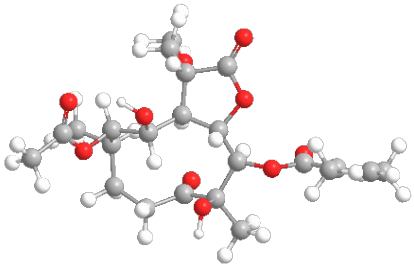   | 24.48%     |
| 7Ja-C2 |    | 21.67%     |
| 7Ja-C3 |   | 21.47%     |
| 7Ja-C4 |  | 8.63%      |
| 7Ja-C5 |  | 6.95%      |
| 7Ja-C6 |  | 5.88%      |

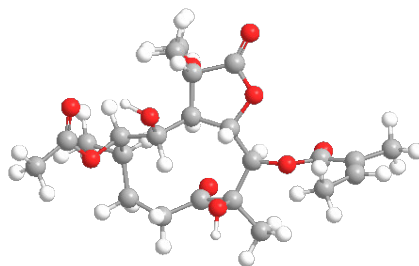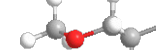

1.24%

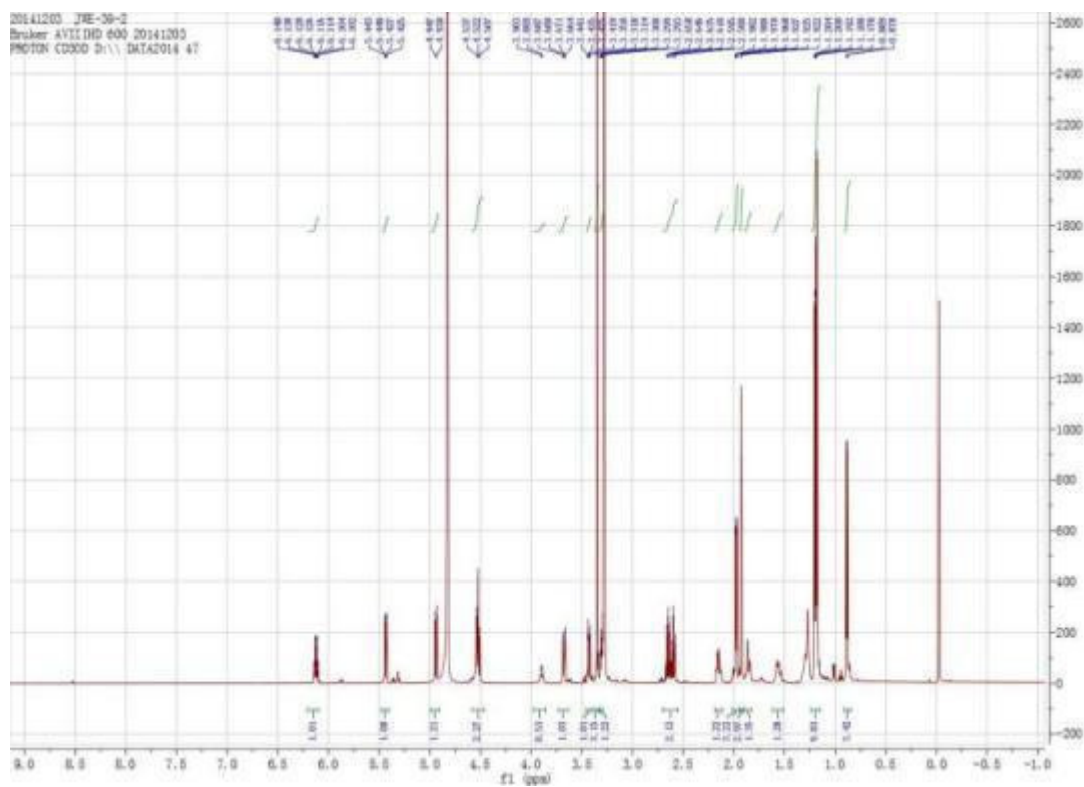

**Figure S1.1**  $^1\text{H}$  NMR spectrum of compound **1** in  $\text{CD}_3\text{OD}$ .



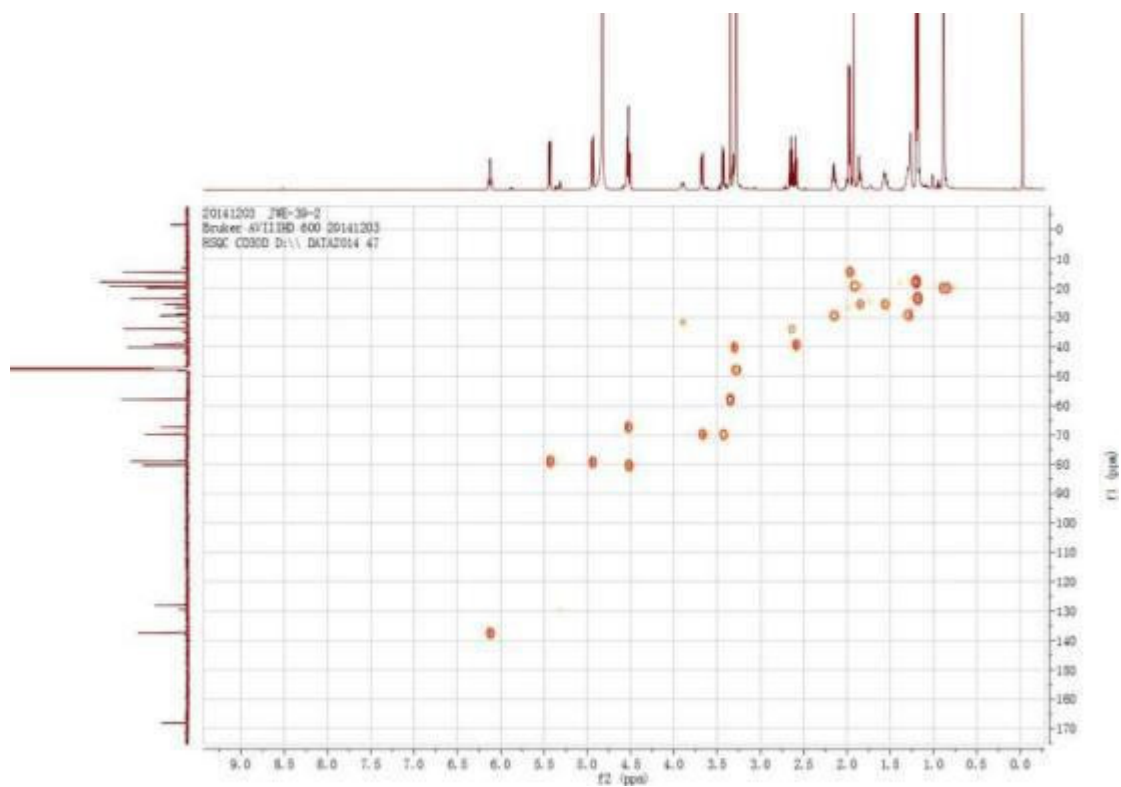

**Figure S1.4** HSQC spectrum of compound **1** in CD<sub>3</sub>OD.

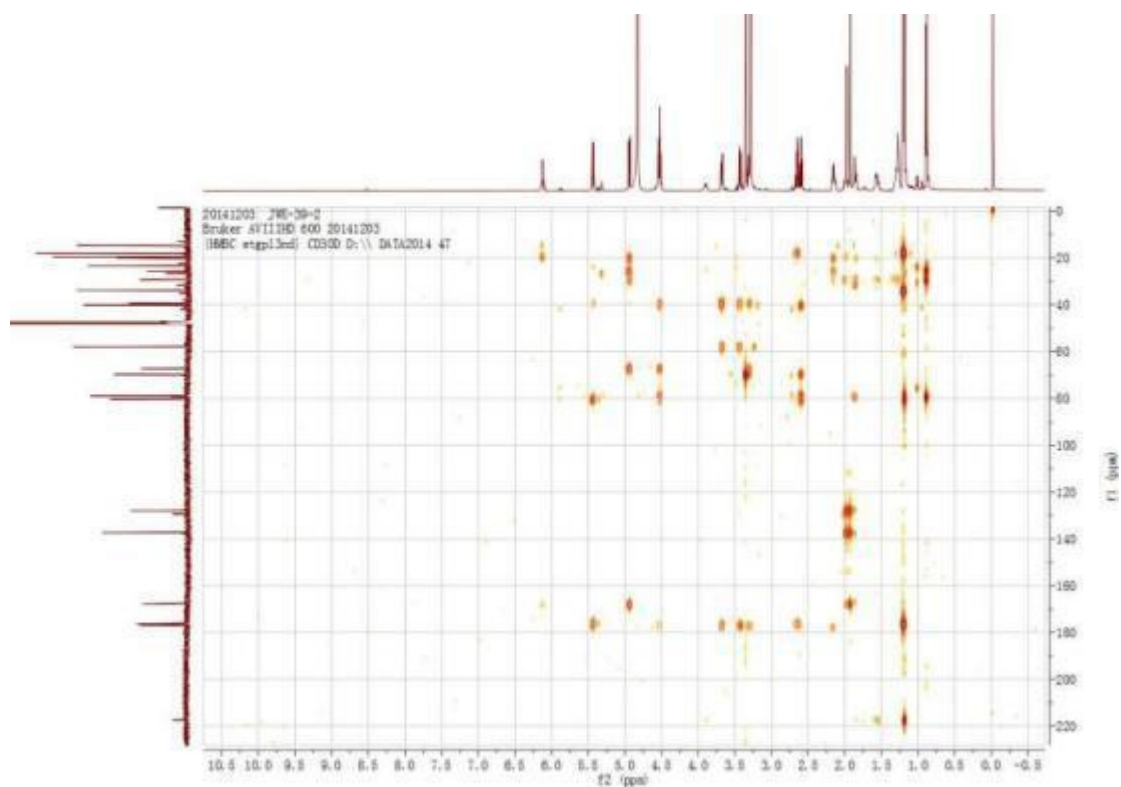

**Figure S1.5** HMBC spectrum of compound **1** in CD<sub>3</sub>OD.



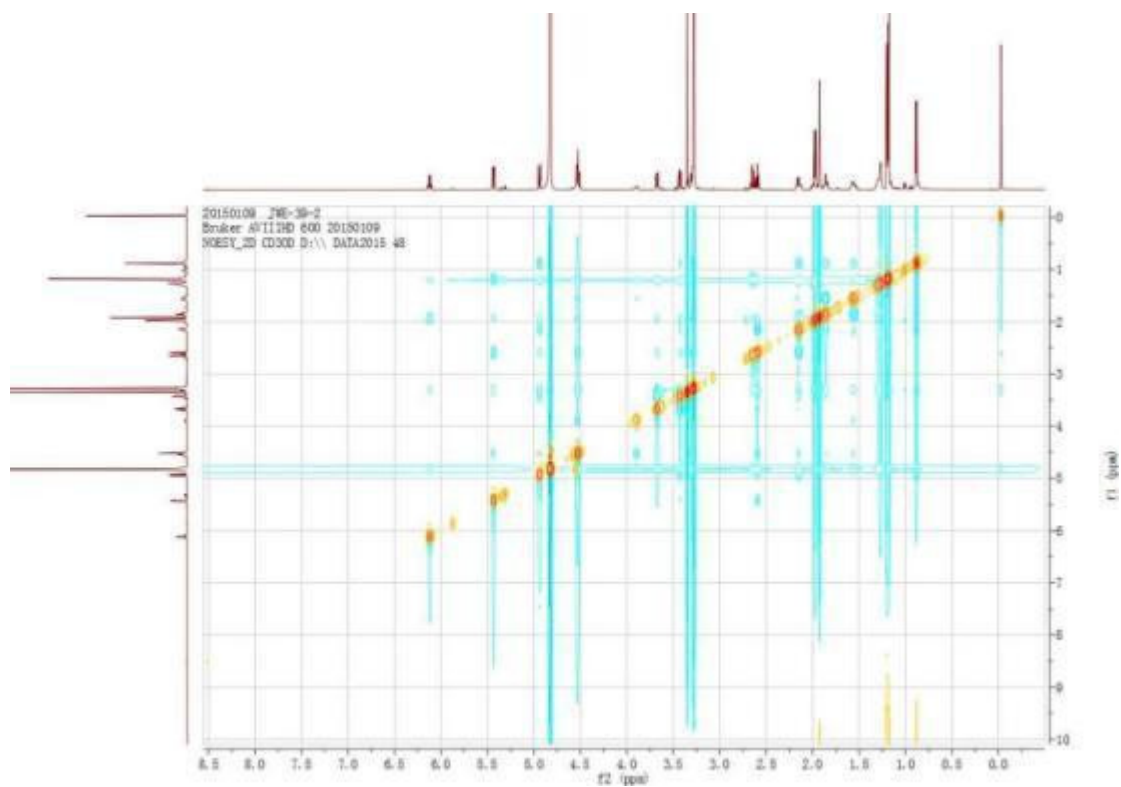

**Figure S1.6** NOESY spectrum of compound **1** in CD<sub>3</sub>OD.

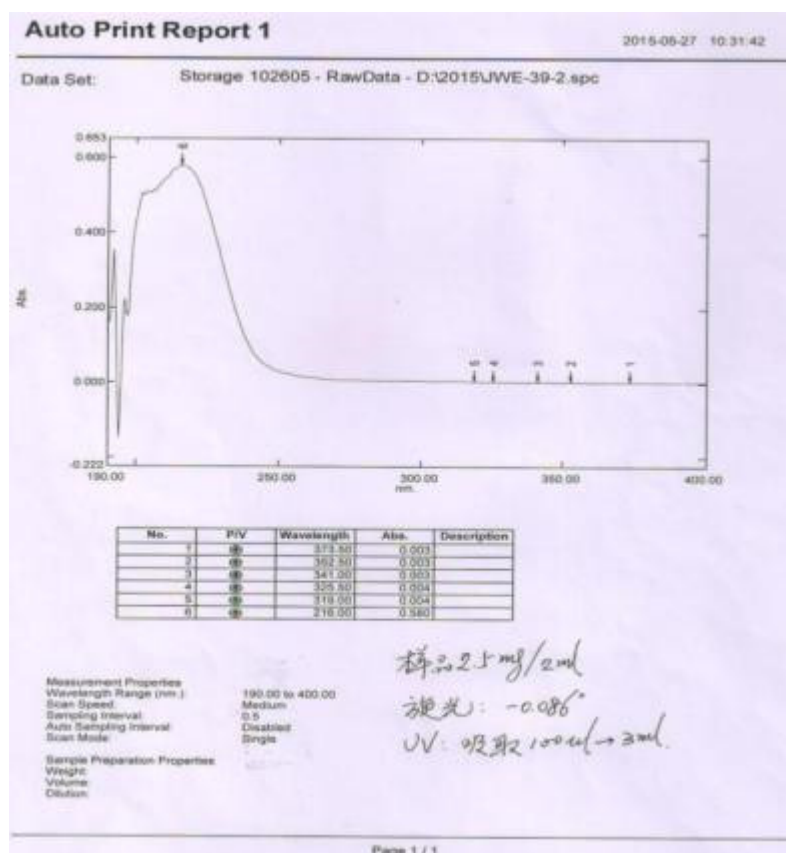

**Figure S1.7** UV spectrum of compound **1**.

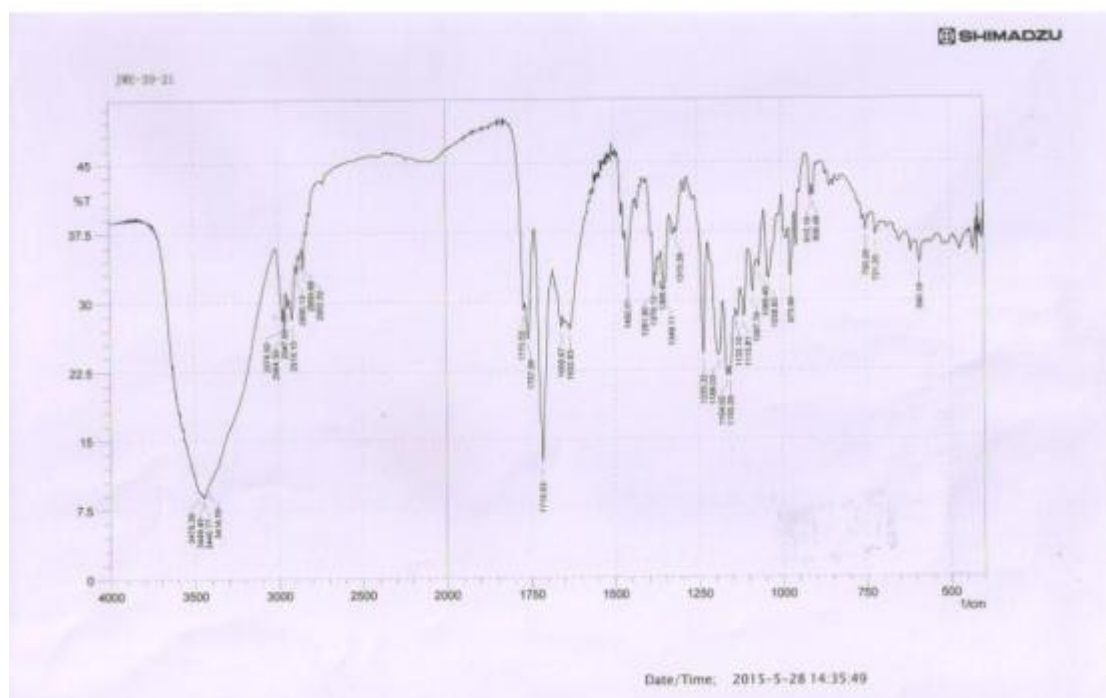

**Figure S1.8** IR spectrum of compound **1**.

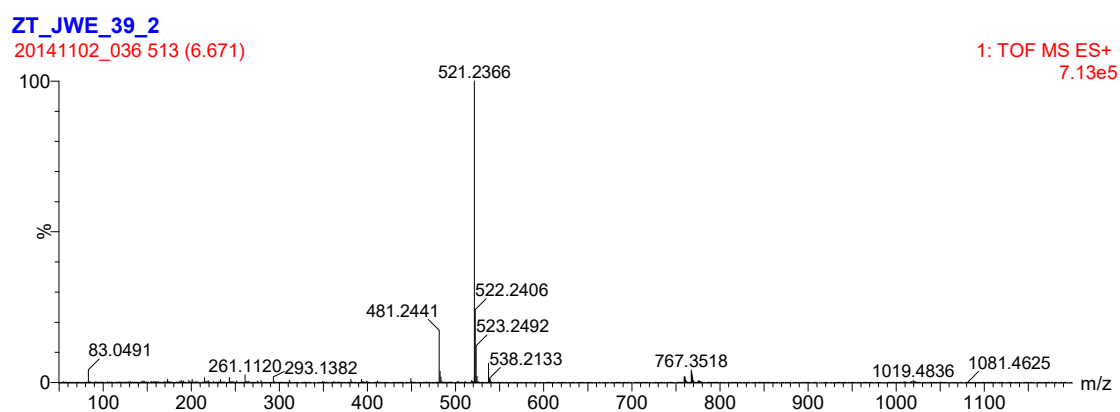

**Figure S1.9** HRESIMS spectrum of compound **1**.

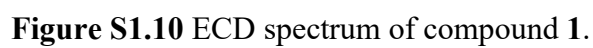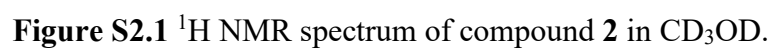

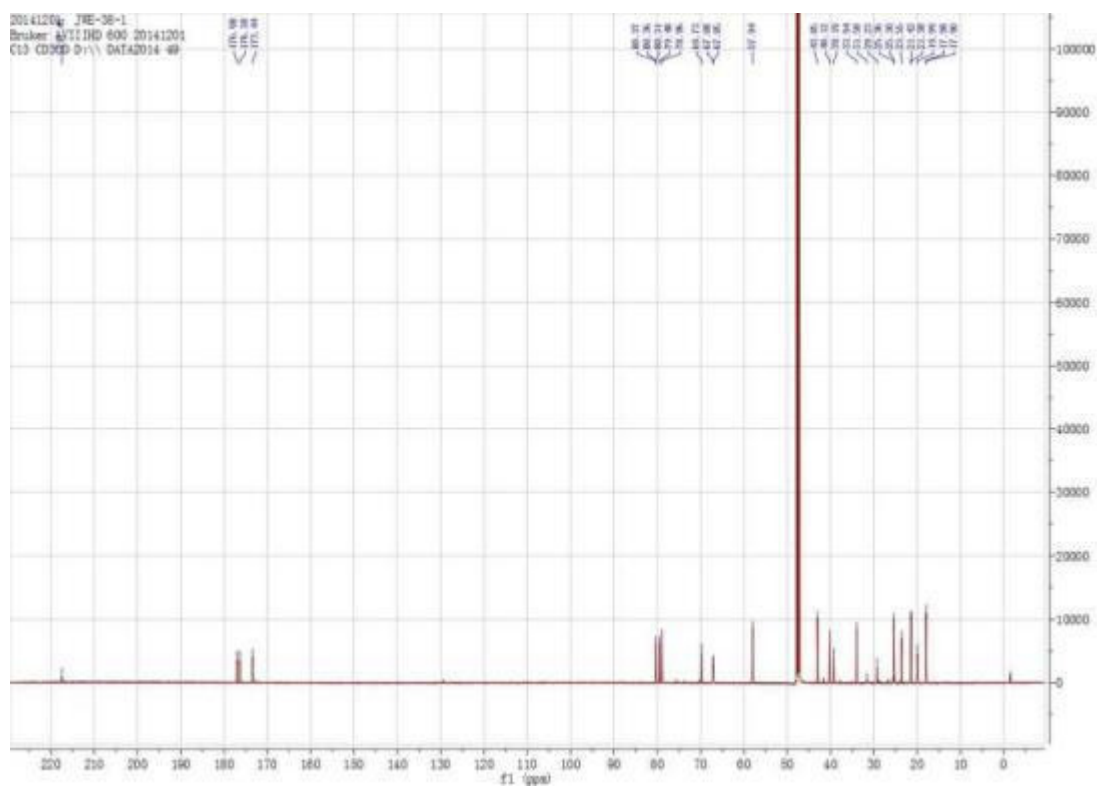

**Figure S2.2**  $^{13}\text{C}$  NMR spectrum of compound **2** in  $\text{CD}_3\text{OD}$ .

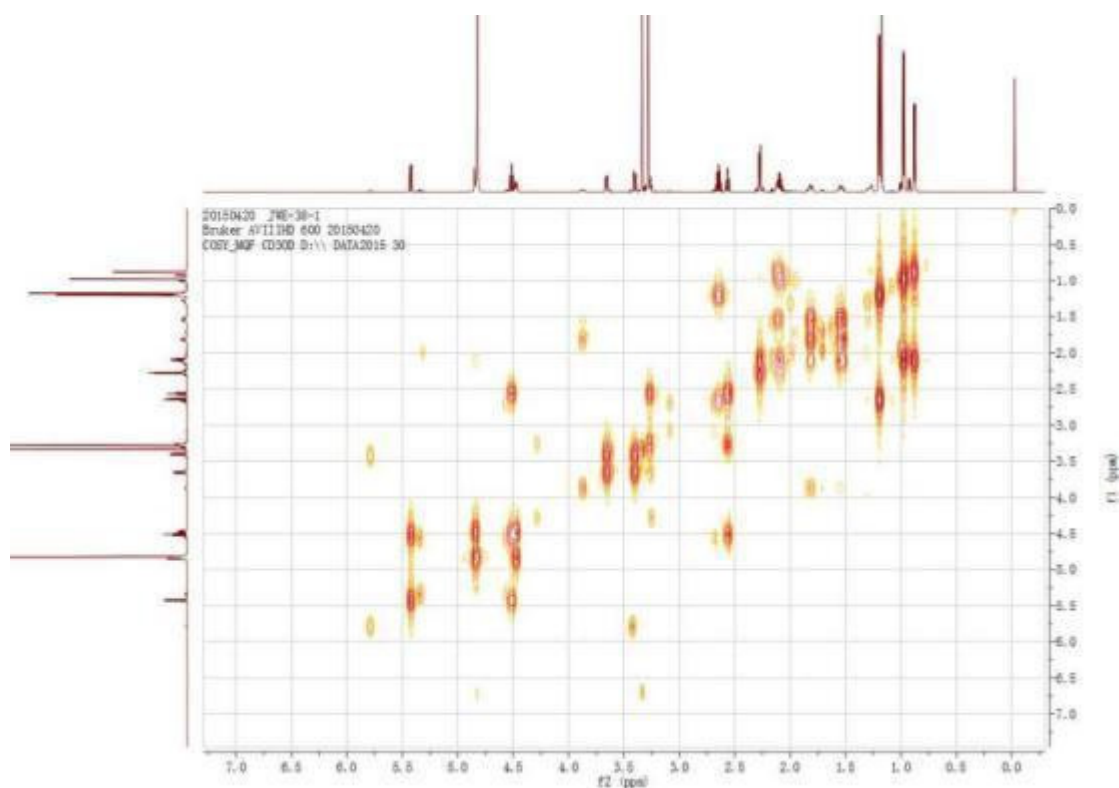

**Figure S2.3**  $^1\text{H}$ - $^1\text{H}$  COSY spectrum of compound **2** in  $\text{CD}_3\text{OD}$ .

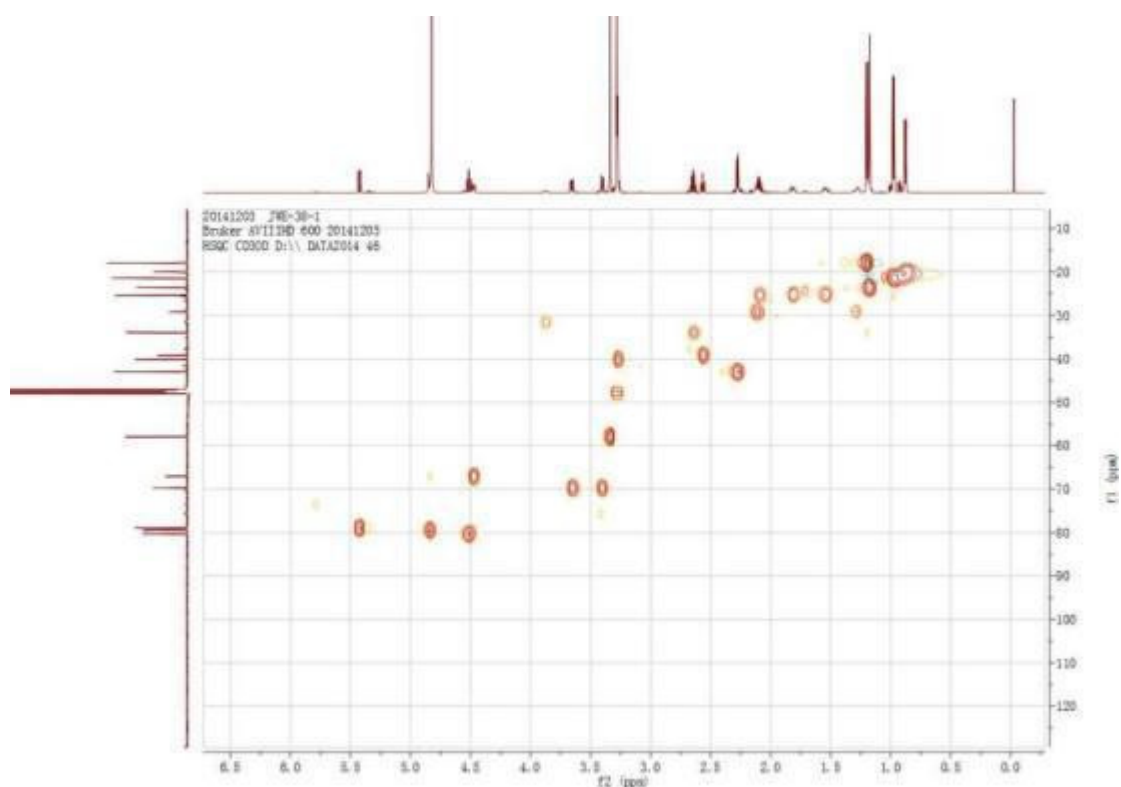

**Figure S2.4** HSQC spectrum of compound **2** in CD<sub>3</sub>OD.

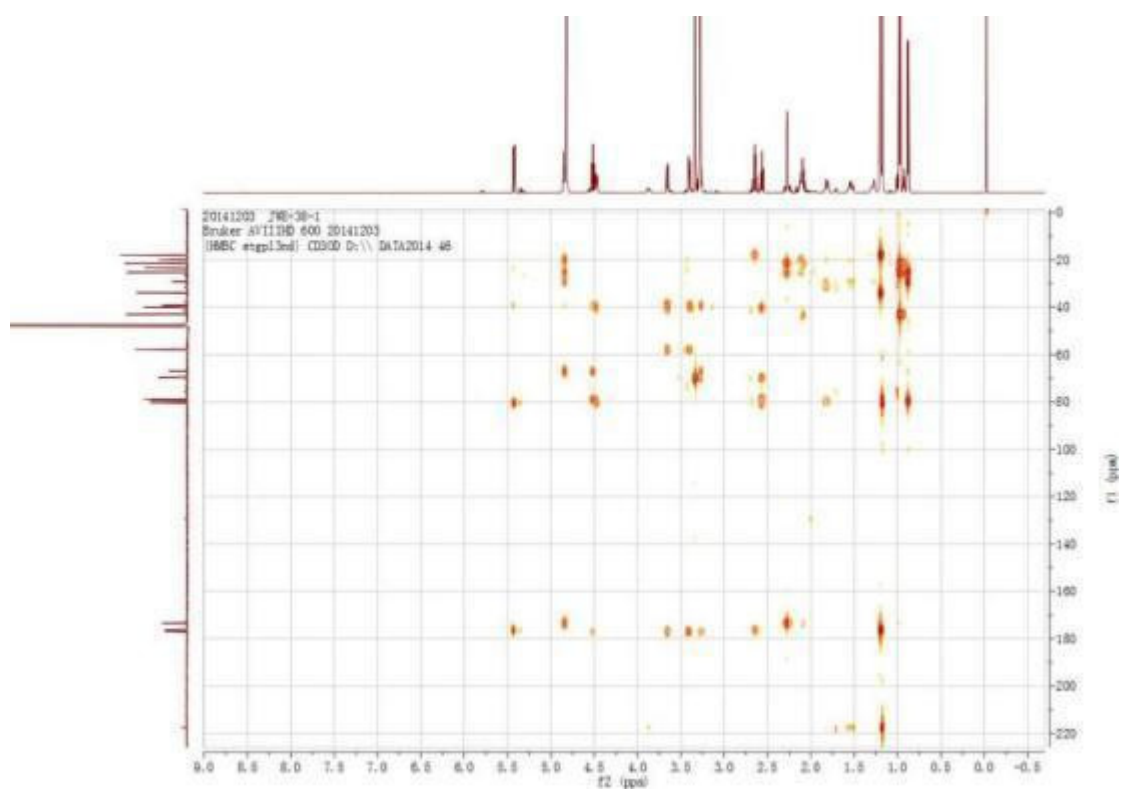

**Figure S2.5** HMBC spectrum of compound **2** in CD<sub>3</sub>OD.

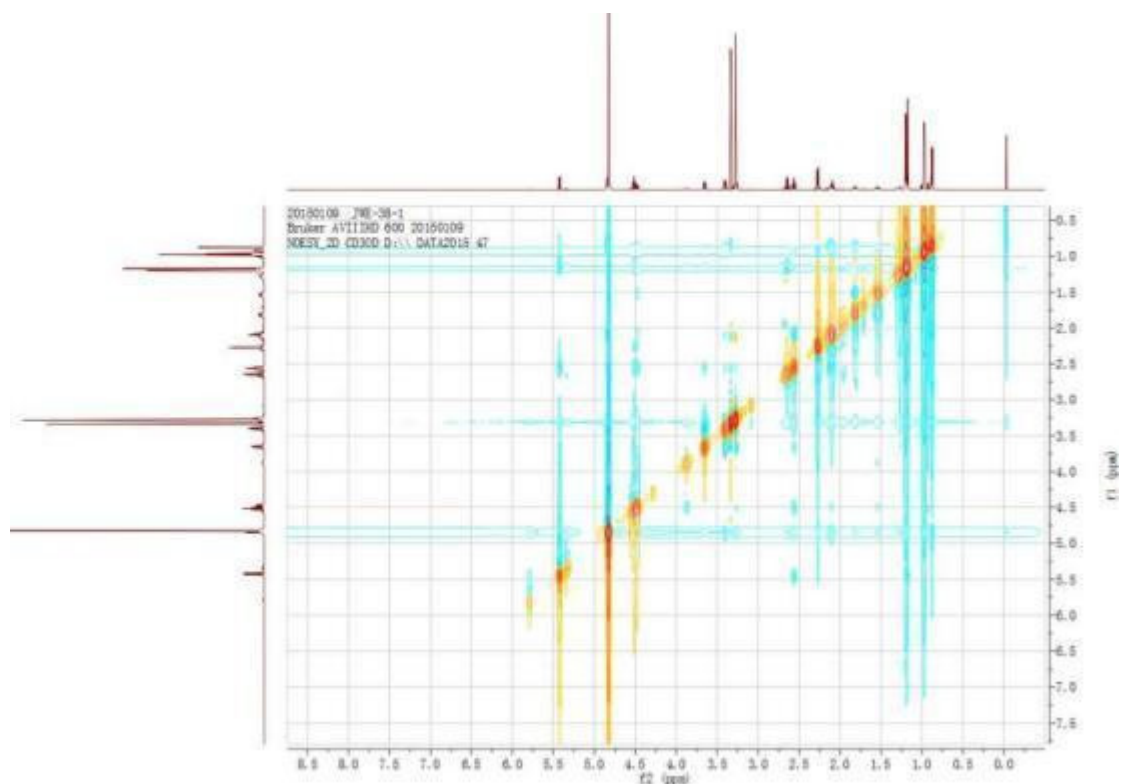

Figure S2.6 NOESY spectrum of compound **2** in CD<sub>3</sub>OD.

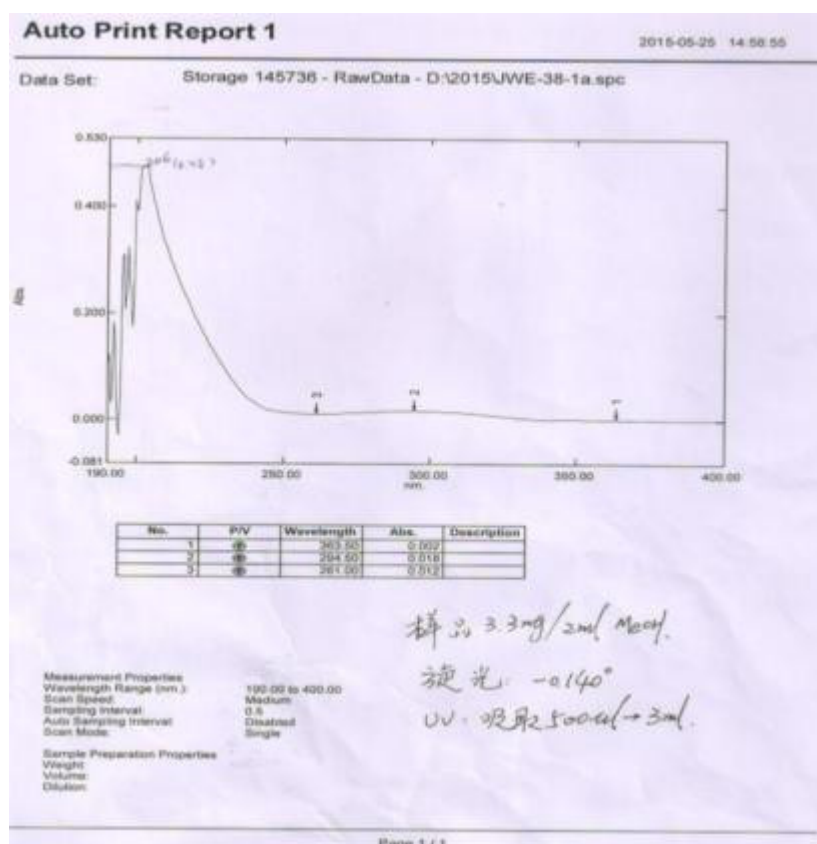

Figure S2.7 UV spectrum of compound **2**.

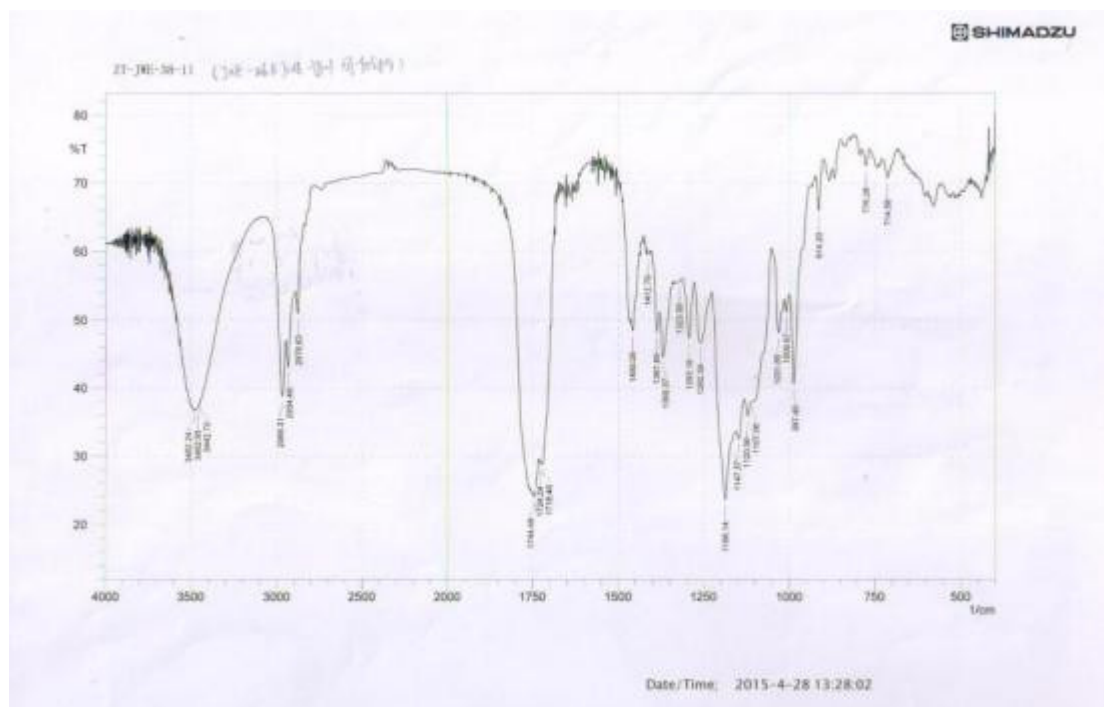

**Figure S2.8** IR spectrum of compound **2**.

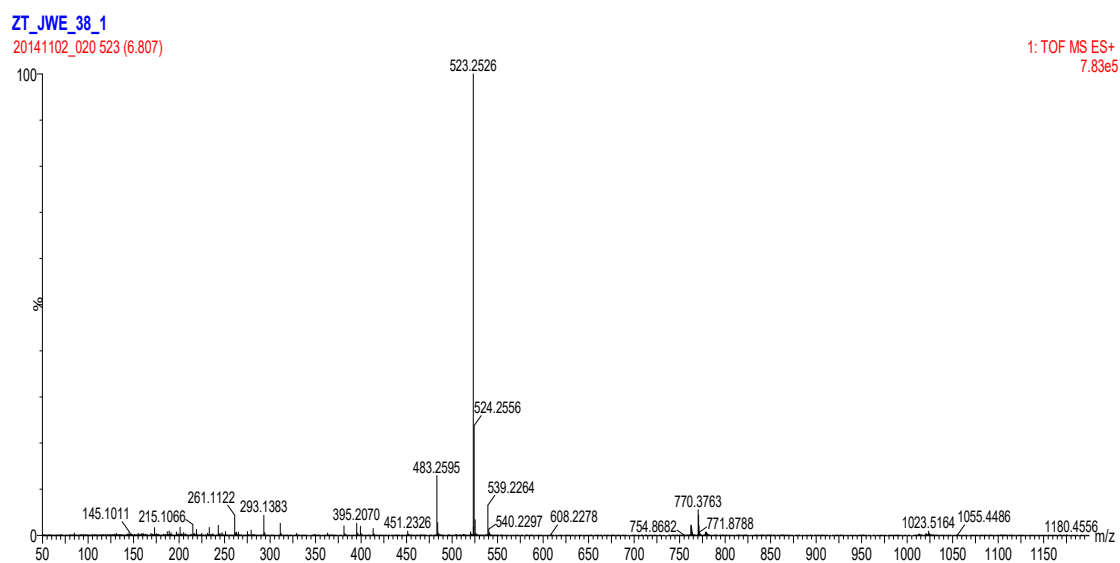

**Figure S2.9** HRESIMS spectrum of compound **2**.



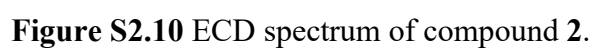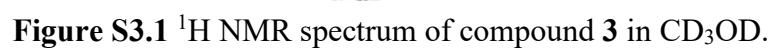



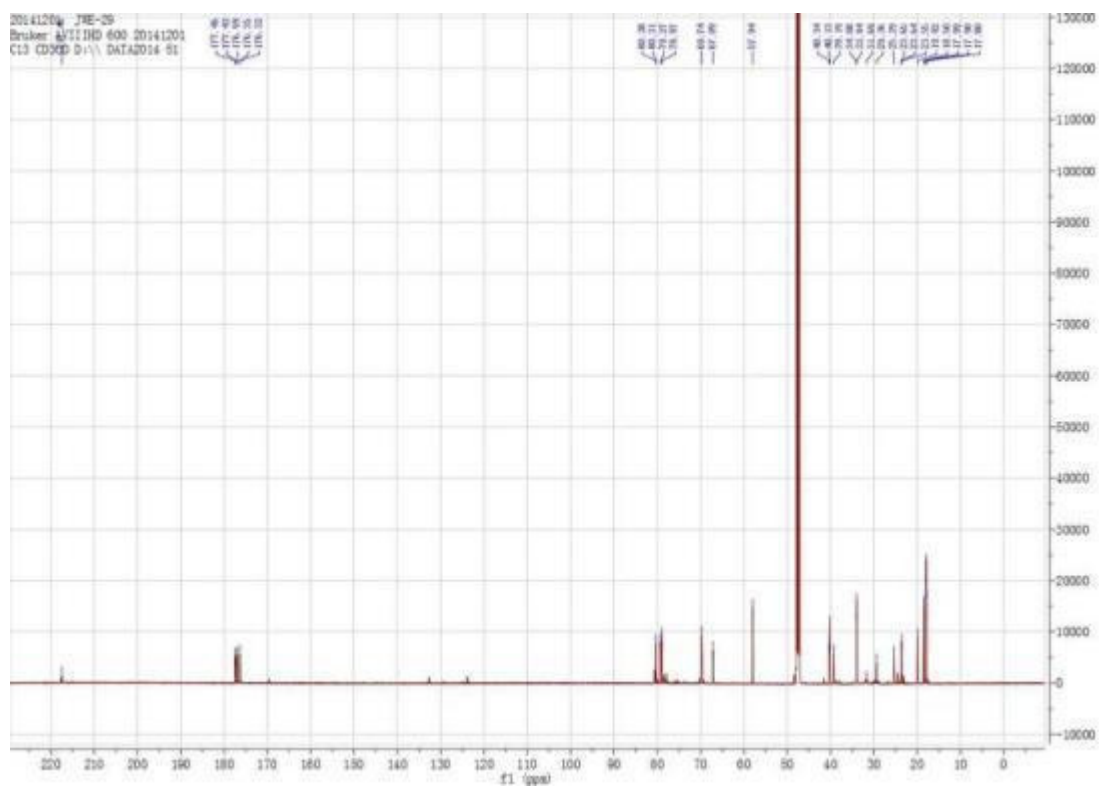

**Figure S3.2**  $^{13}\text{C}$  NMR spectrum of compound **3** in CD<sub>3</sub>OD.

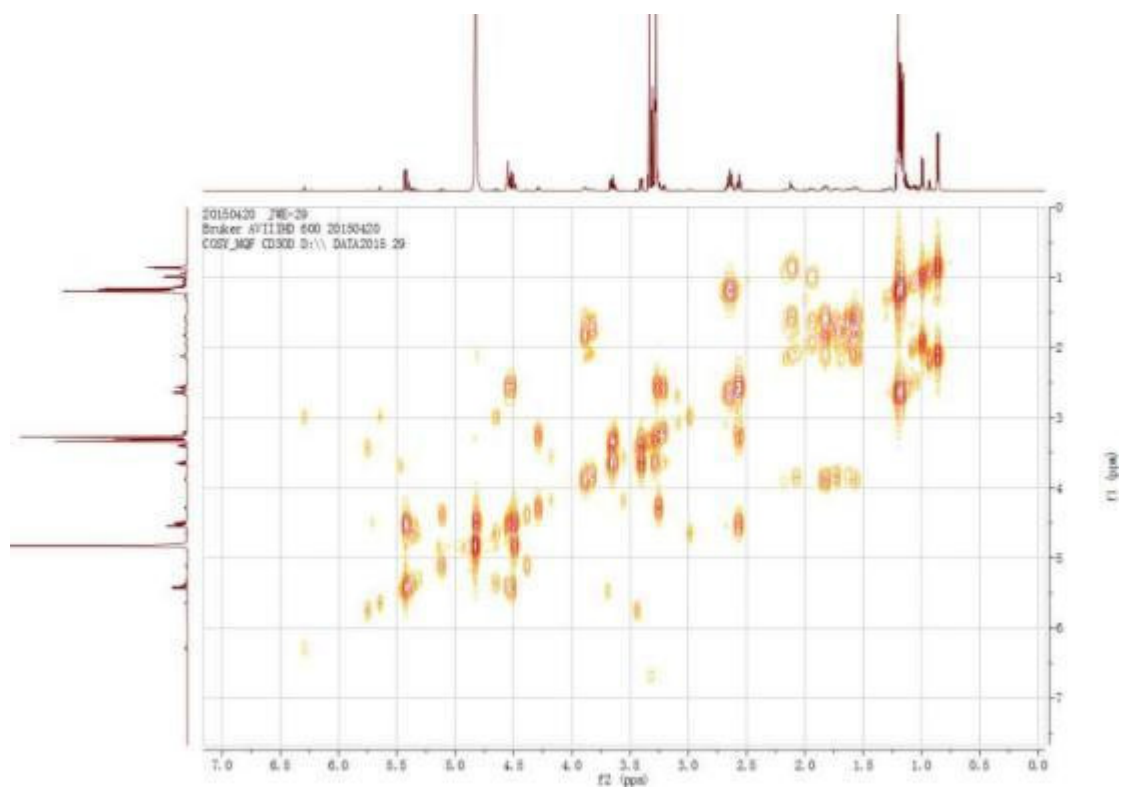

**Figure S3.3**  $^1\text{H}$ - $^1\text{H}$  COSY spectrum of compound **3** in CD<sub>3</sub>OD.

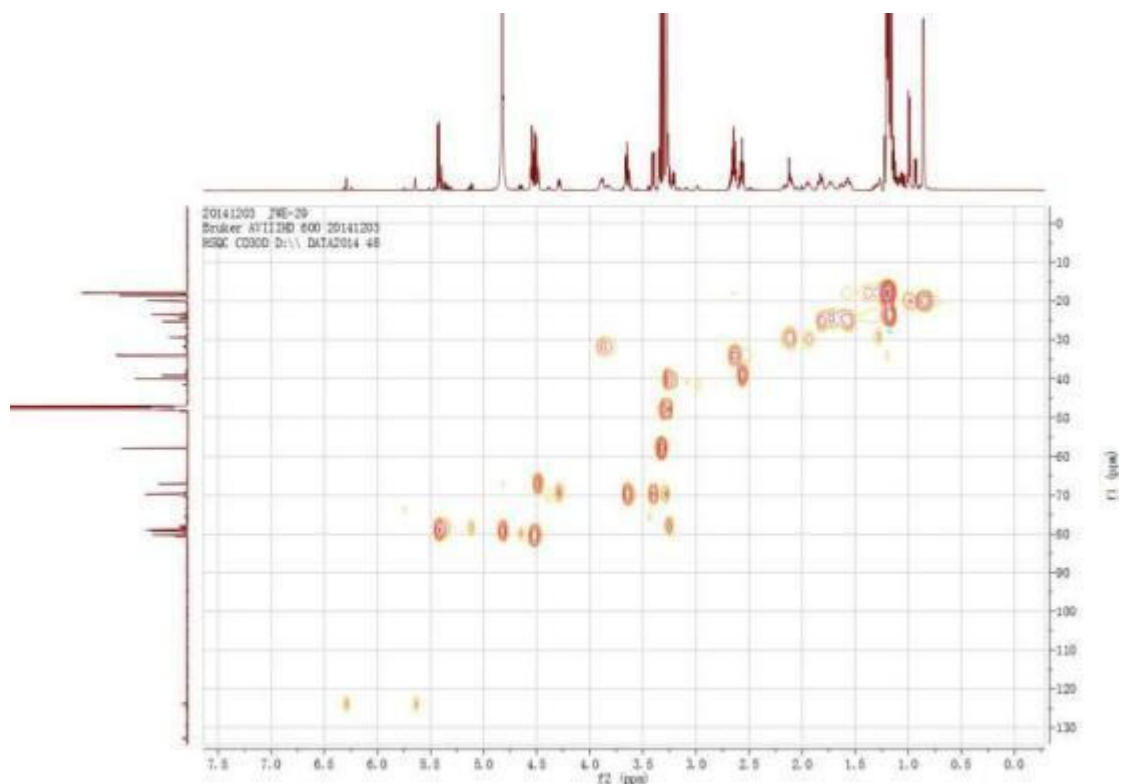

**Figure S3.4** HSQC spectrum of compound **3** in CD<sub>3</sub>OD.

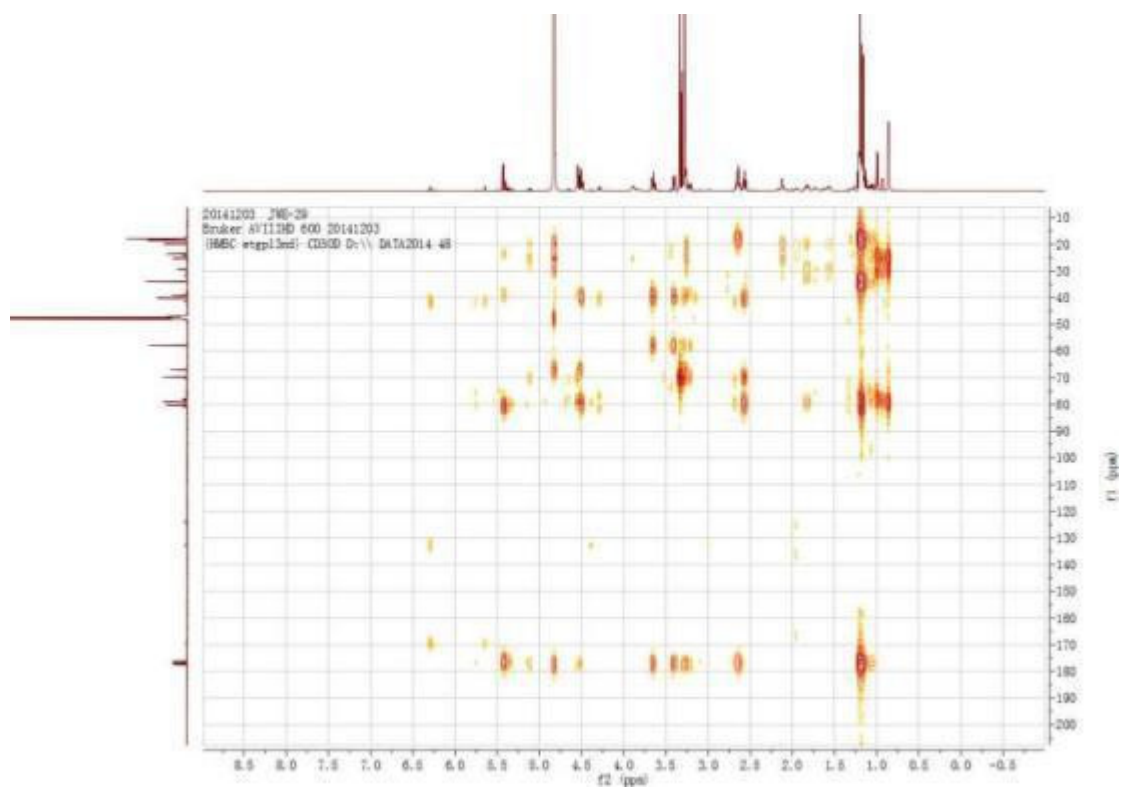

**Figure S3.5** HMBC spectrum of compound **3** in CD<sub>3</sub>OD.

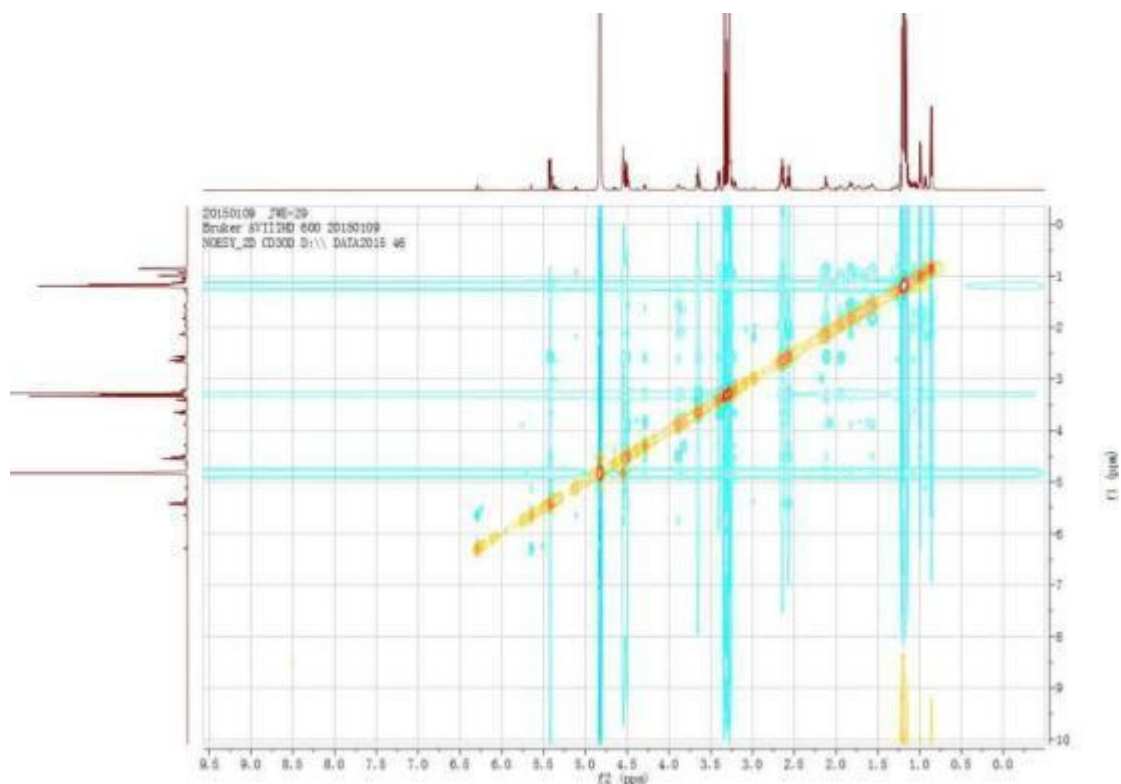

**Figure S3.6** NOESY spectrum of compound **3** in CD<sub>3</sub>OD.

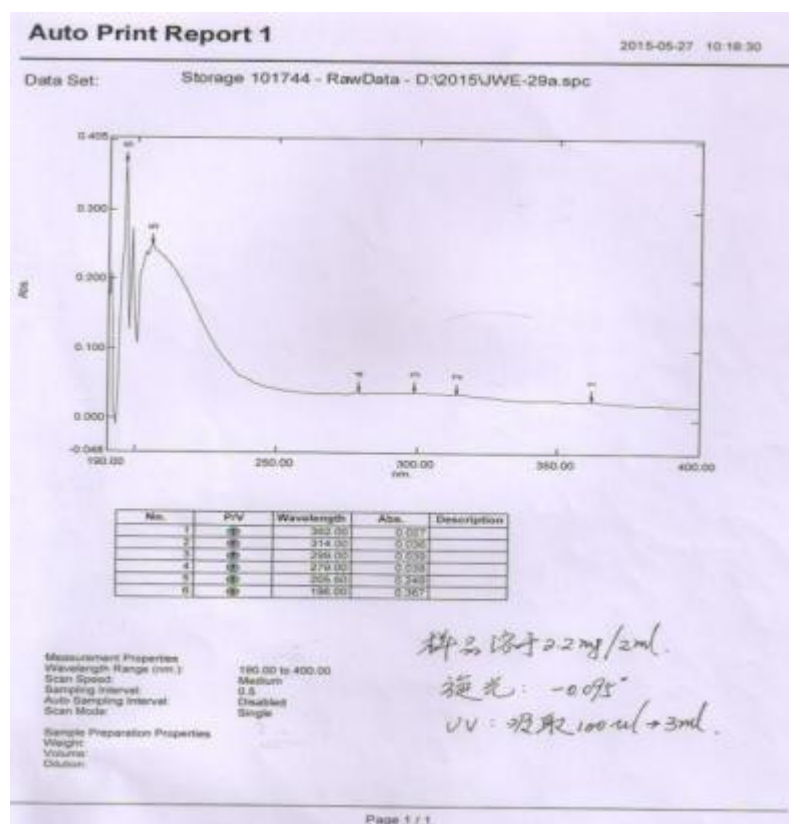

**Figure S3.7** UV spectrum of compound **3**.

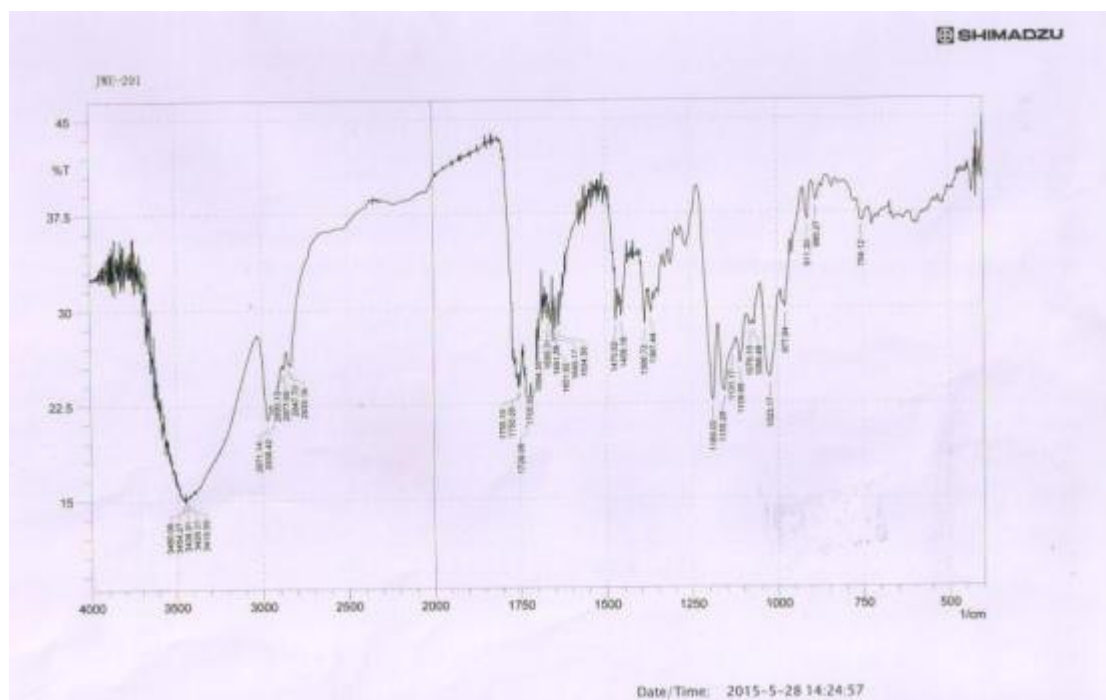

**Figure S3.8** IR spectrum of compound **3**.

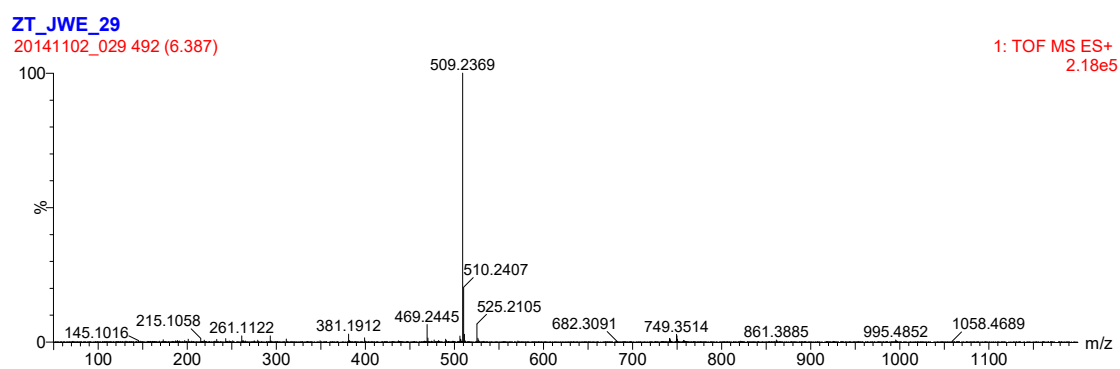

**Figure S3.9** HRESIMS spectrum of compound **3**.

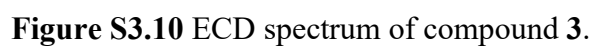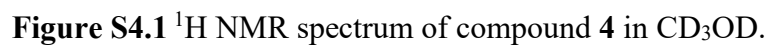

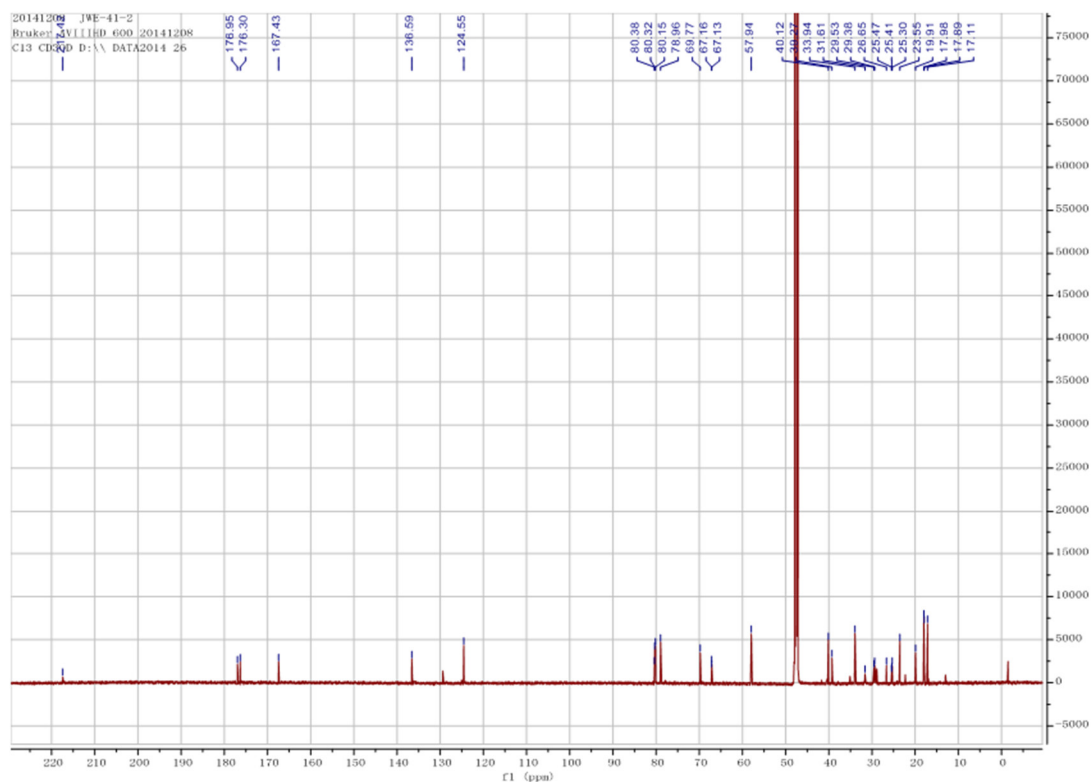

**Figure S4.2**  $^{13}\text{C}$  NMR spectrum of compound **4** in  $\text{CD}_3\text{OD}$ .

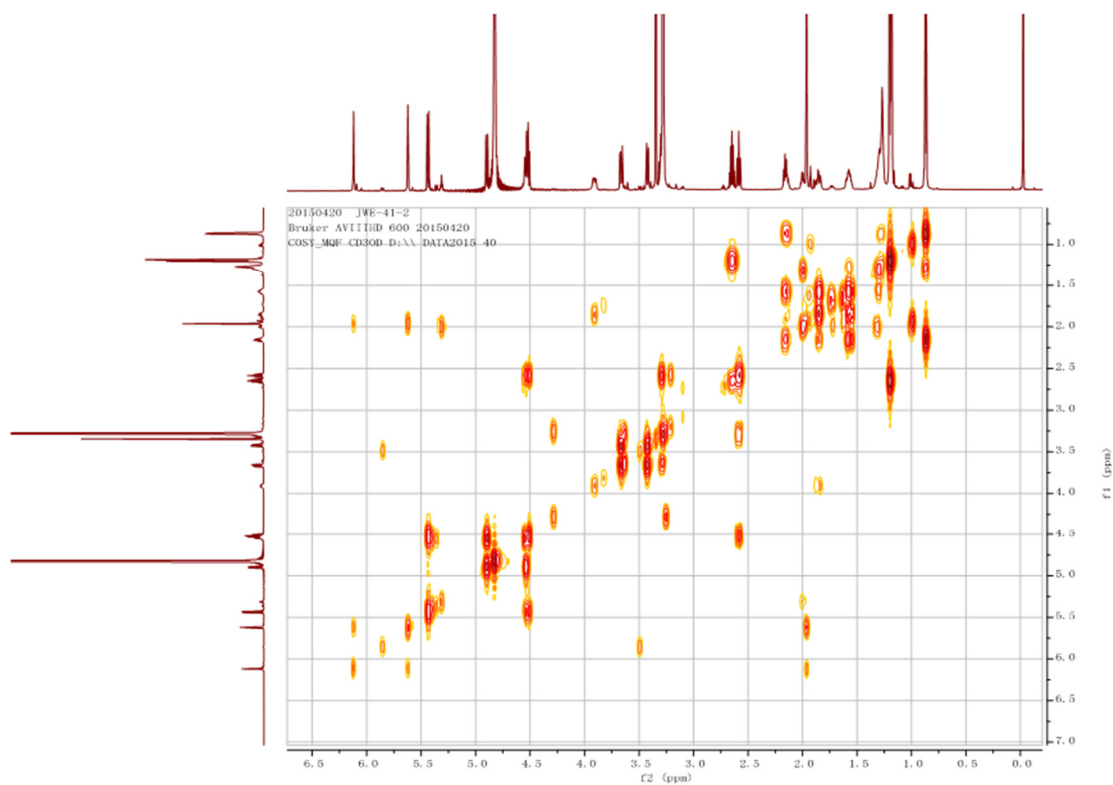

**Figure S4.3**  $^1\text{H}$ - $^1\text{H}$  COSY spectrum of compound **4** in  $\text{CD}_3\text{OD}$ .

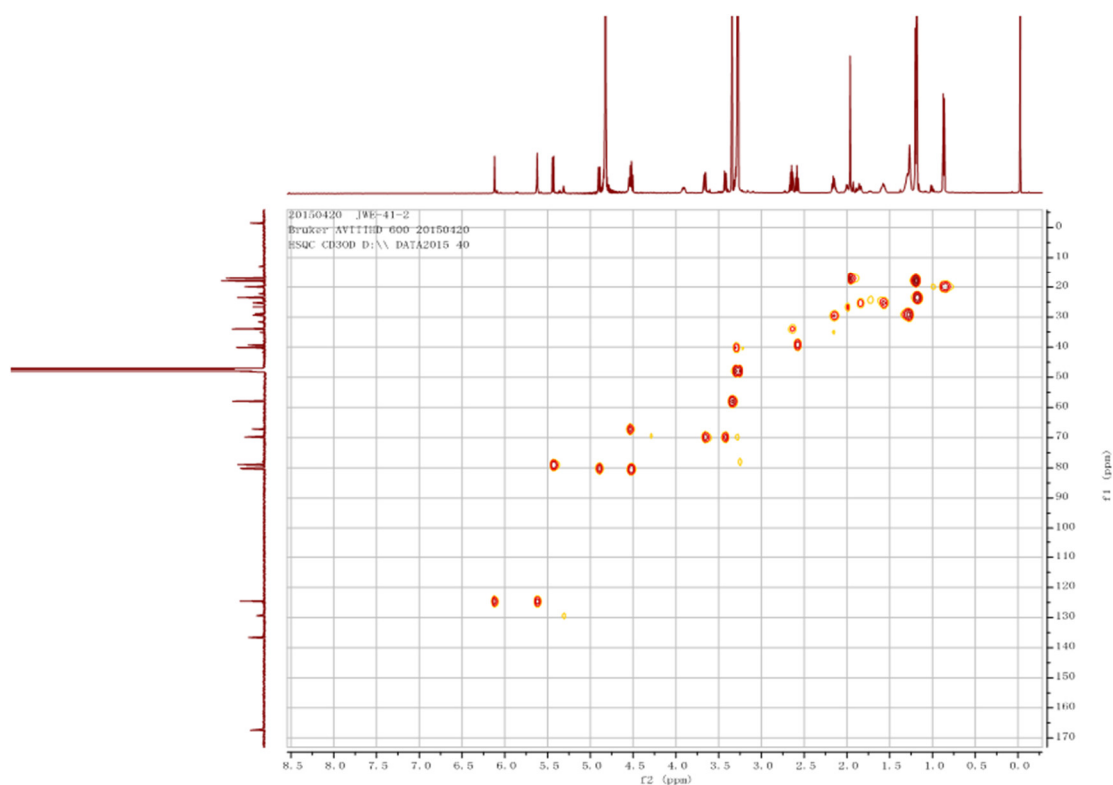

**Figure S4.4** HSQC spectrum of compound **4** in CD<sub>3</sub>OD.

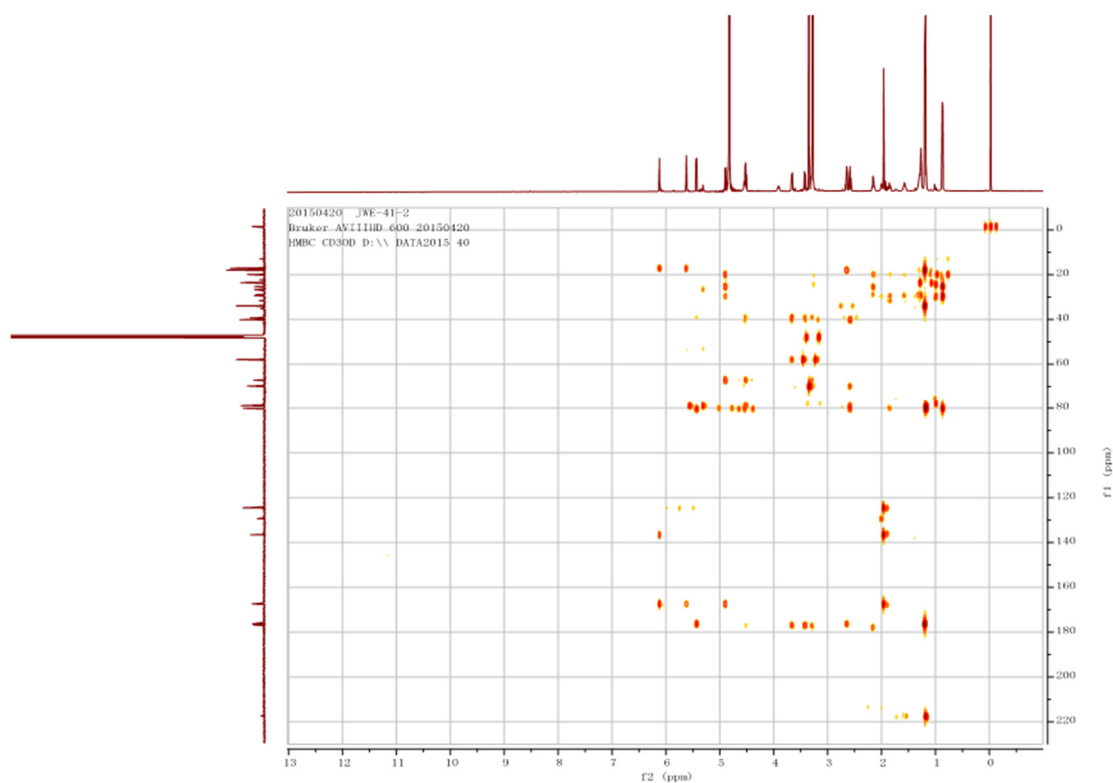

**Figure S4.5** HMBC spectrum of compound **4** in CD<sub>3</sub>OD.

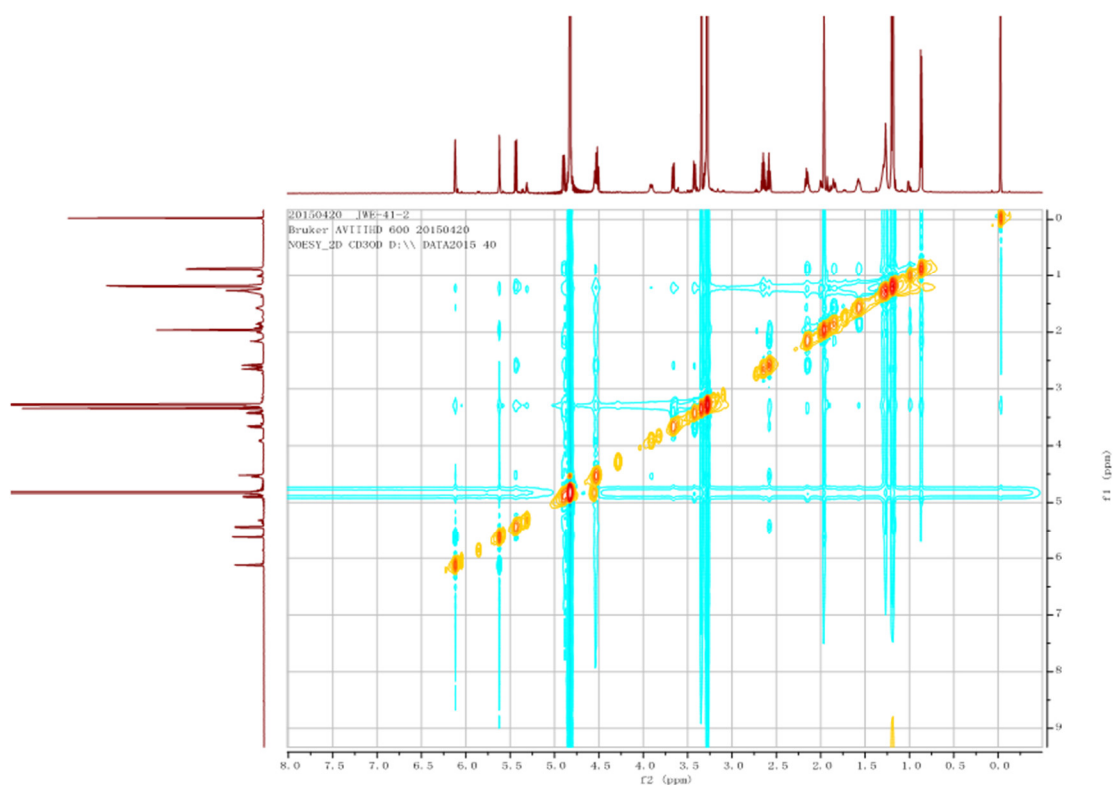

**Figure S4.6** NOESY spectrum of compound **4** in CD<sub>3</sub>OD.

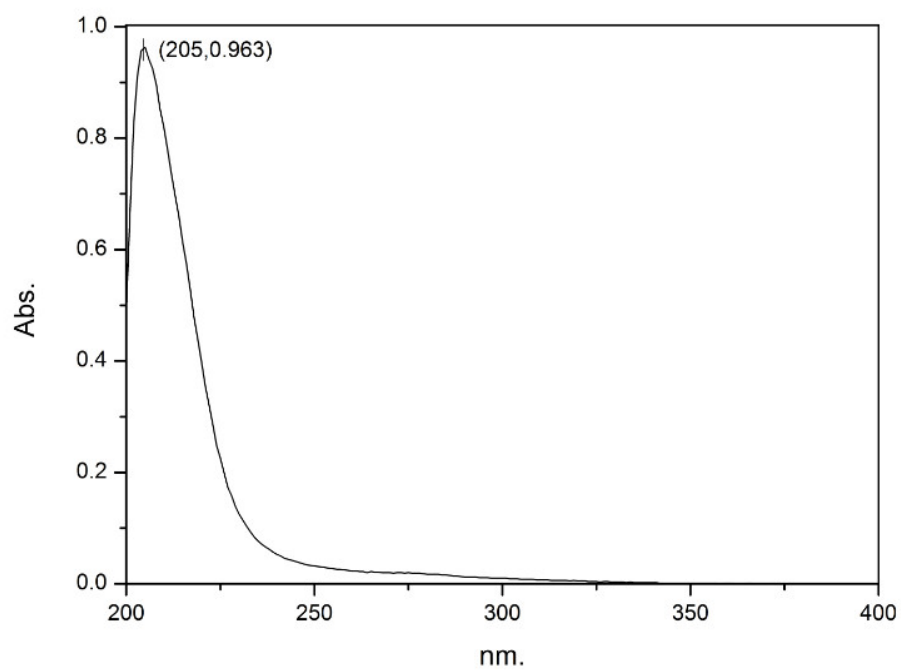

**Figure S4.7** UV spectrum of compound **4**.



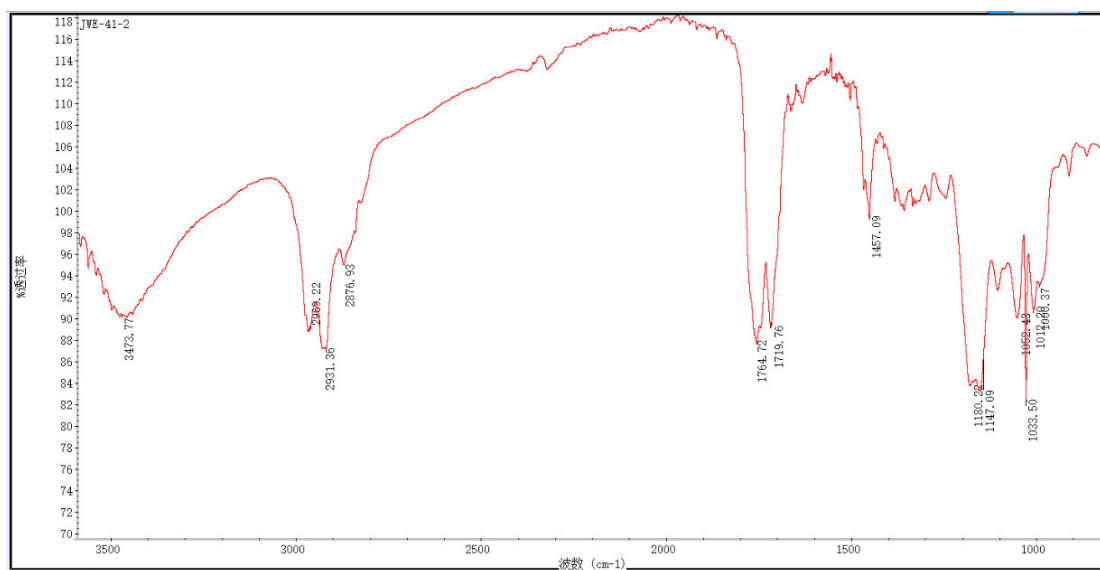

**Figure S4.8** IR spectrum of compound **4**.

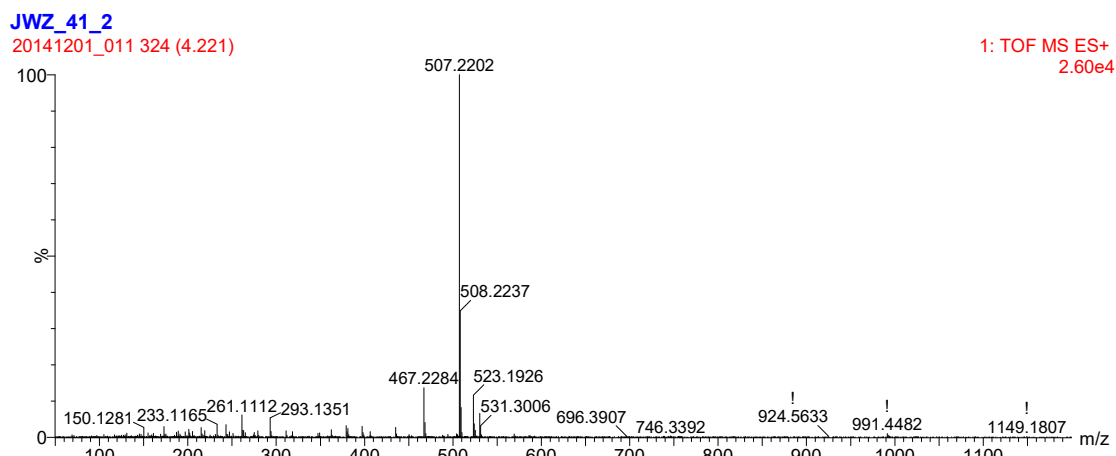

**Figure S4.9** HRESIMS spectrum of compound **4**.

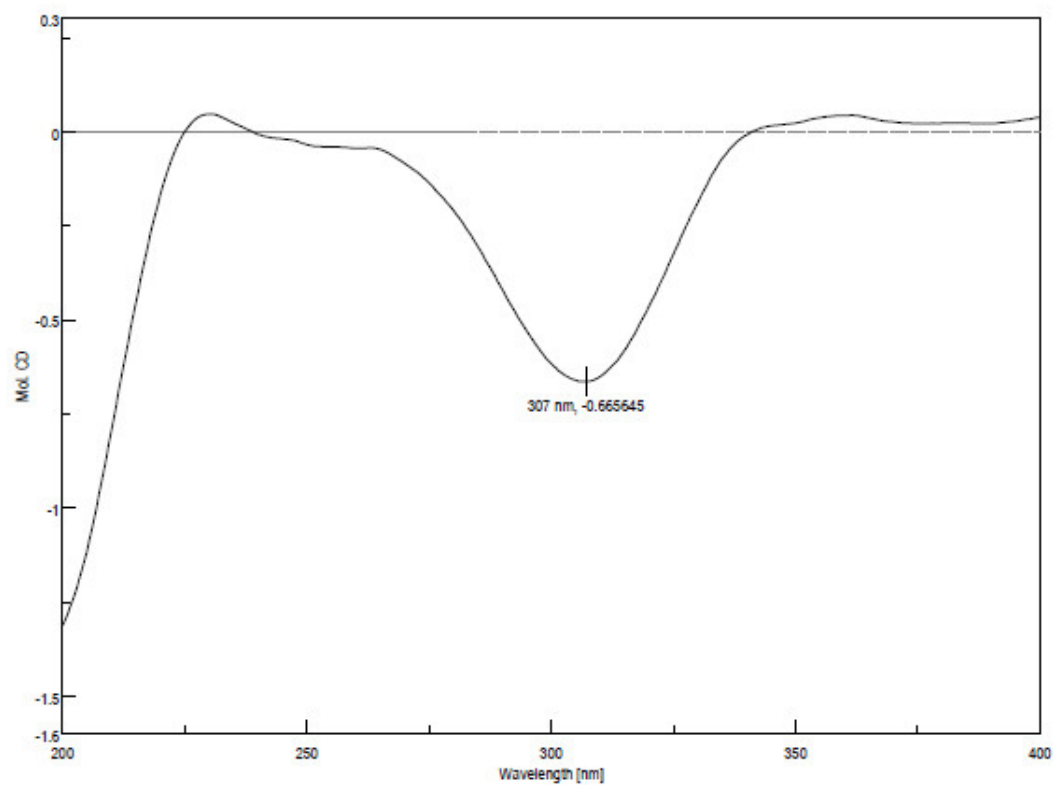

**Figure S4.10** ECD spectrum of compound **4**.

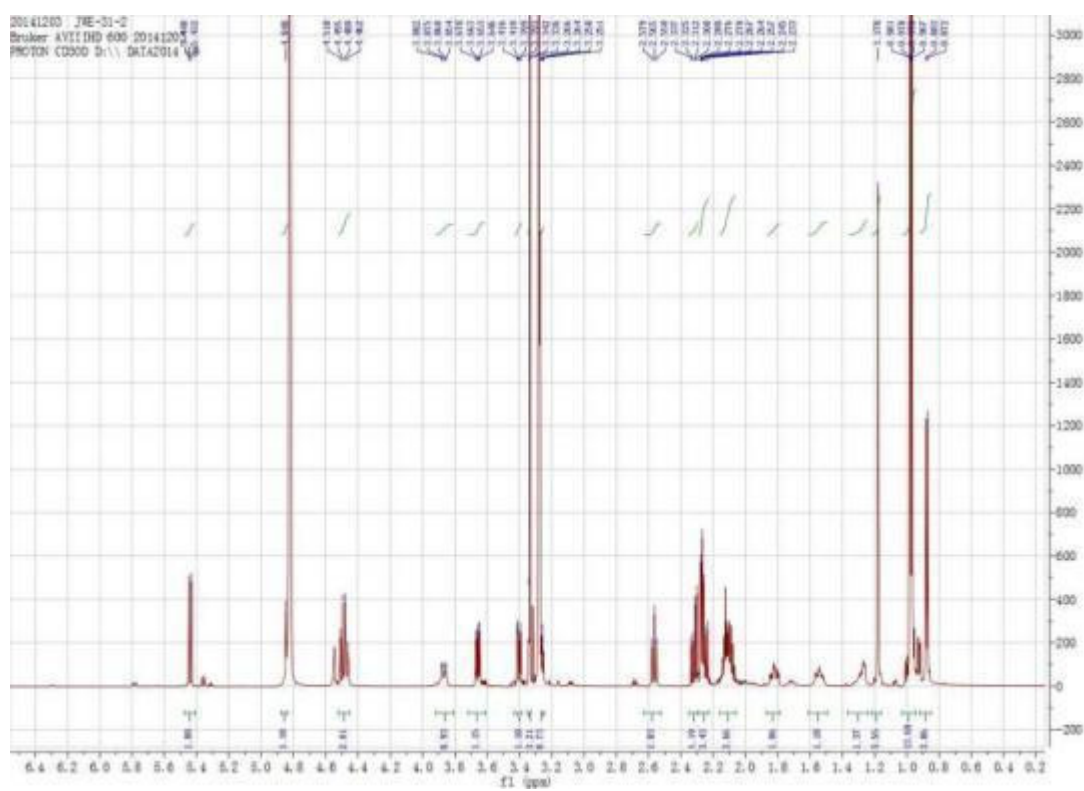

**Figure S5.1** <sup>1</sup>H NMR spectrum of compound **5** in CD<sub>3</sub>OD.

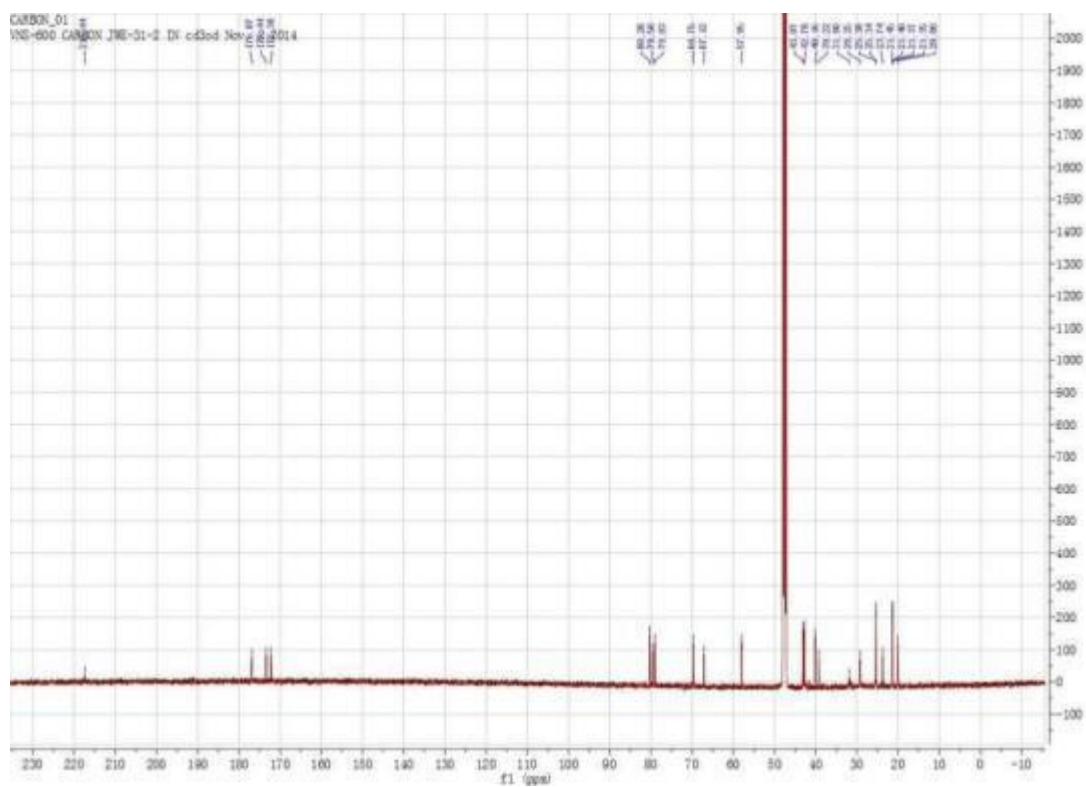

**Figure S5.2**  $^{13}\text{C}$  NMR spectrum of compound **5** in  $\text{CD}_3\text{OD}$ .

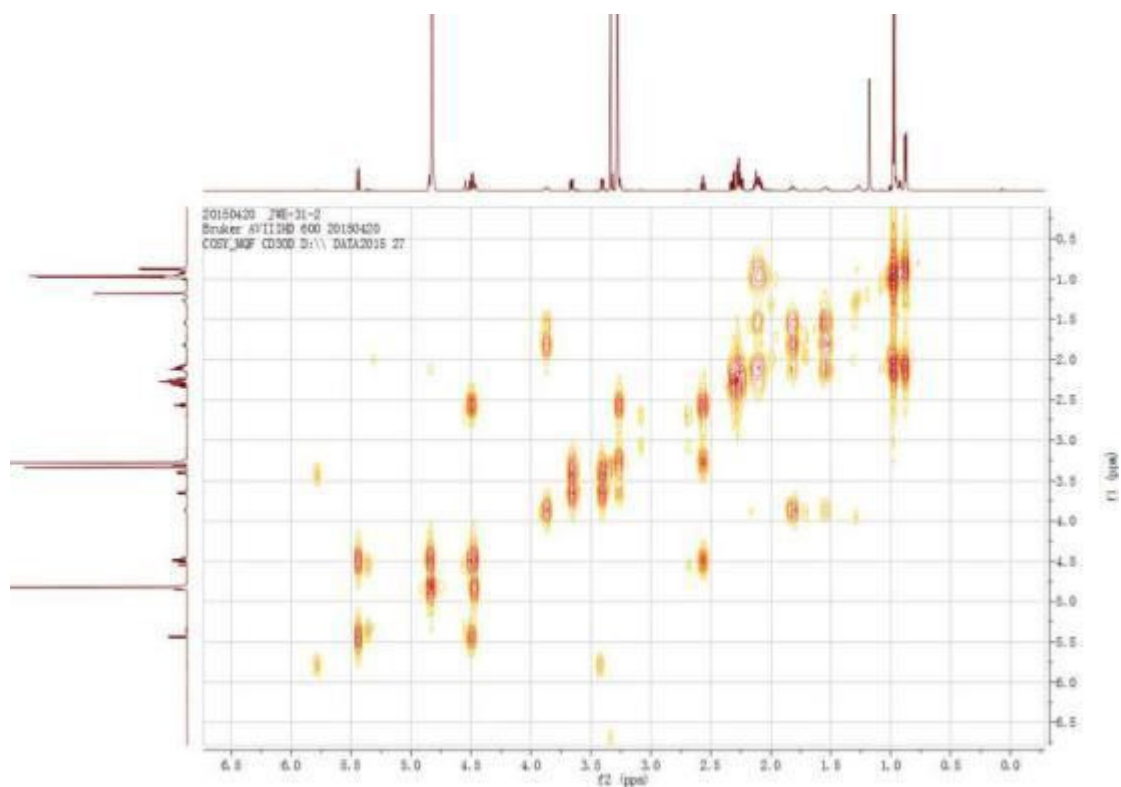

**Figure S5.3**  $^1\text{H}$ - $^1\text{H}$  COSY spectrum of compound **5** in  $\text{CD}_3\text{OD}$ .

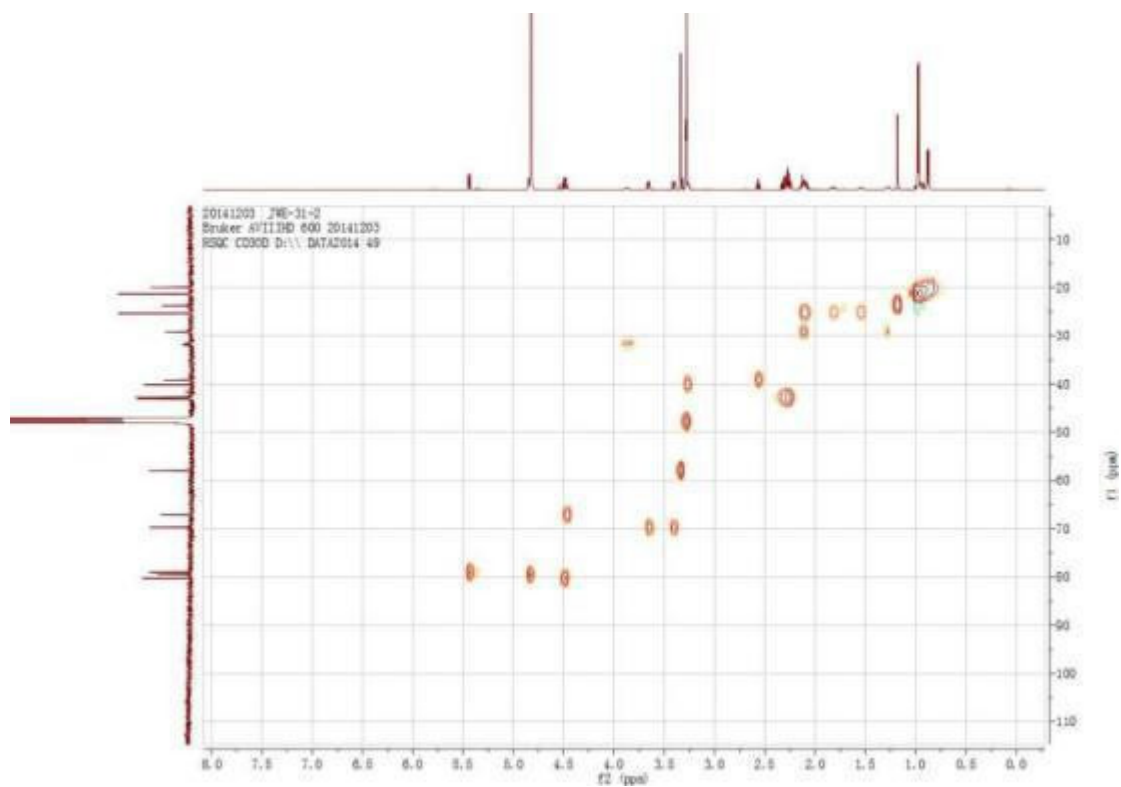

**Figure S5.4** HSQC spectrum of compound **5** in CD<sub>3</sub>OD.

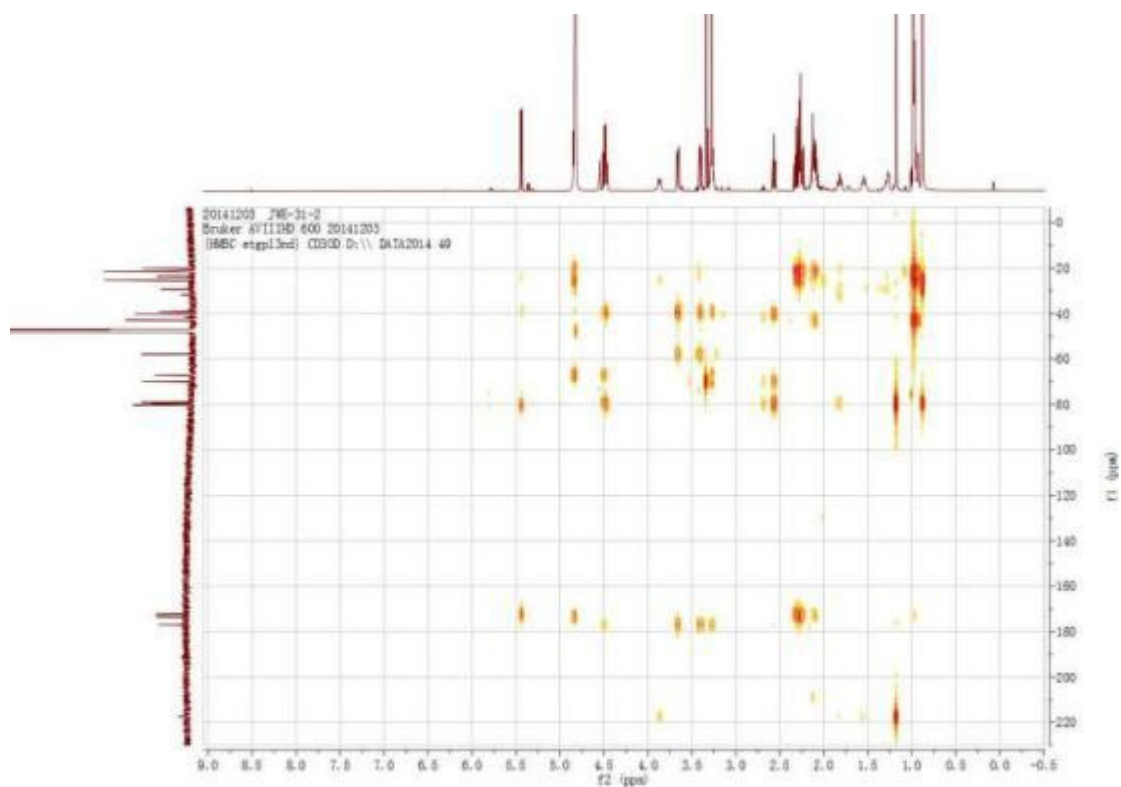

**Figure S5.5** HMBC spectrum of compound **5** in CD<sub>3</sub>OD.

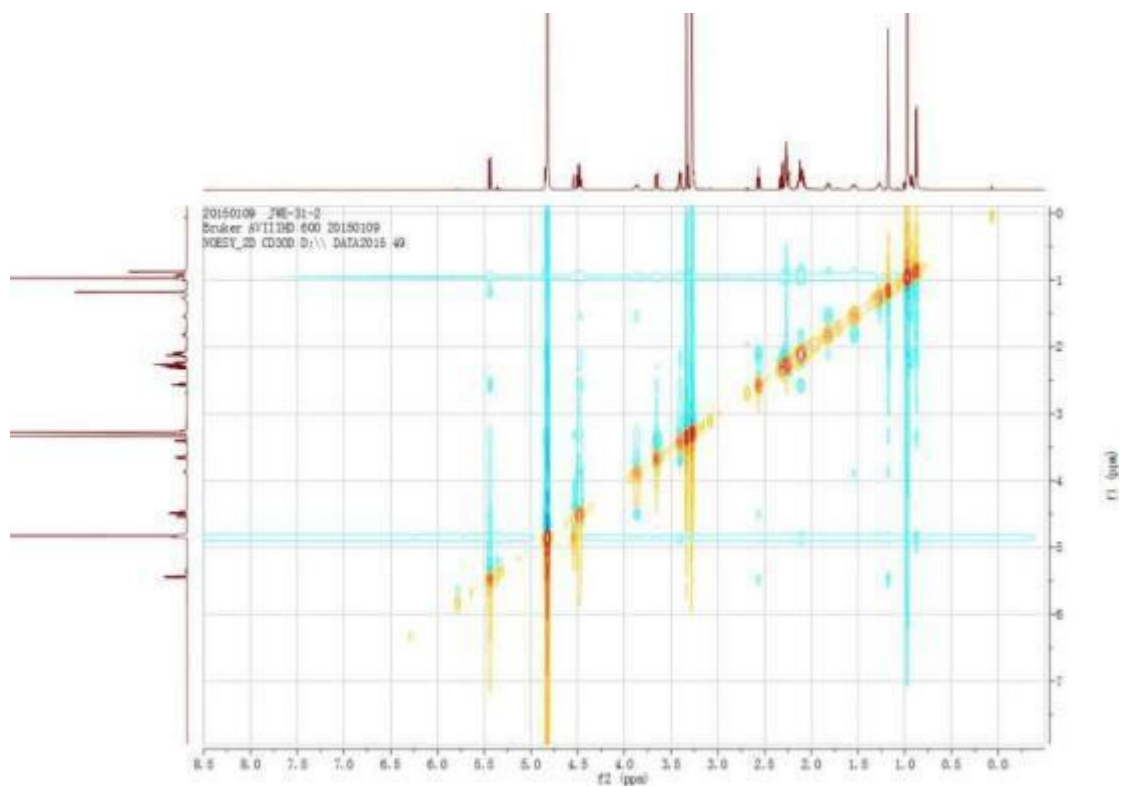

**Figure S5.6** NOESY spectrum of compound **5** in CD<sub>3</sub>OD.

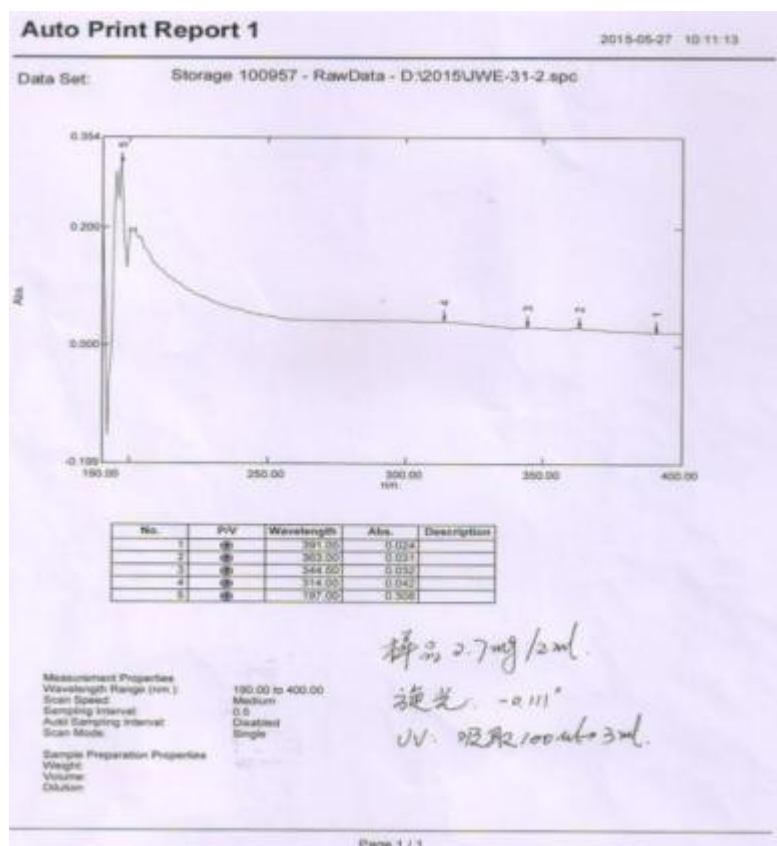

**Figure S5.7** UV spectrum of compound **5**.

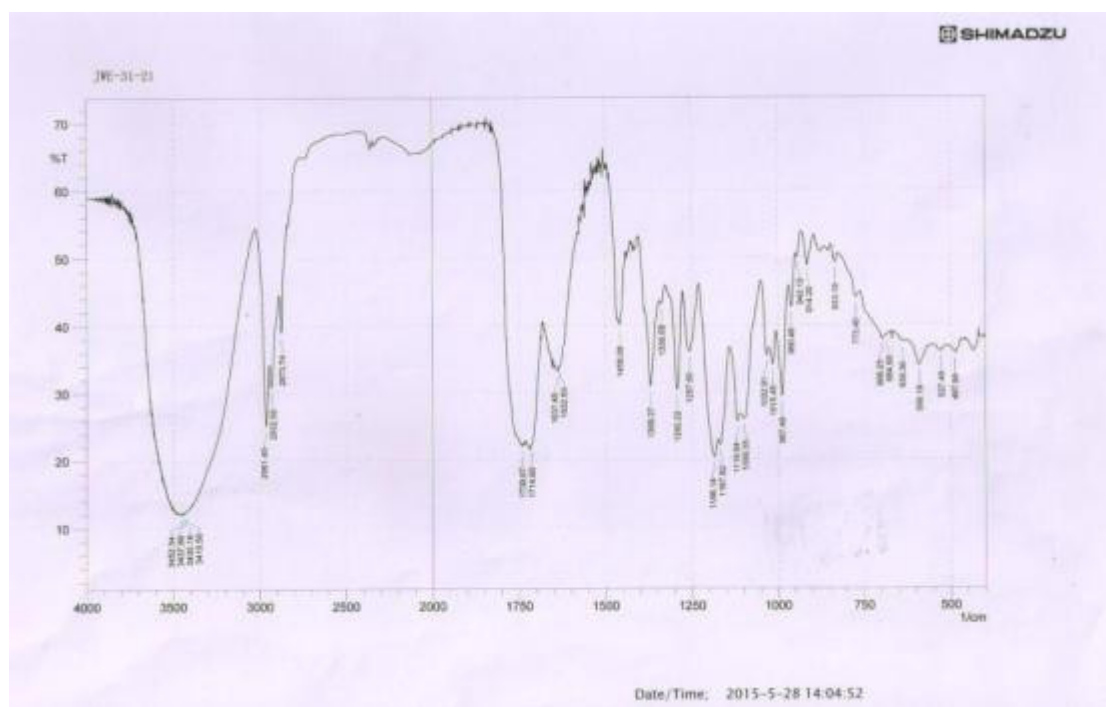

**Figure S5.8** IR spectrum of compound **5**.

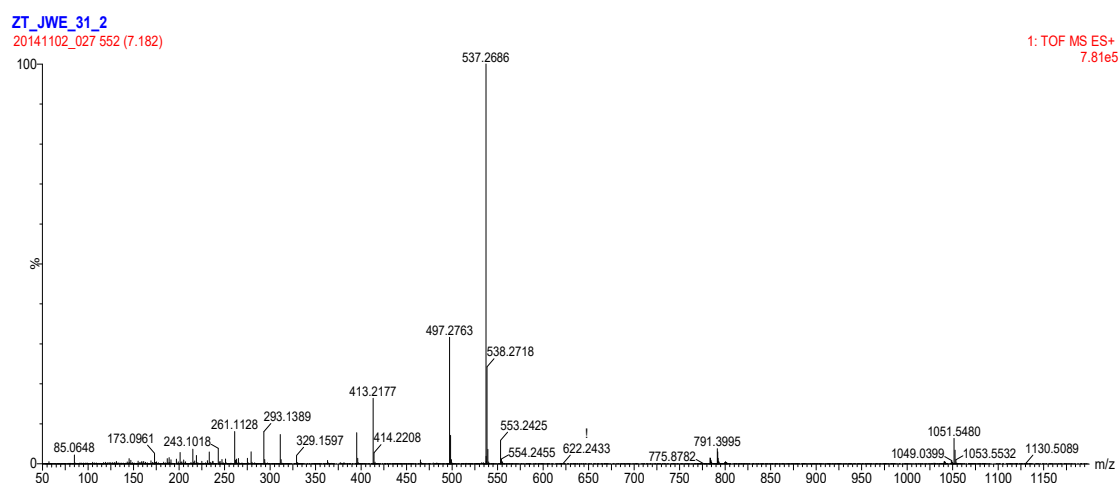

**Figure S5.9** HRESIMS spectrum of compound **5**.

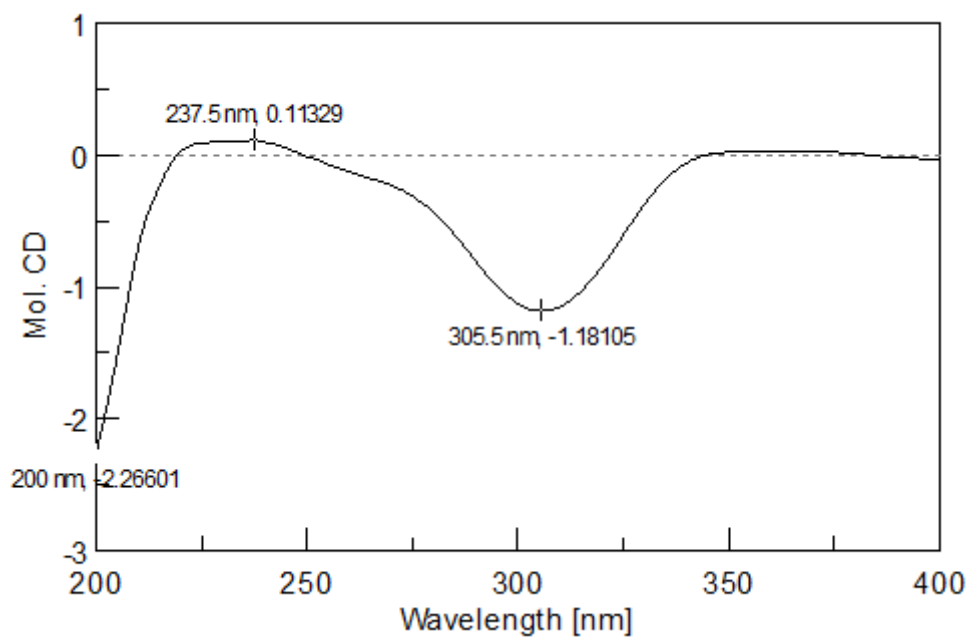

**Figure S5.10** ECD spectrum of compound **5**.

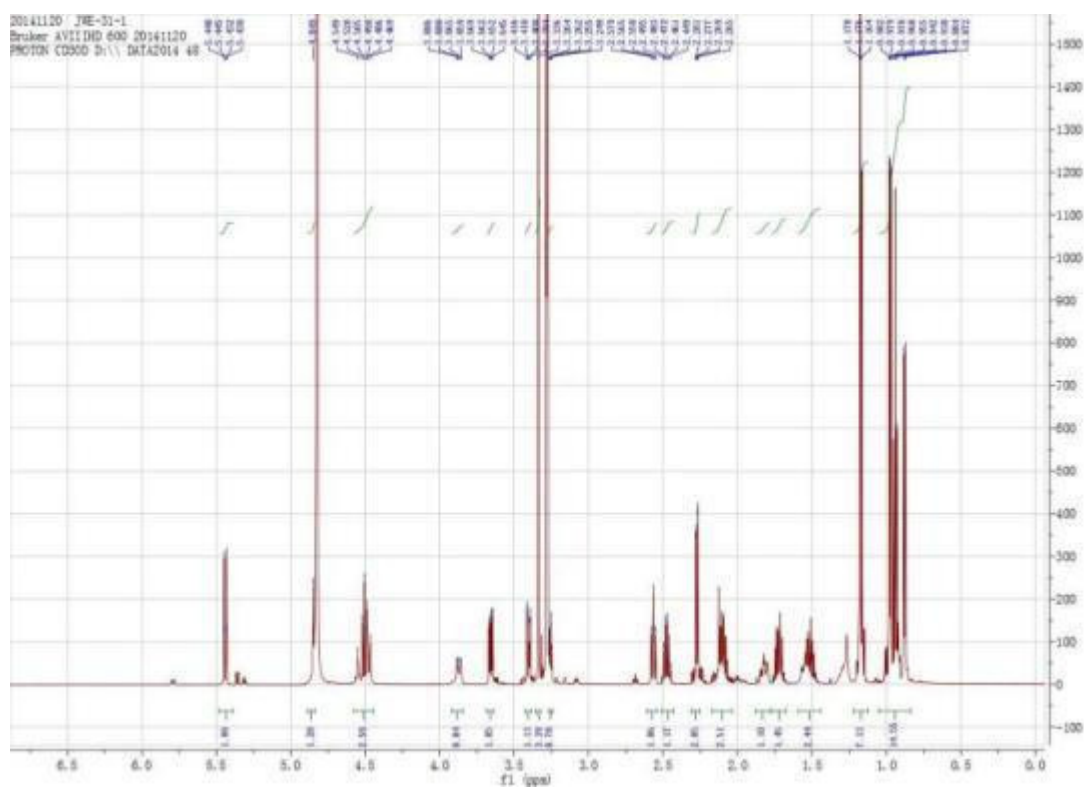

**Figure S6.1** <sup>1</sup>H NMR spectrum of compound **6** in CD<sub>3</sub>OD.

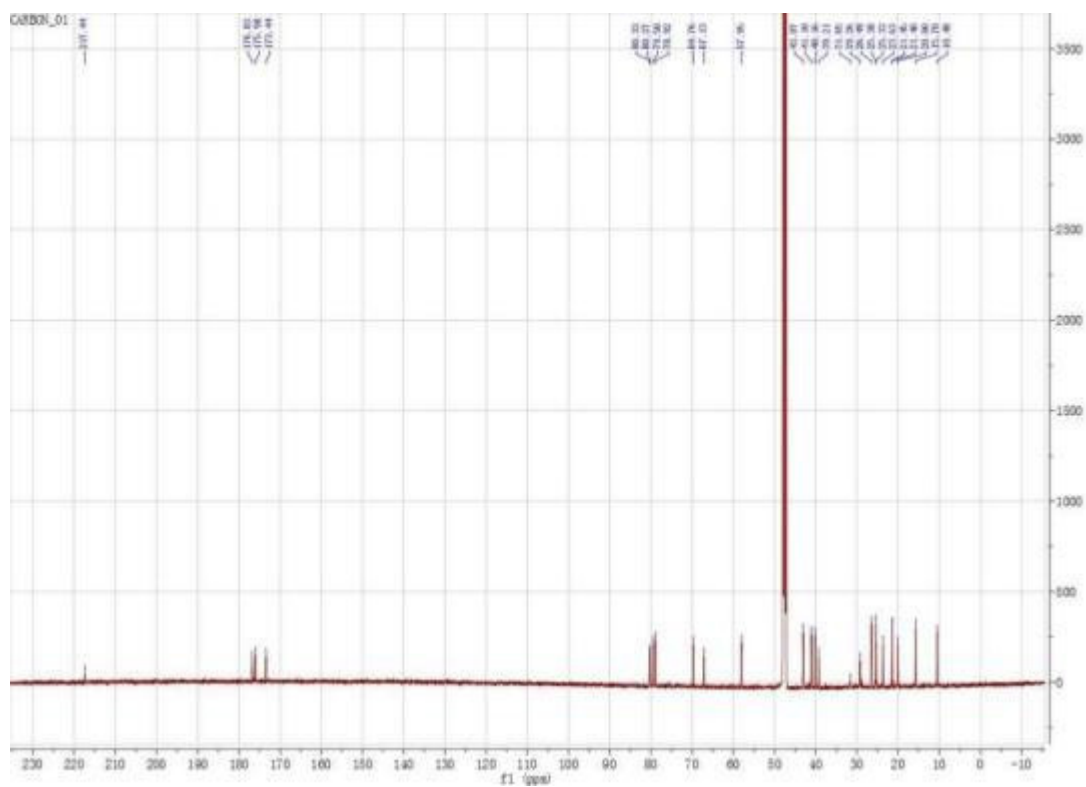

**Figure S6.2**  $^{13}\text{C}$  NMR spectrum of compound **6** in  $\text{CD}_3\text{OD}$ .

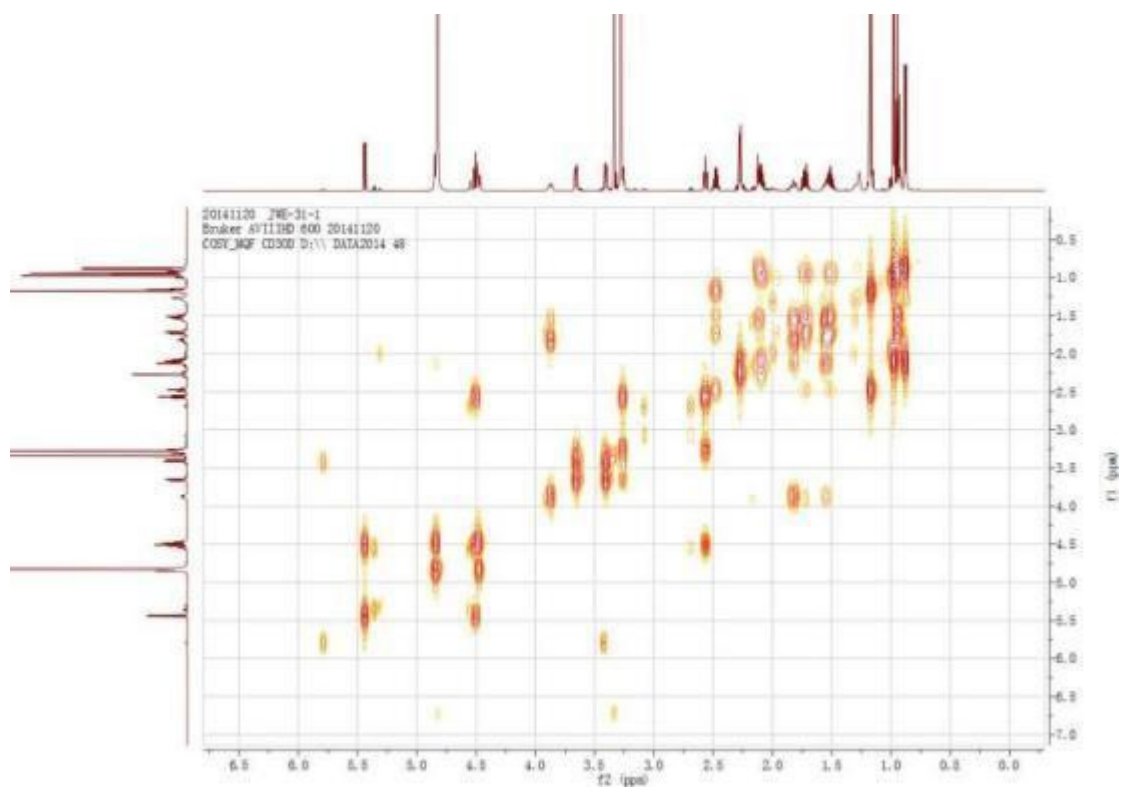

**Figure S6.3**  $^1\text{H}$ - $^1\text{H}$  COSY spectrum of compound **6** in  $\text{CD}_3\text{OD}$ .



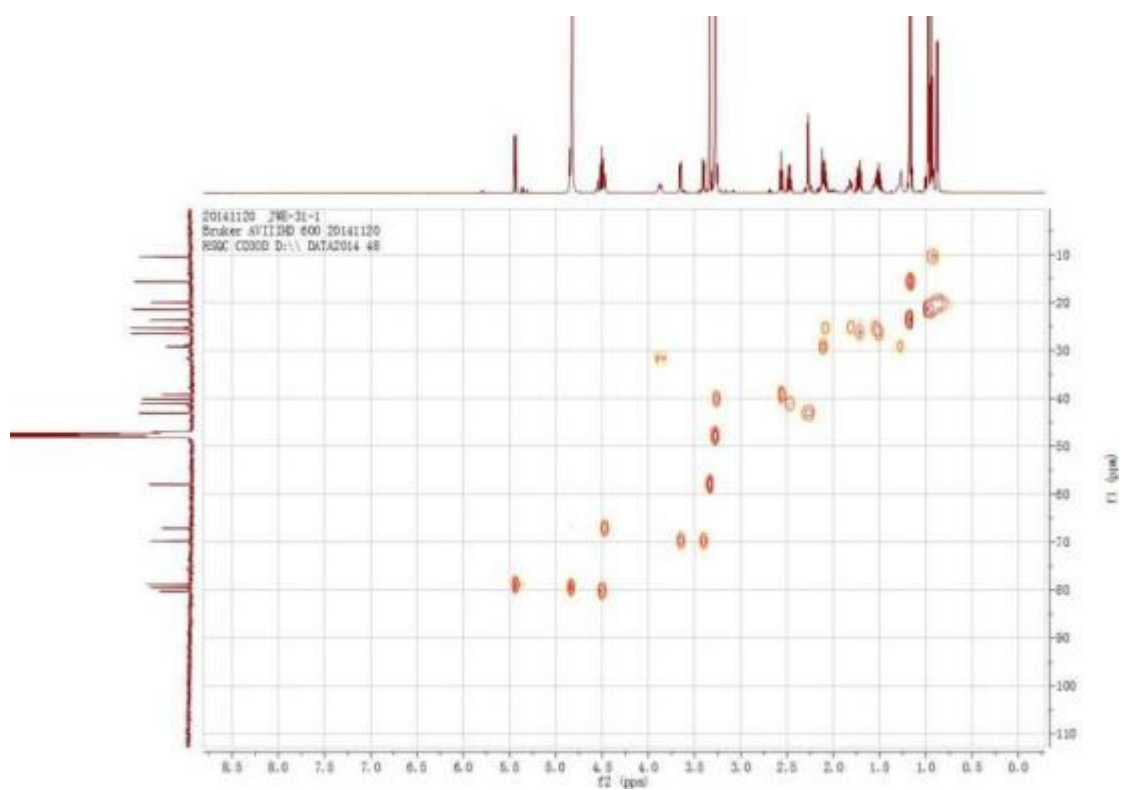

**Figure S6.4** HSQC spectrum of compound **6** in CD<sub>3</sub>OD.

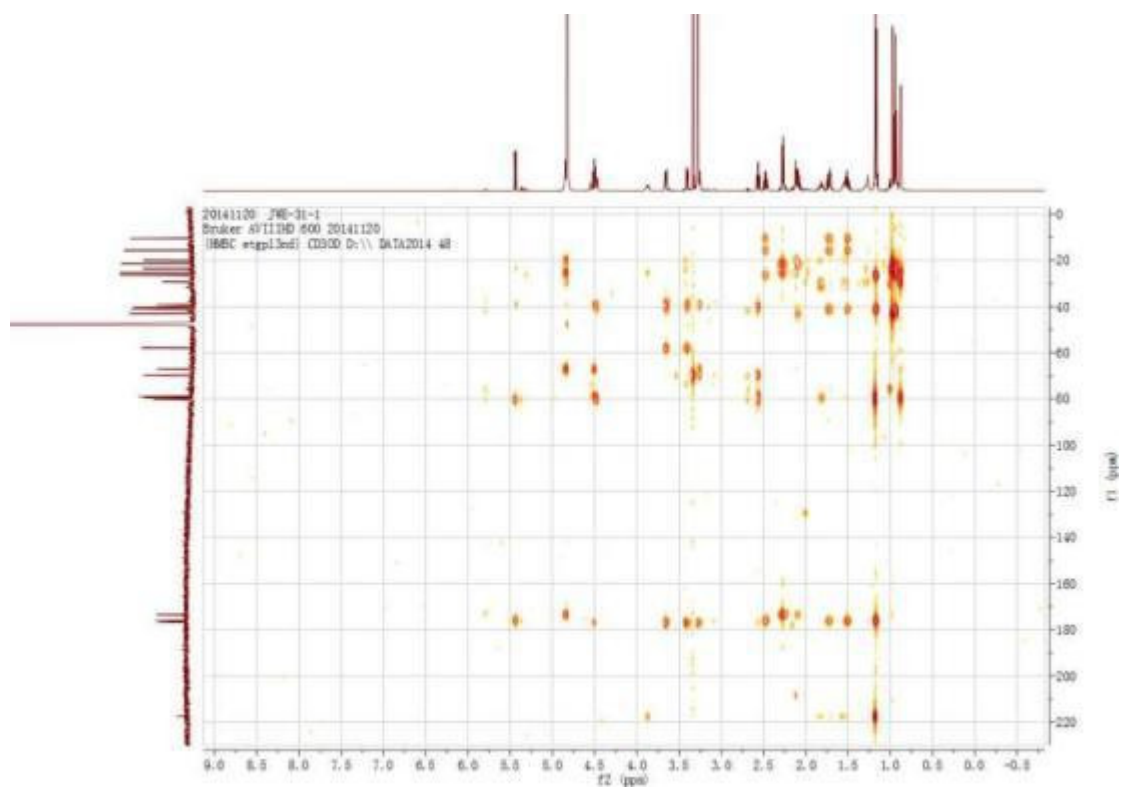

**Figure S6.5** HMBC spectrum of compound **6** in CD<sub>3</sub>OD.

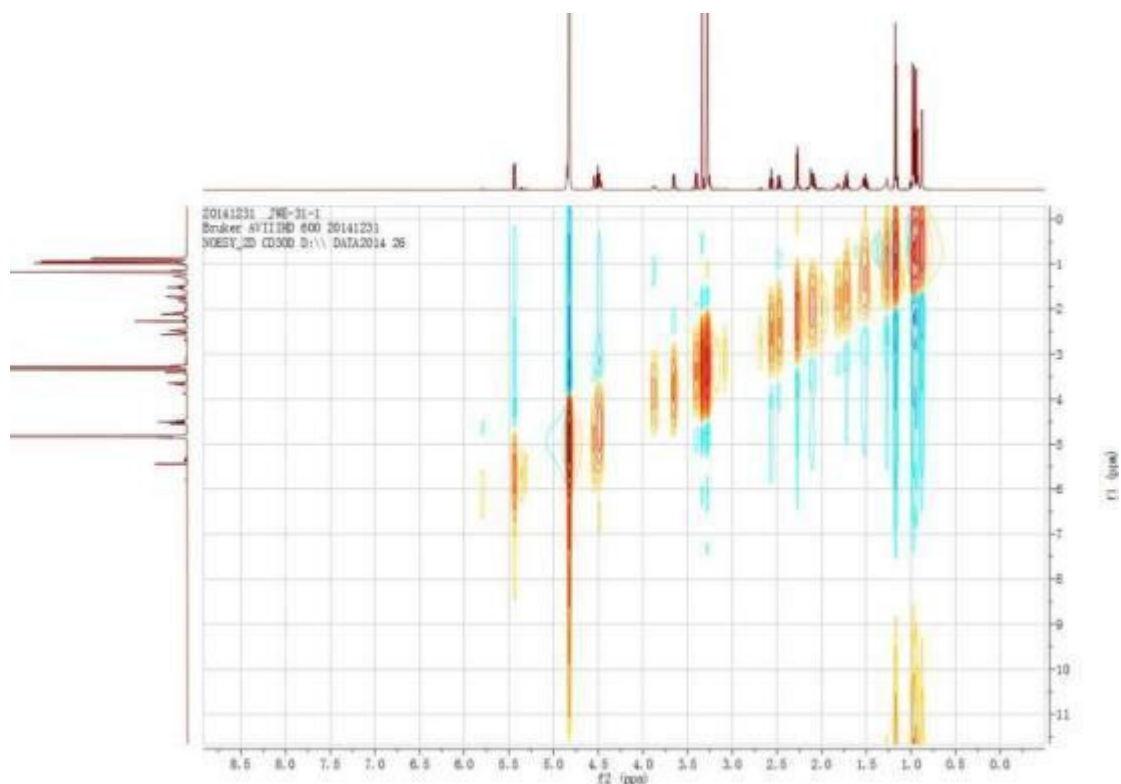

**Figure S6.6** NOESY spectrum of compound **6** in CD<sub>3</sub>OD.

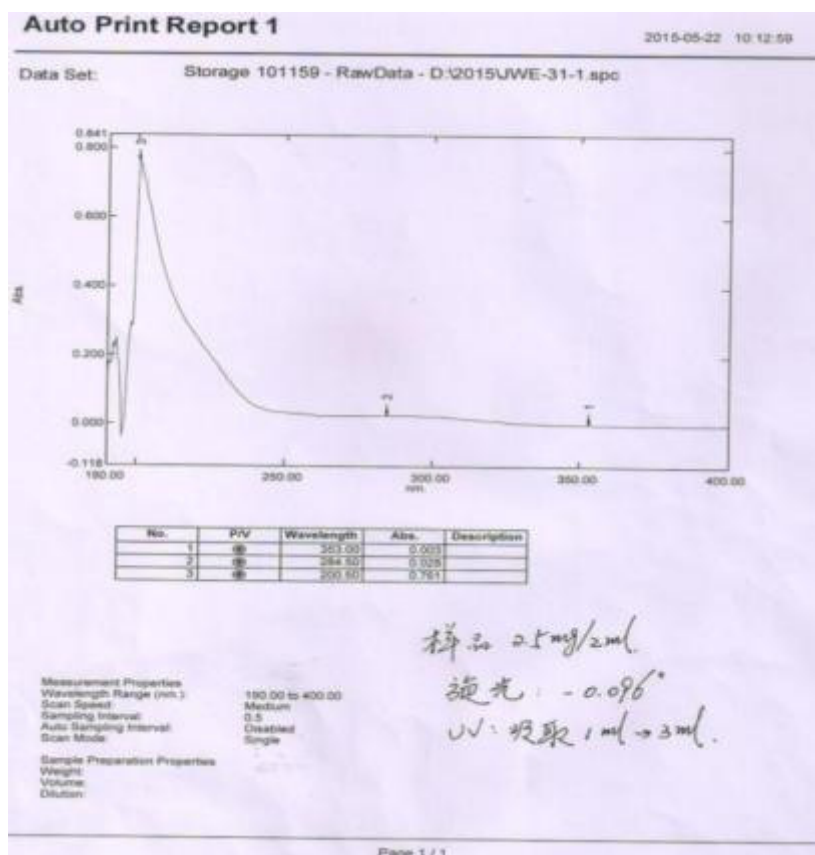

**Figure S6.7** UV spectrum of compound **6**.

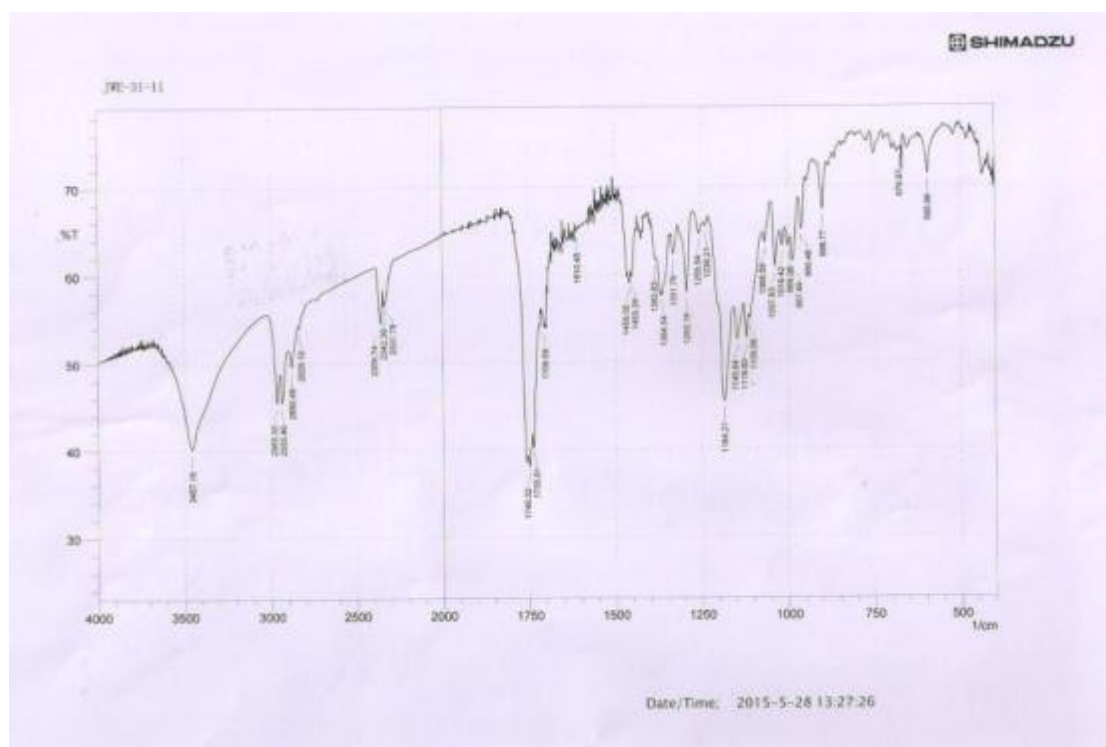

Figure S6.8 IR spectrum of compound 6.

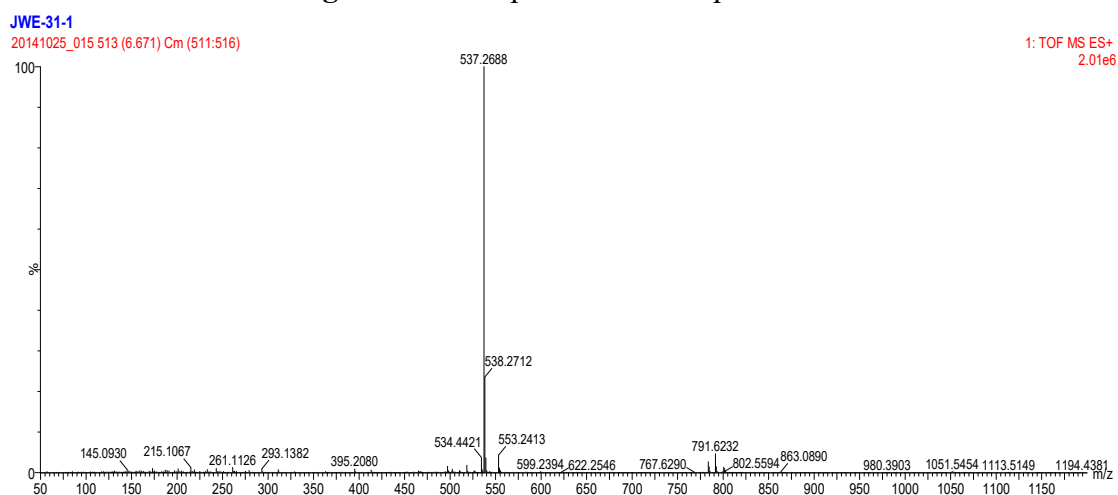

Figure S6.9 HRESIMS spectrum of compound 6.

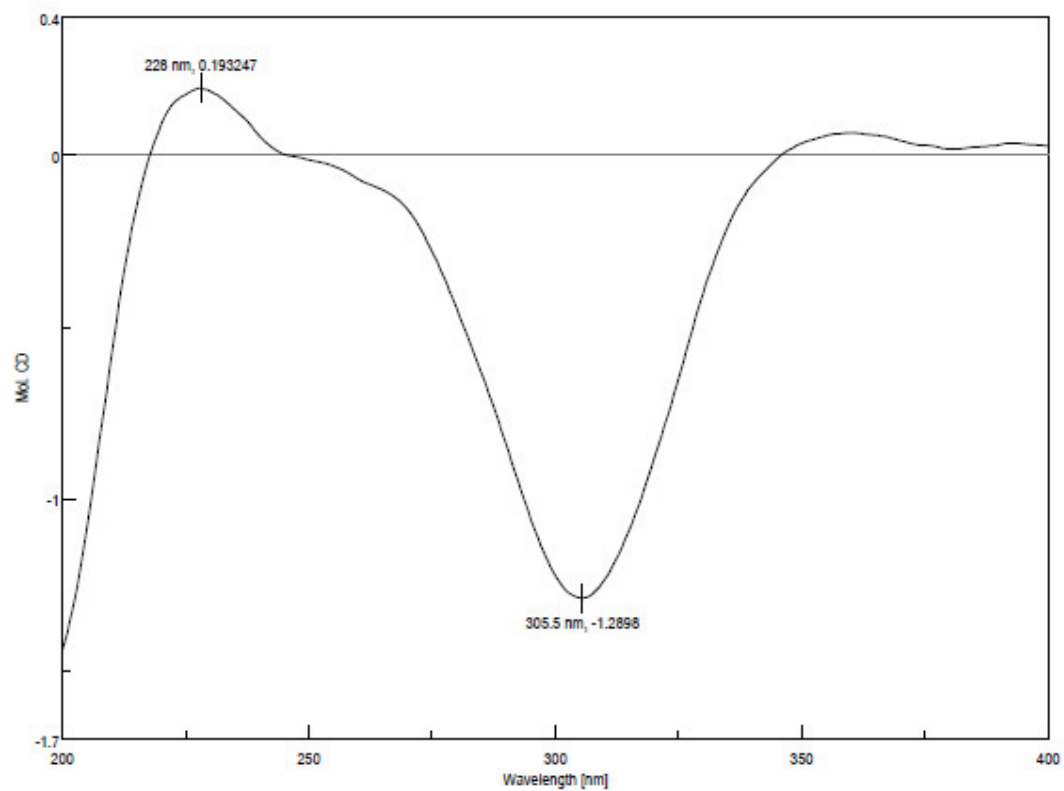

Figure S6.10 ECD spectrum of compound 6.

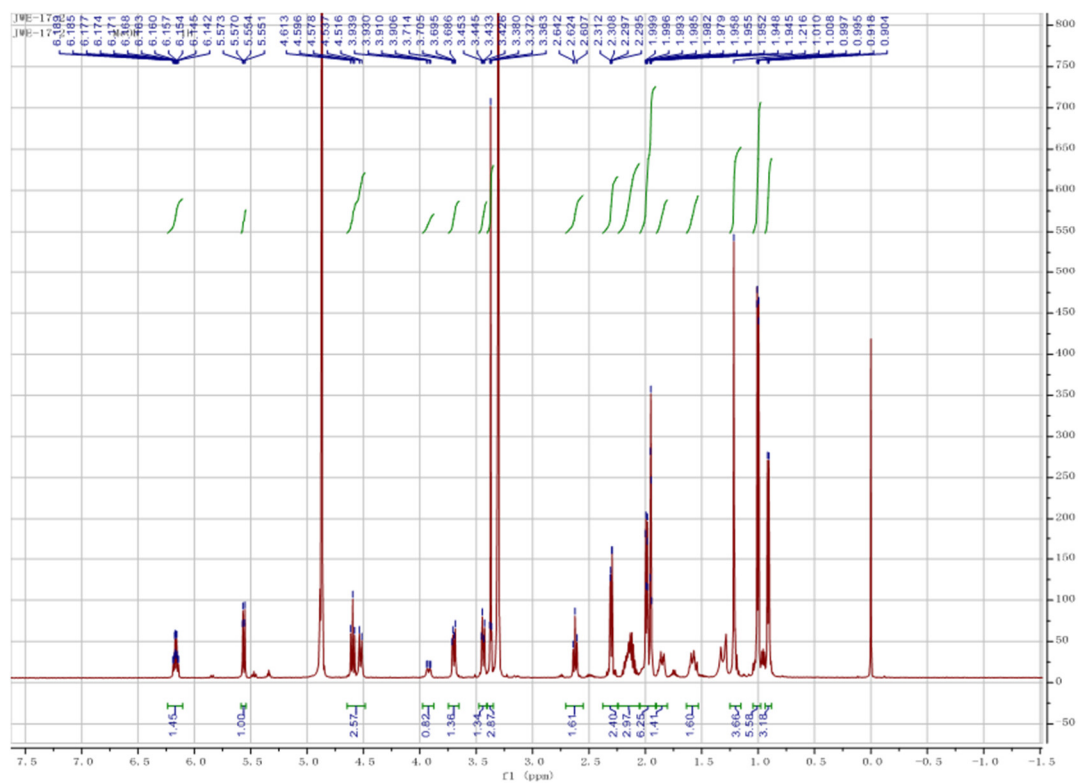

Figure S7.1  $^1\text{H}$  NMR spectrum of compound 7 in  $\text{CD}_3\text{OD}$ .

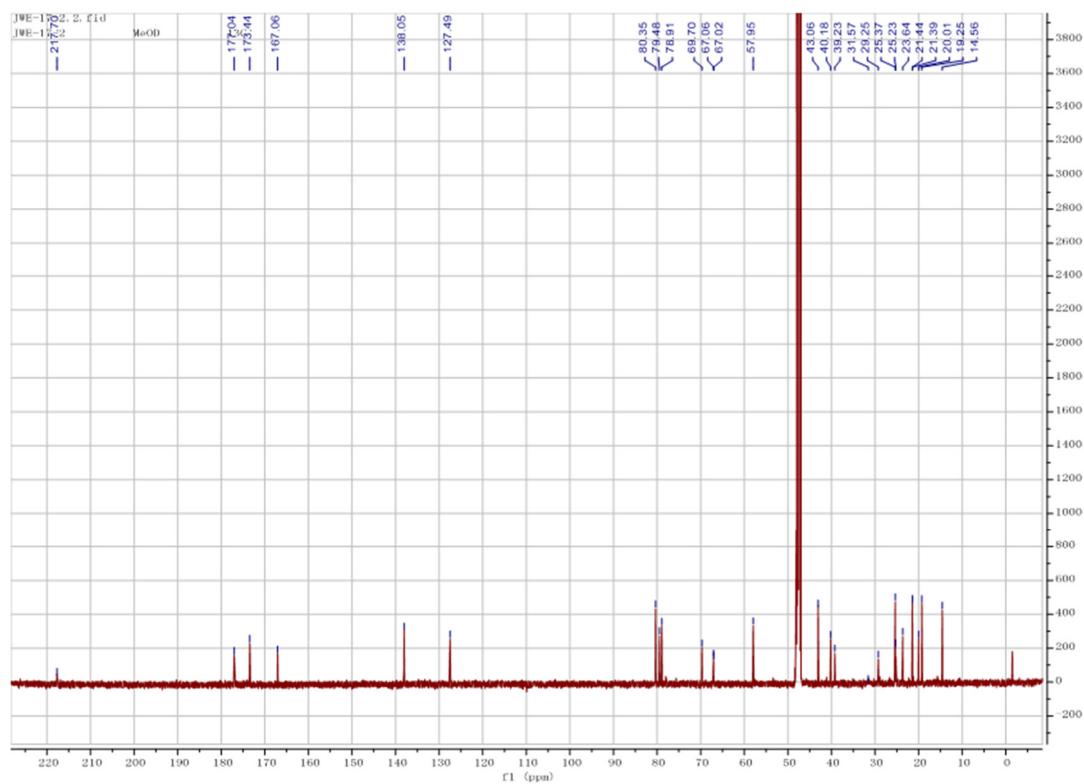

**Figure S7.2**  $^{13}\text{C}$  NMR spectrum of compound **7** in CD<sub>3</sub>OD.

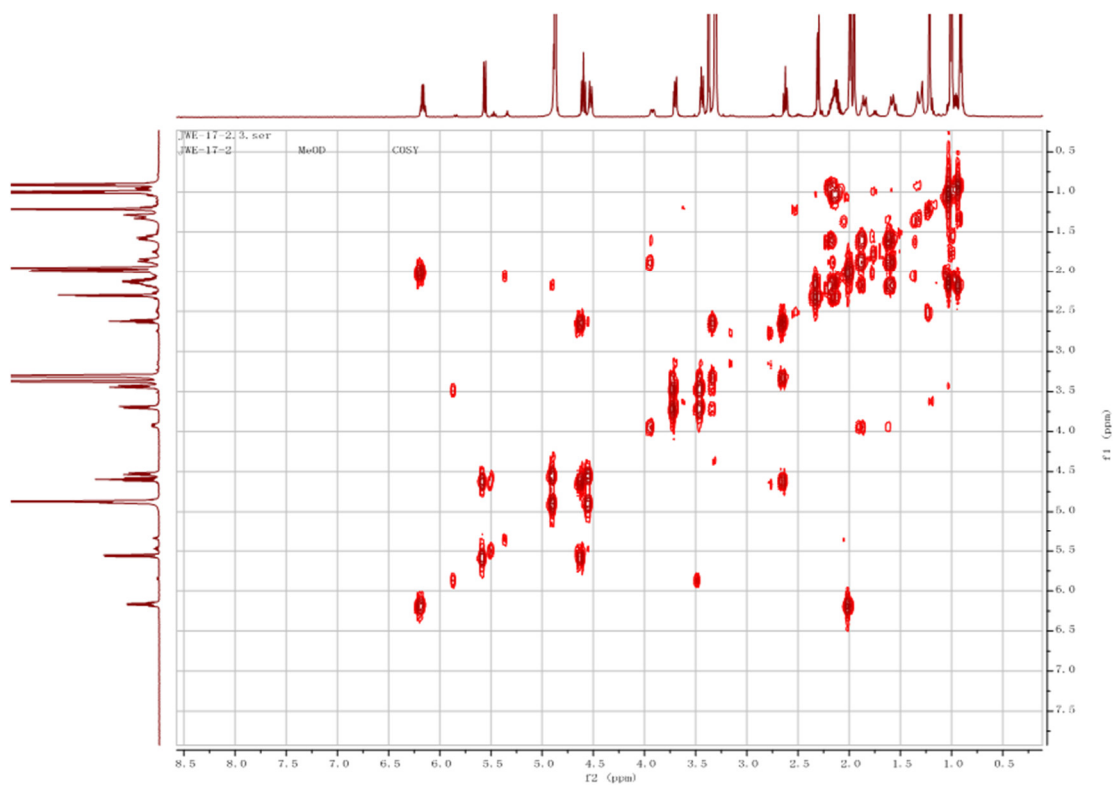

**Figure S7.3**  $^1\text{H}$ - $^1\text{H}$  COSY spectrum (500 MHz) of compound **7** in CD<sub>3</sub>OD.

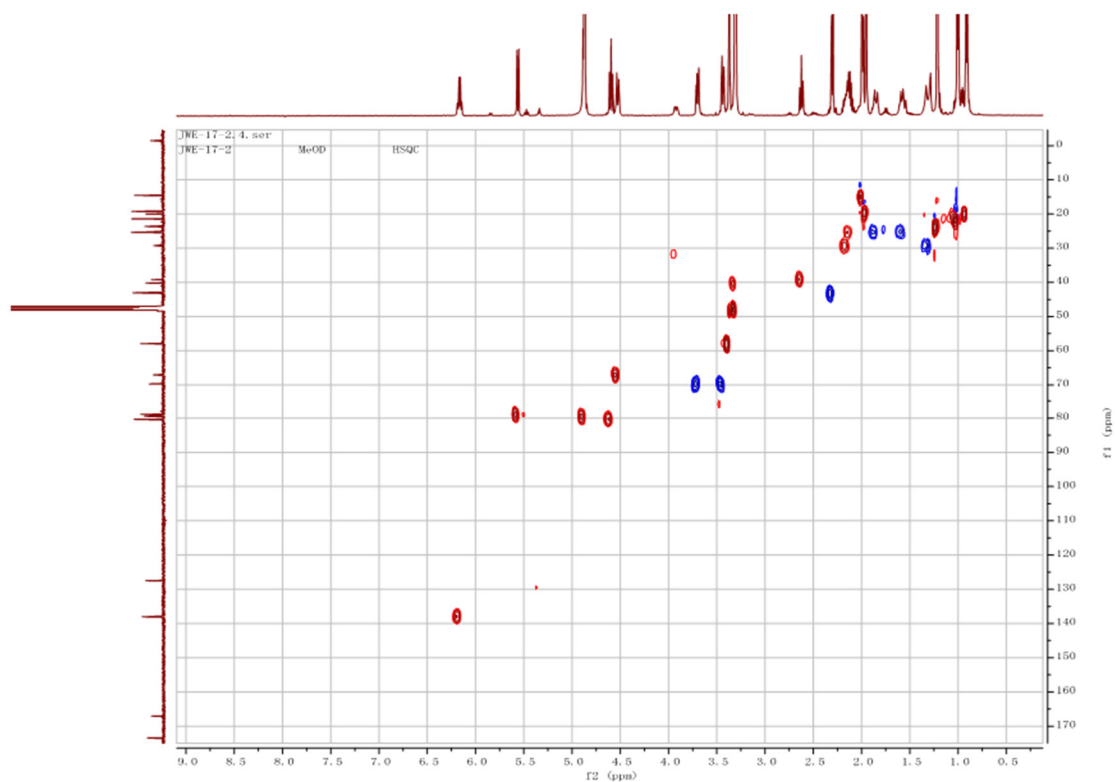

**Figure S7.4** HSQC spectrum of compound **7** in CD<sub>3</sub>OD.

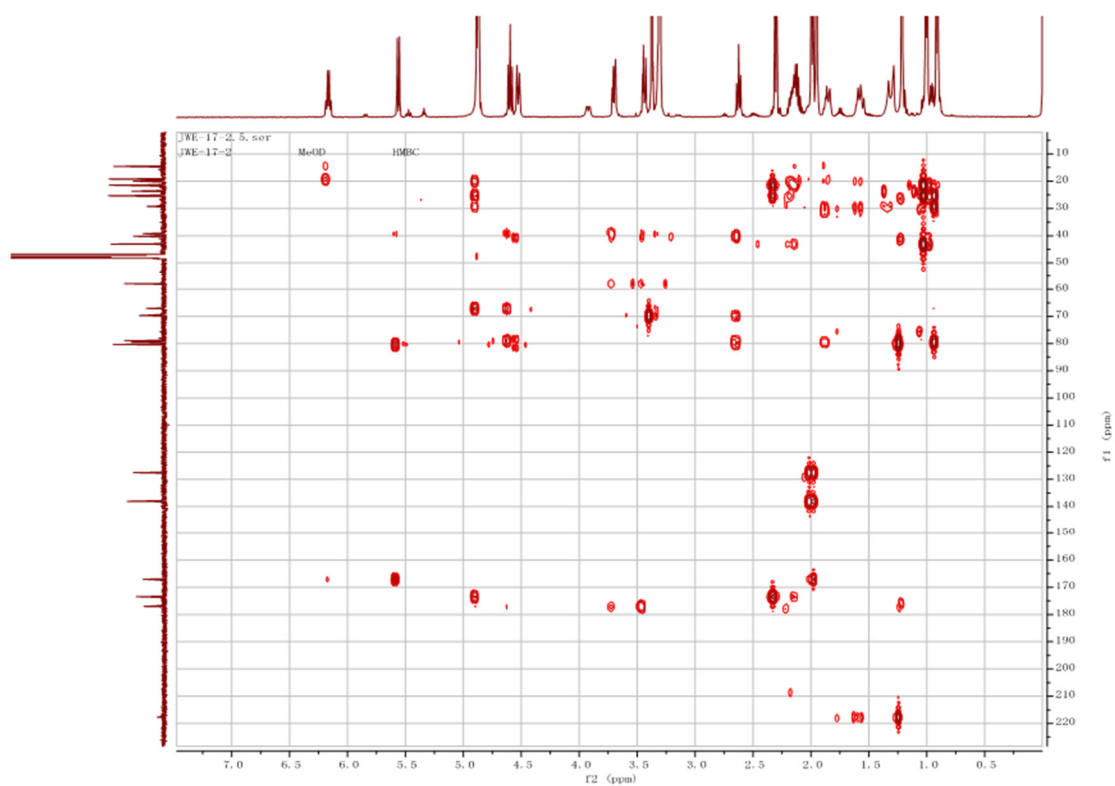

**Figure S7.5** HMBC spectrum of compound **7** in CD<sub>3</sub>OD.

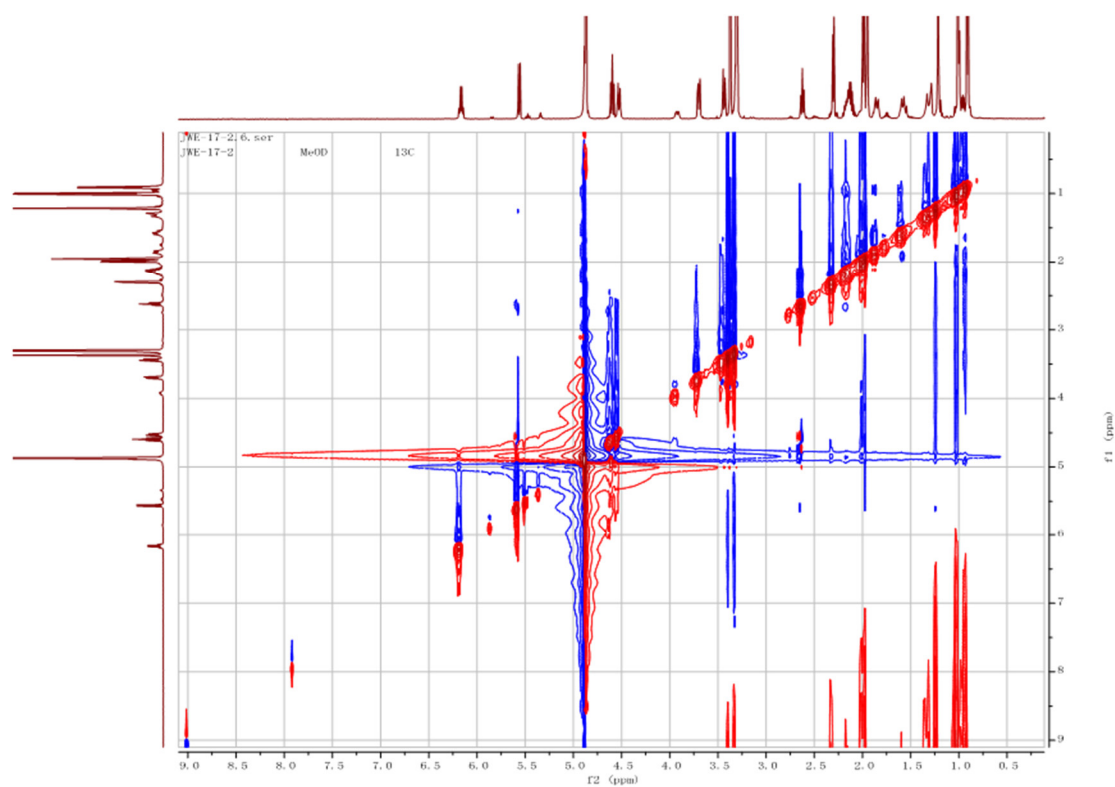

**Figure S7.6** ROESY spectrum of compound **7** in CD<sub>3</sub>OD.

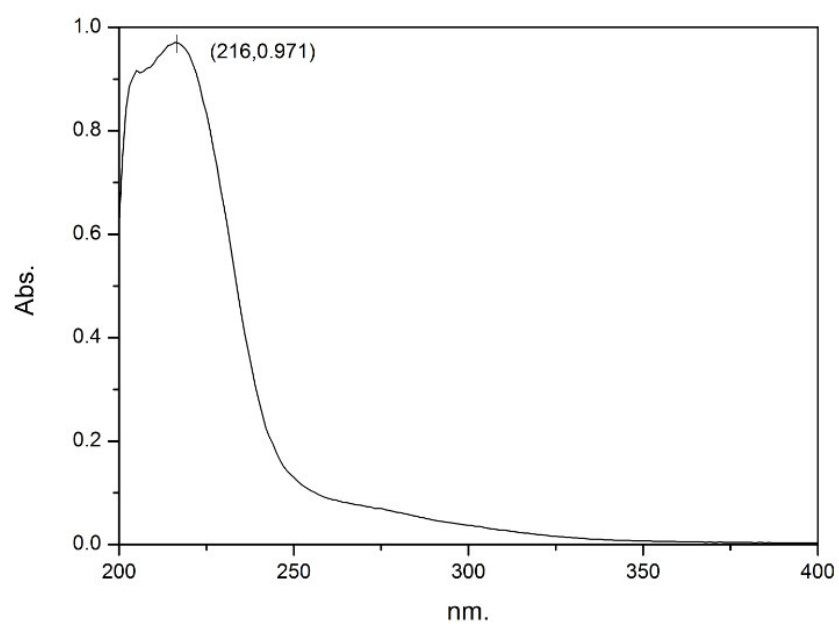

**Figure S7.7** UV spectrum of compound **7**.

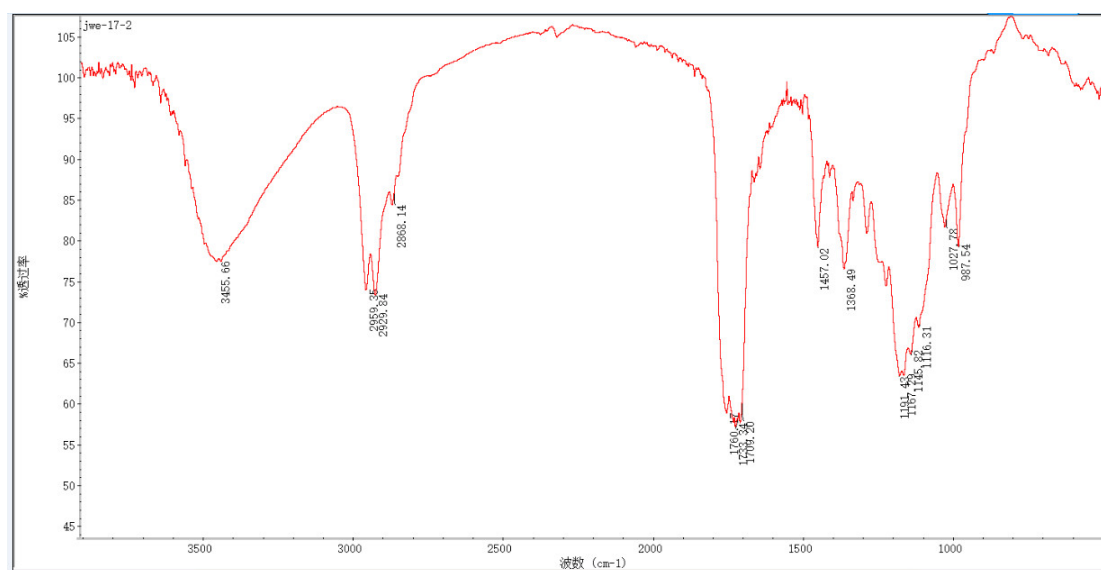

**Figure S7.8** IR spectrum of compound **7**.

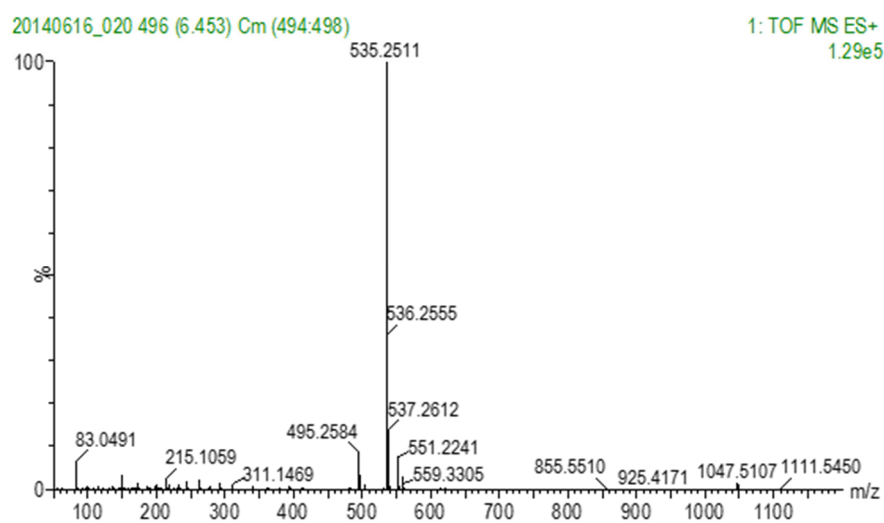

**Figure S7.9** HRESIMS spectrum of compound **7**.



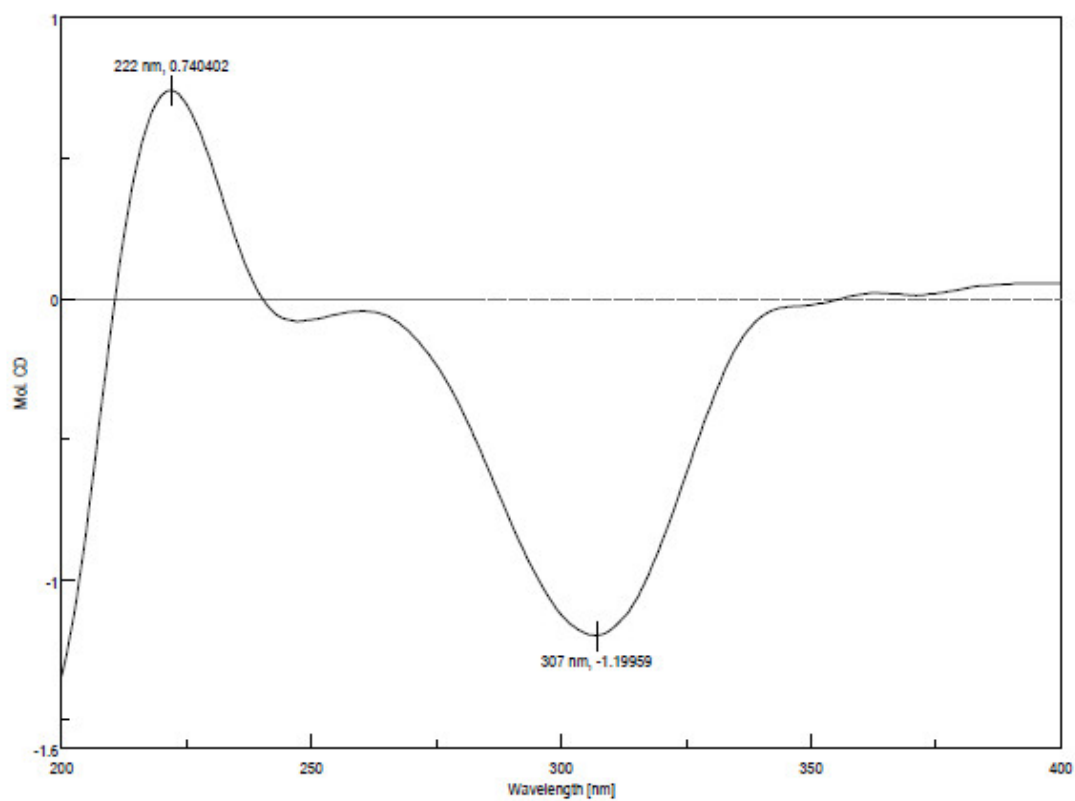

**Figure S7.10** ECD spectrum of compound 7.

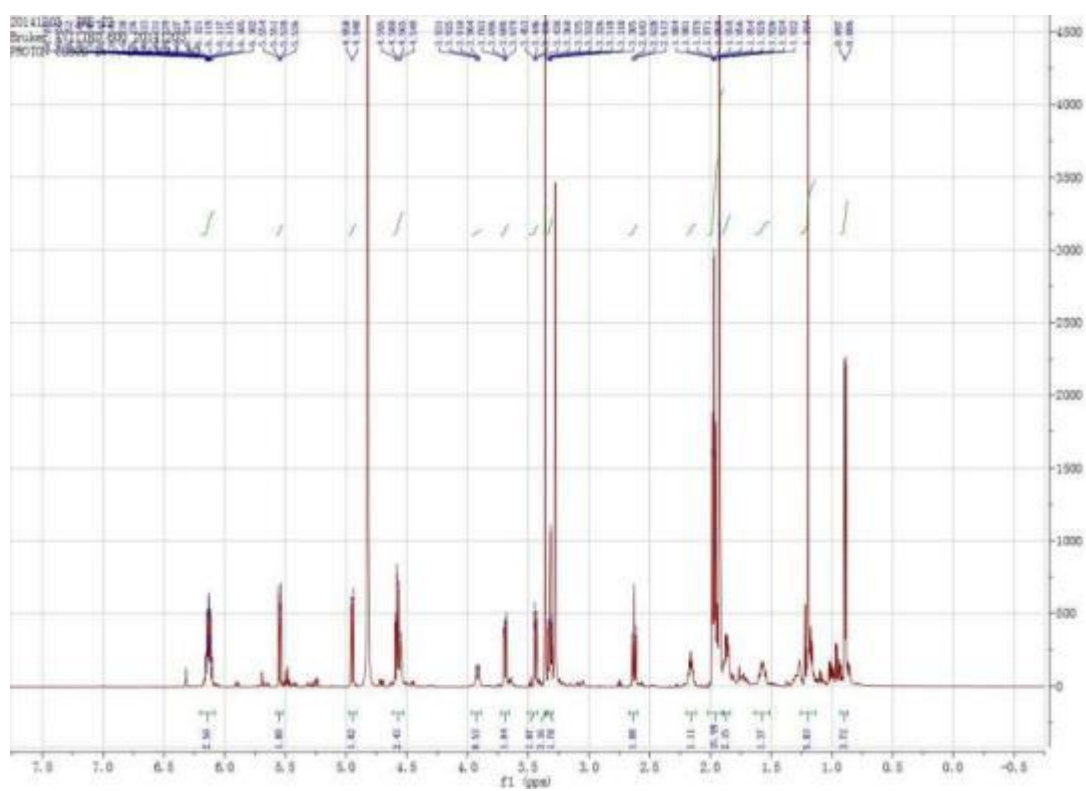

**Figure S8.1**  $^1\text{H}$  NMR spectrum of compound 8 in  $\text{CD}_3\text{OD}$ .

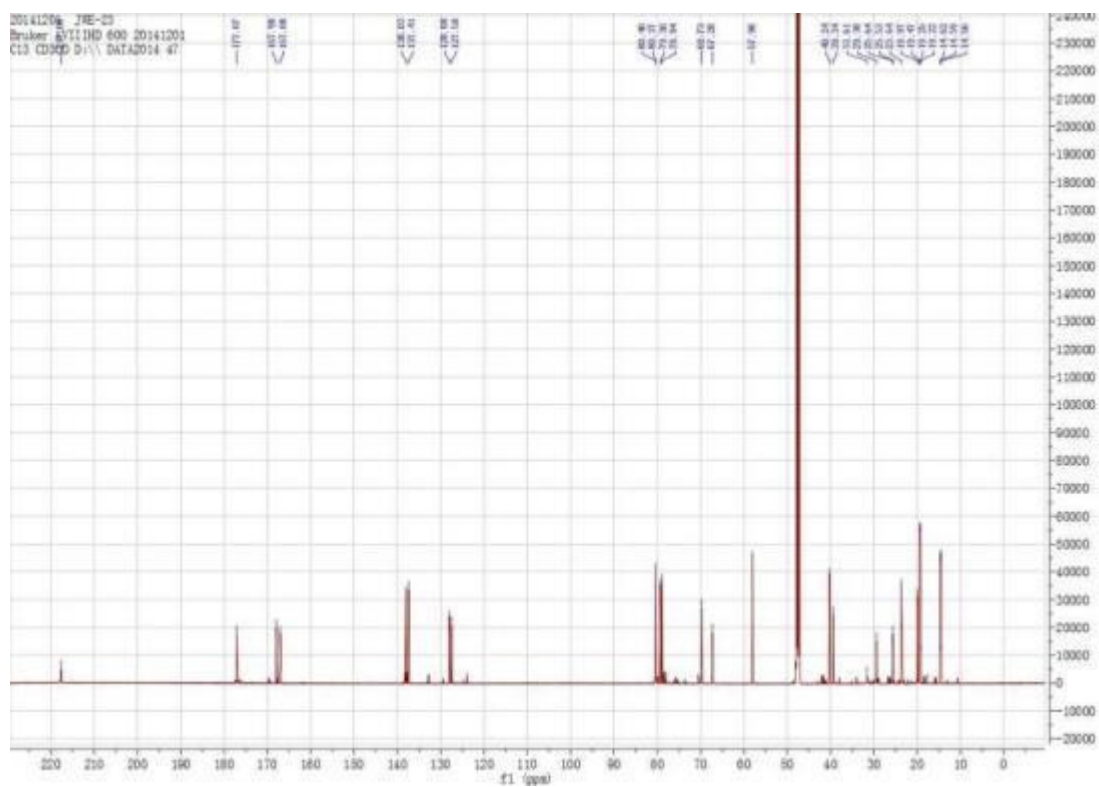

**Figure S8.2**  $^{13}\text{C}$  NMR spectrum of compound **8** in  $\text{CD}_3\text{OD}$ .

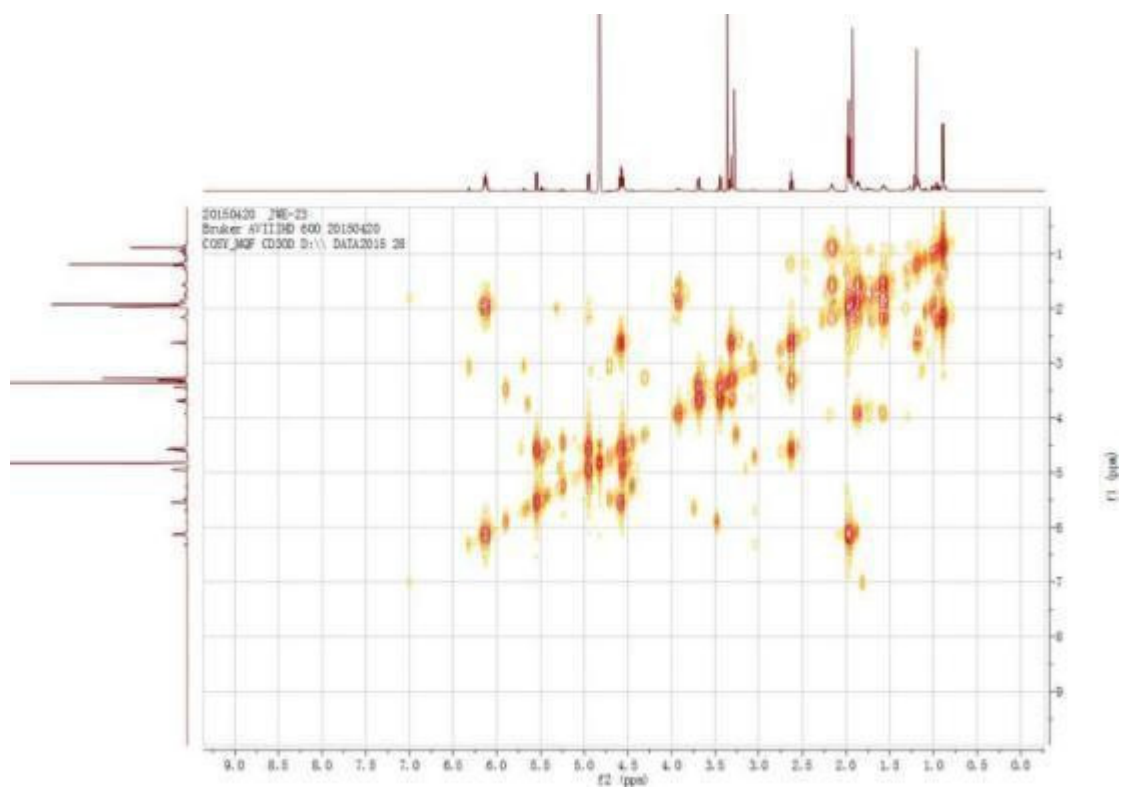

**Figure S8.3**  $^1\text{H}$ - $^1\text{H}$  COSY spectrum of compound **8** in  $\text{CD}_3\text{OD}$ .

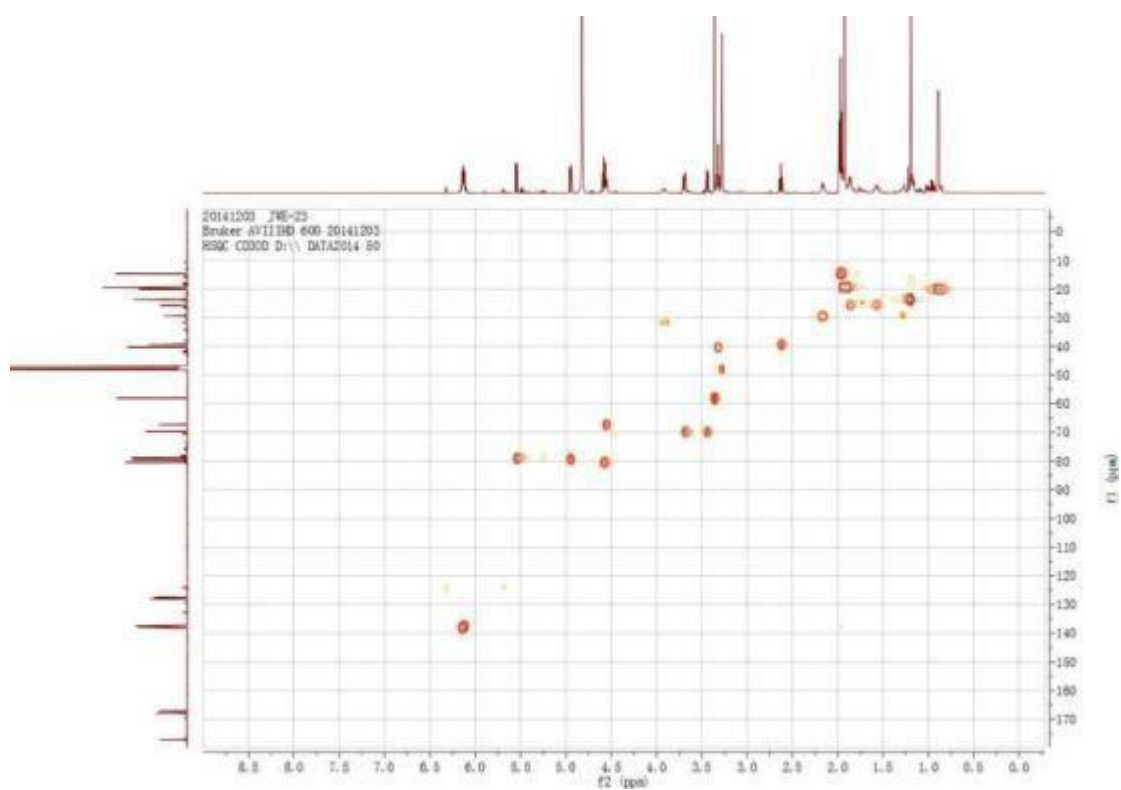

**Figure S8.4** HSQC spectrum of compound **8** in CD<sub>3</sub>OD.

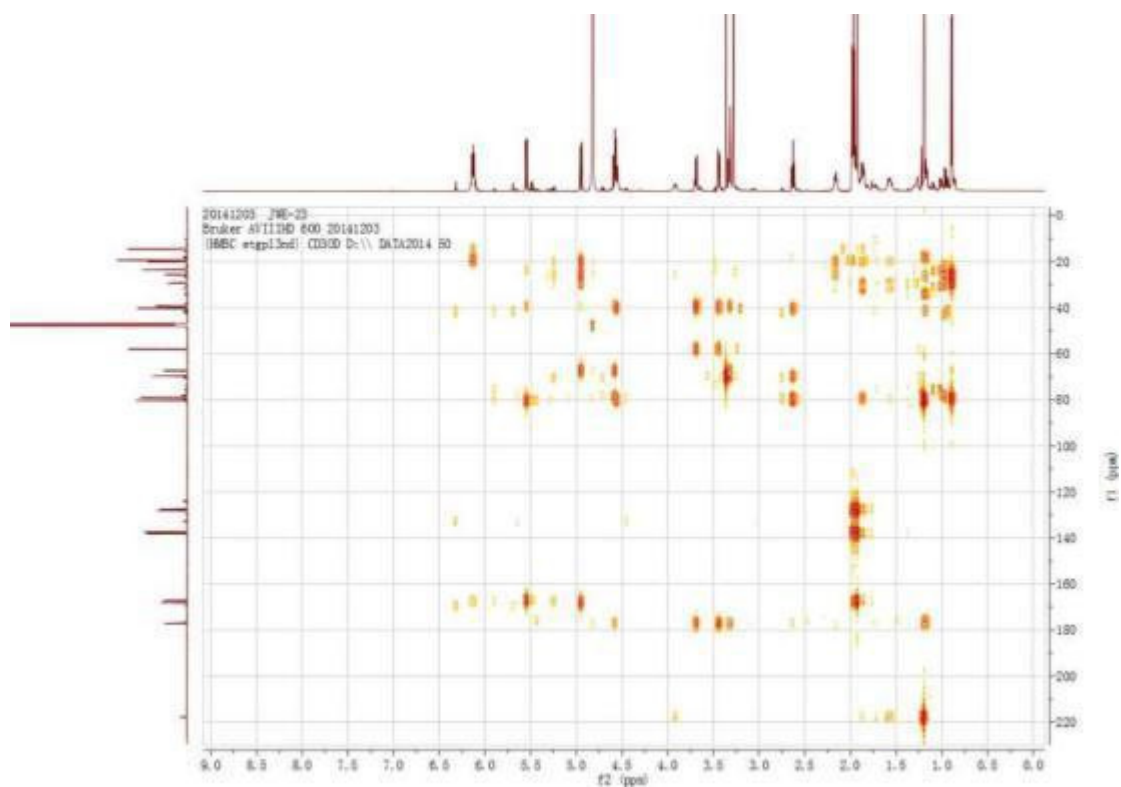

**Figure S8.5** HMBC spectrum of compound **8** in CD<sub>3</sub>OD.

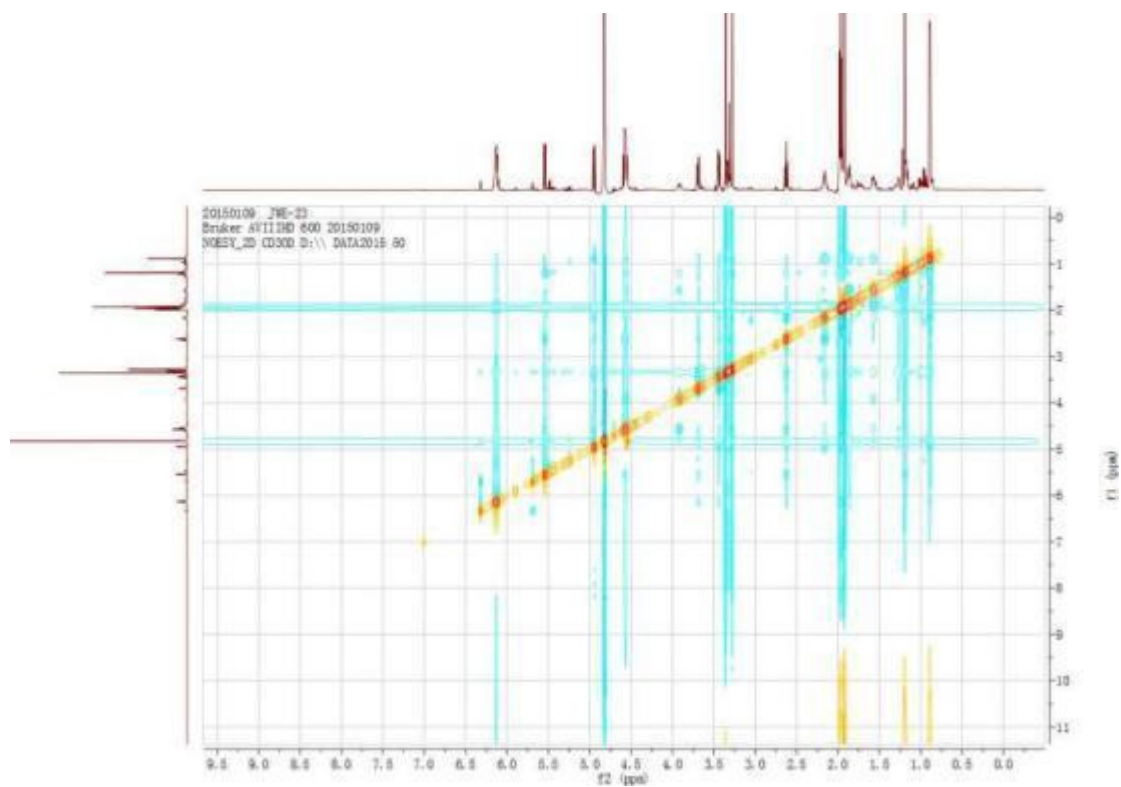

**Figure S8.6** NOESY spectrum of compound **8** in CD<sub>3</sub>OD.

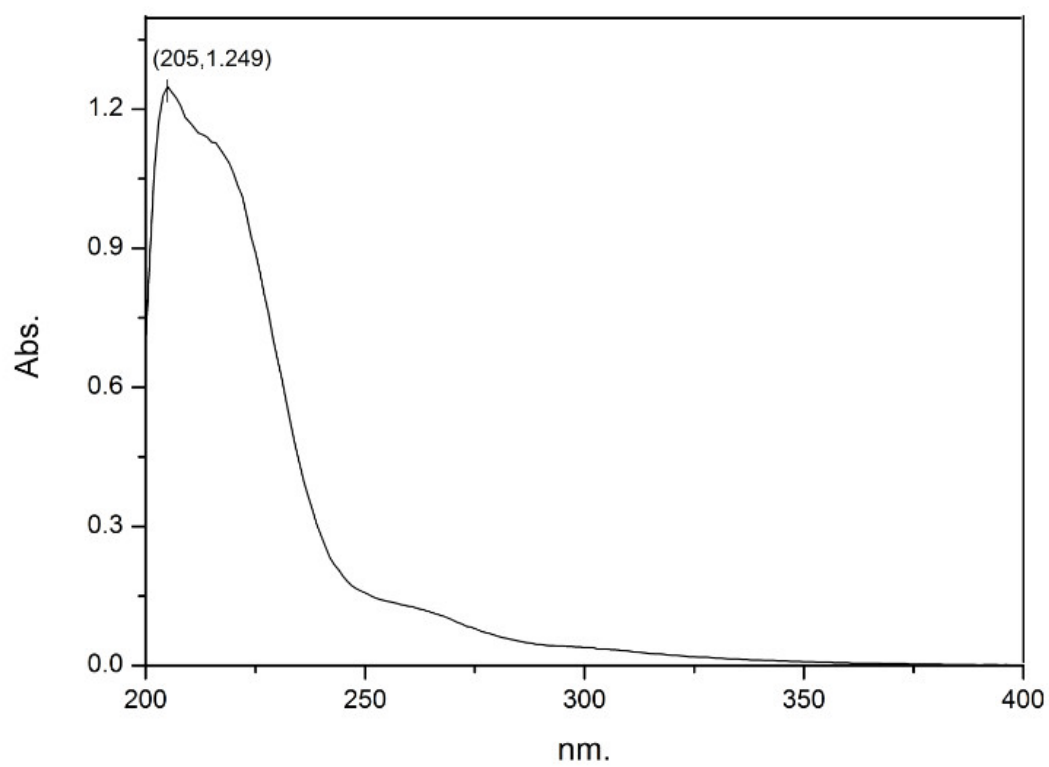

**Figure S8.7** UV spectrum of compound **8**.

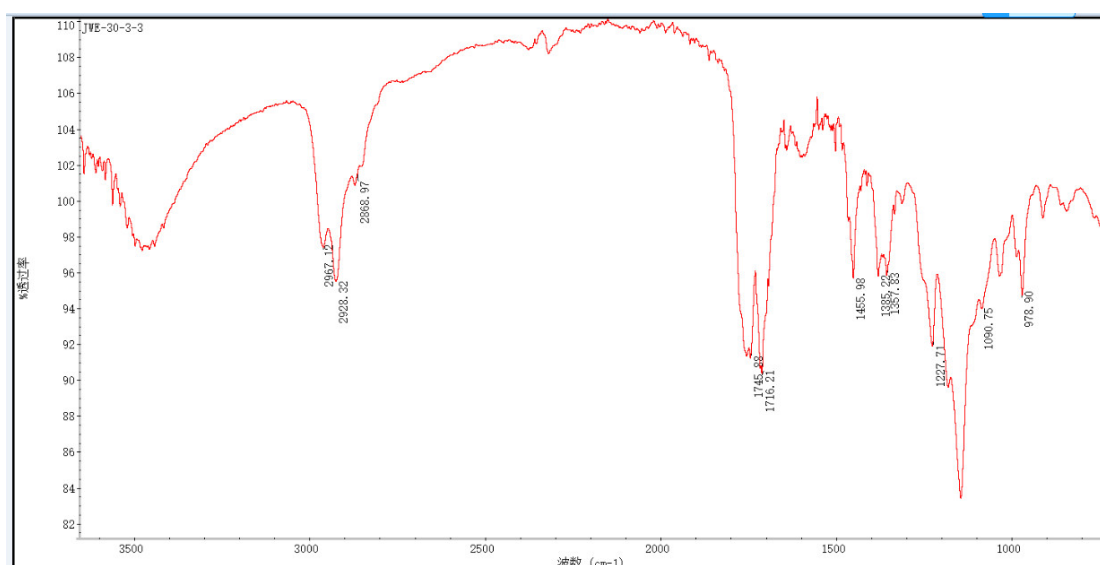

**Figure S8.8** IR spectrum of compound **8**.

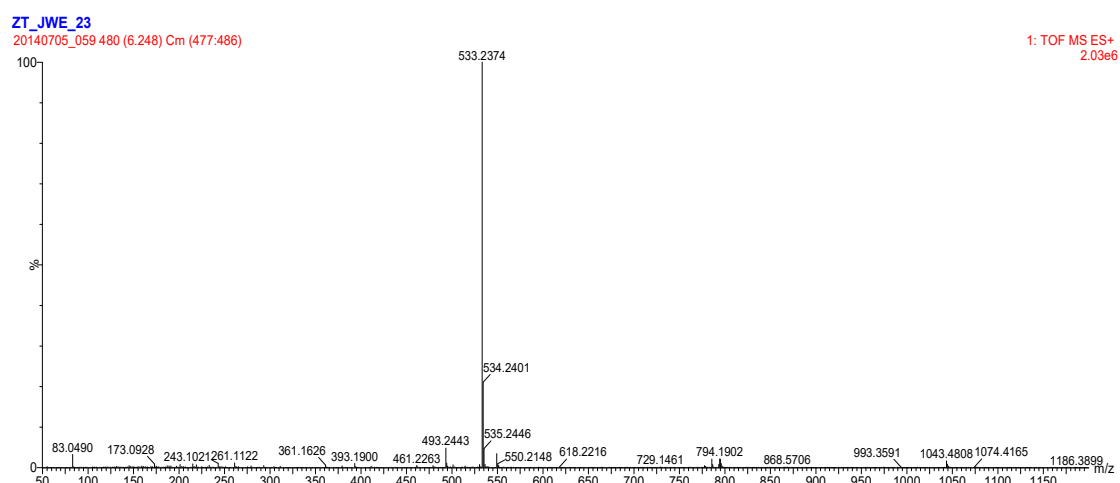

**Figure S8.9** HRESIMS spectrum of compound **8**.

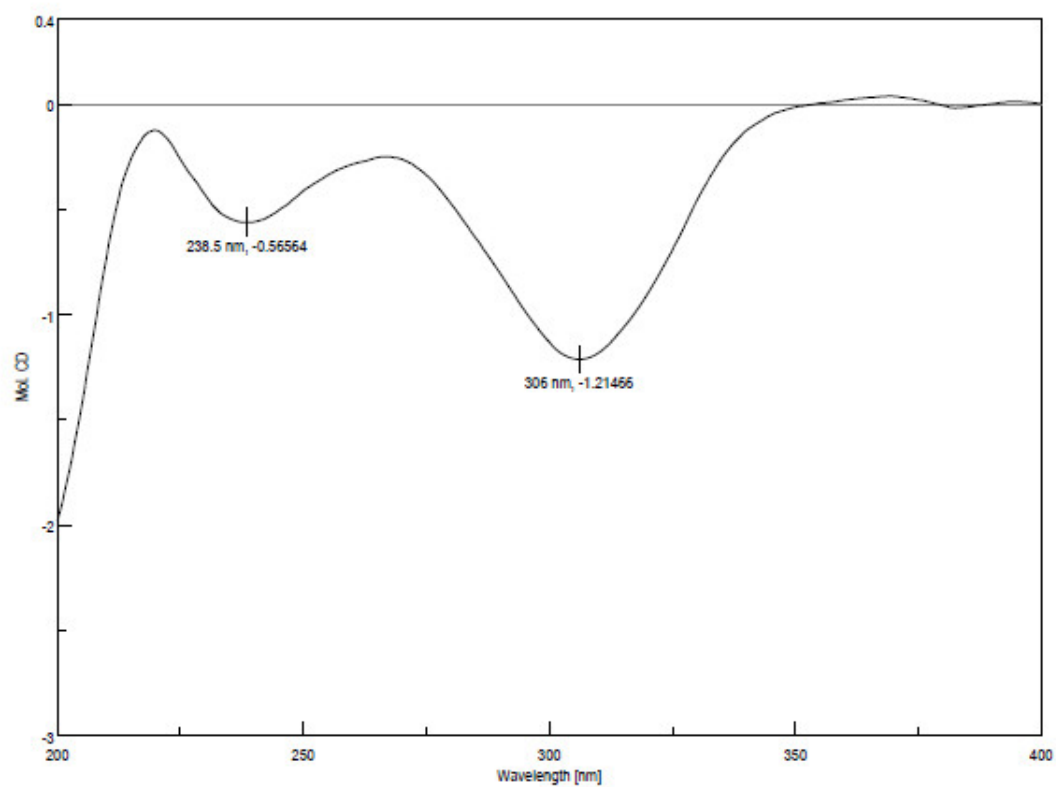

**Figure S8.10** ECD spectrum of compound **8**.
